# Supplementary material for: Mechanistic insights into rare-earth-catalysed C–H alkylation of sulfides: sulfide facilitating alkene insertion and beyond
Source: Royal Society of Chemistry journal article supplement (doi:10.1039/d2ra02180c), 2022-01-01
Supplement: d2ra02180c1.pdf [file d2ra02180c1.pdf]

*Electronic Supplementary Information*

**Mechanistic Insights into Rare-Earth-Catalysed C–H Alkylation of  
Sulfides: Sulfide Facilitating Alkene Insertion and Beyond**

Yu Zhou, Ping Wu, Fanshu Cao, Lei Shi, Ni Zhang, Zuqian Xue, and Gen Luo\*

*Institutes of Physical Science and Information Technology, Anhui University, Hefei  
230601, China.*

*E-mail:* luogen@ahu.edu.cn (G.L.)

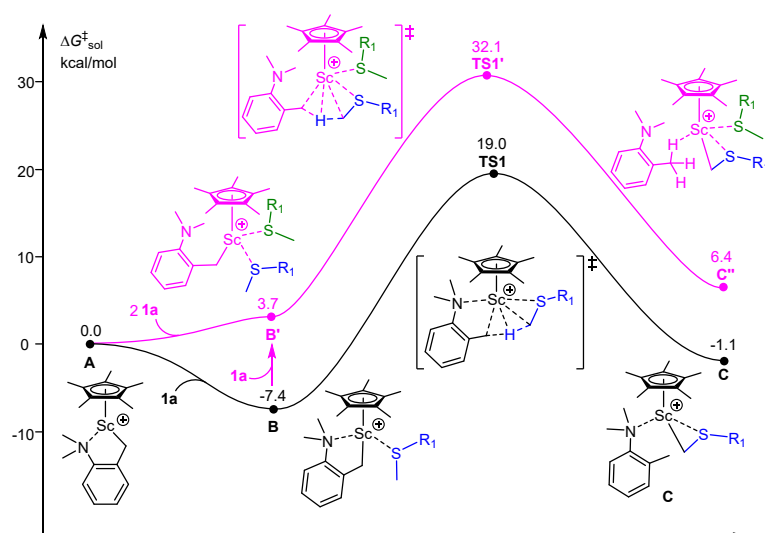

**Fig. S1** Computed C–H activation of sulfide **1a** by species **A** via *N*-ligated and *N*-dissociated pathways.

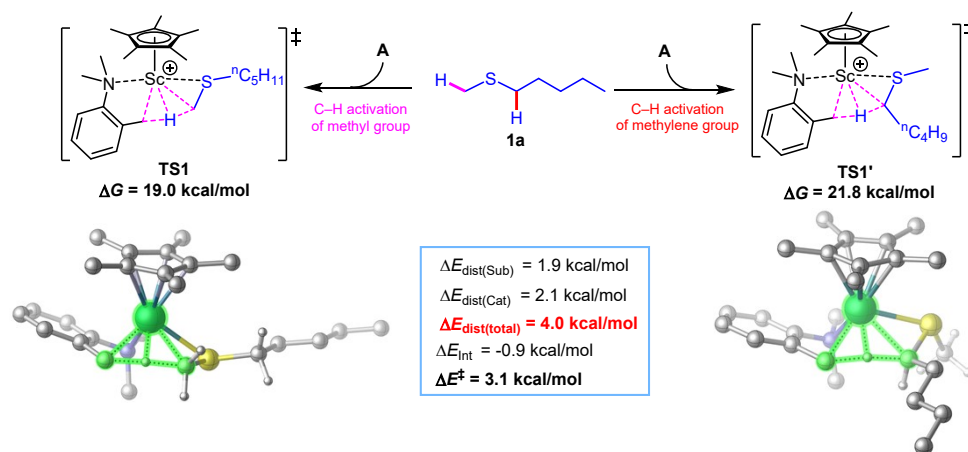

**Fig. S2** Computed C–H activation of sulfide **1a** for both  $\alpha$ -methyl and  $\alpha$ -methylene sites and distortion-interaction analysis for two transition states. All H atoms except for those involved in  $\alpha$ -methyl and  $\alpha$ -methylene are omitted for clarity.

In distortion-interaction analysis (DIA), we divided each structure of transition state into two fragments (*i.e.*, the substrate moiety as fragment Sub and the remaining part as fragment Cat). The energies of the two parts at the geometry they have in the transition states were evaluated through single-point calculations.  $\Delta E_{\text{dist(Sub)}}$  is the energy difference between fragment Sub in the two transition state geometries, whereas  $\Delta E_{\text{dist(Cat)}}$  is the energy difference of fragment Cat in the transition states.  $\Delta E_{\text{dist(total)}}$  denotes the energy sum of  $\Delta E_{\text{dist(Sub)}}$  and  $\Delta E_{\text{dist(Cat)}}$ . The single-point energies of the two fragments and the electronic energy of the corresponding transition state were used to

estimate the interaction energy between the two fragments.  $\Delta E_{\text{int}}$  is the difference in interaction energies between fragments in these transition state geometries. The difference of activation energy between the transition states ( $\Delta E^{\ddagger}$ ) is defined as  $\Delta E^{\ddagger} = \Delta E_{\text{int}} + \Delta E_{\text{dist(Sub)}} + \Delta E_{\text{dist(Cat)}}$ .

As shown in Figure S1, the computational result shows that  $\alpha$ -C(methyl)-H bond activation is more favorable than that of  $\alpha$ -C(methylene)-H bond by 2.8 kcal/mol, which is line with the experimental observation of  $\alpha$ -C(methyl)-H alkylation product. DIA results indicated that the selectivity of this reaction obviously arises from the greater distortion energy in **TS1'** than in **TS1** ( $\Delta E_{\text{dist(total)}} = 4.0$  kcal/mol). Therefore, the selectivity of C-H activation is resulted from steric factors.

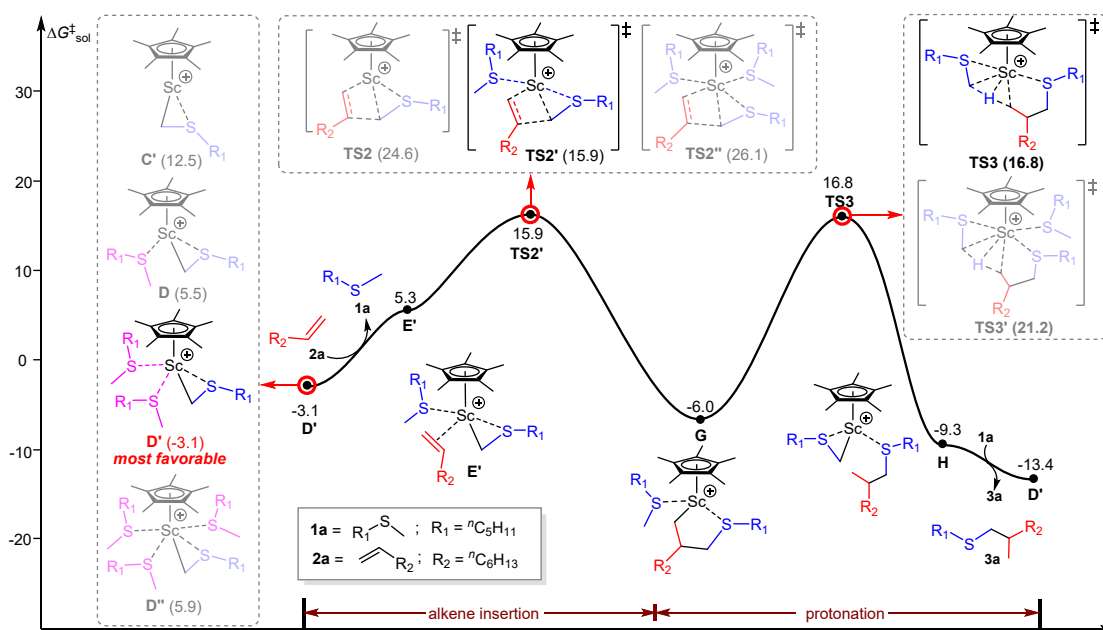

**Fig. S3** Energy profiles for the processes of substrate-assisted/free alkene insertion and protonation. Relative free energies are given in kcal/mol.

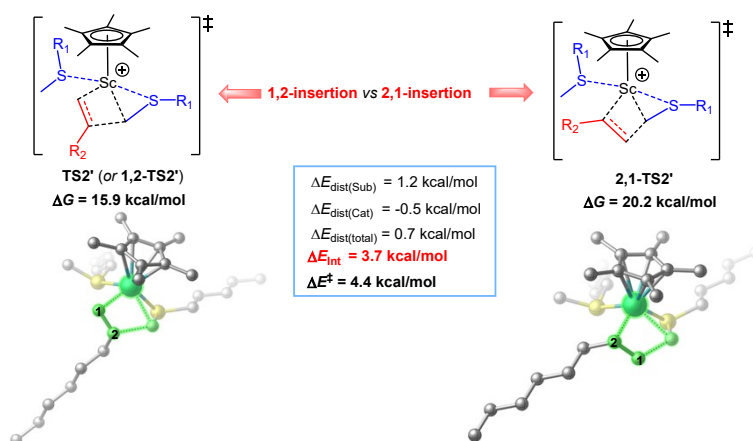

**Fig. S4** Computed alkene insertion via 1,2- and 2,1-insertion modes and distortion-interaction analysis for two transition states. All H atoms in 3D structures are omitted for clarity.

The result shows that alkene insertion through 1,2-insertion mode is more favorable than that 2,1-insertion path by 4.3 kcal/mol, which is line with the experimental observation of regioselectivity. DIA results indicated that the regioselectivity of this reaction is mainly thanks to the stronger interaction in **1,2-TS2'** than in **2,1-TS2'** ( $\Delta E_{\text{int}} = 3.7 \text{ kcal/mol}$ ). Therefore, the regioselectivity of alkene insertion is controlled by electronic factors.

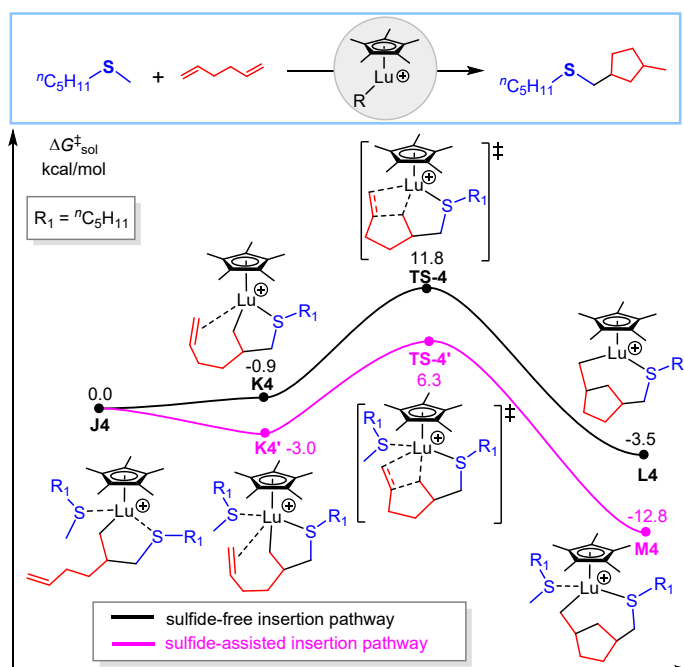

**Fig. S5** Energy profiles for cyclization processes for the case of 1,5-heptadiene catalysed by  $(\text{C}_5\text{Me}_5)\text{LuR}_2$ .

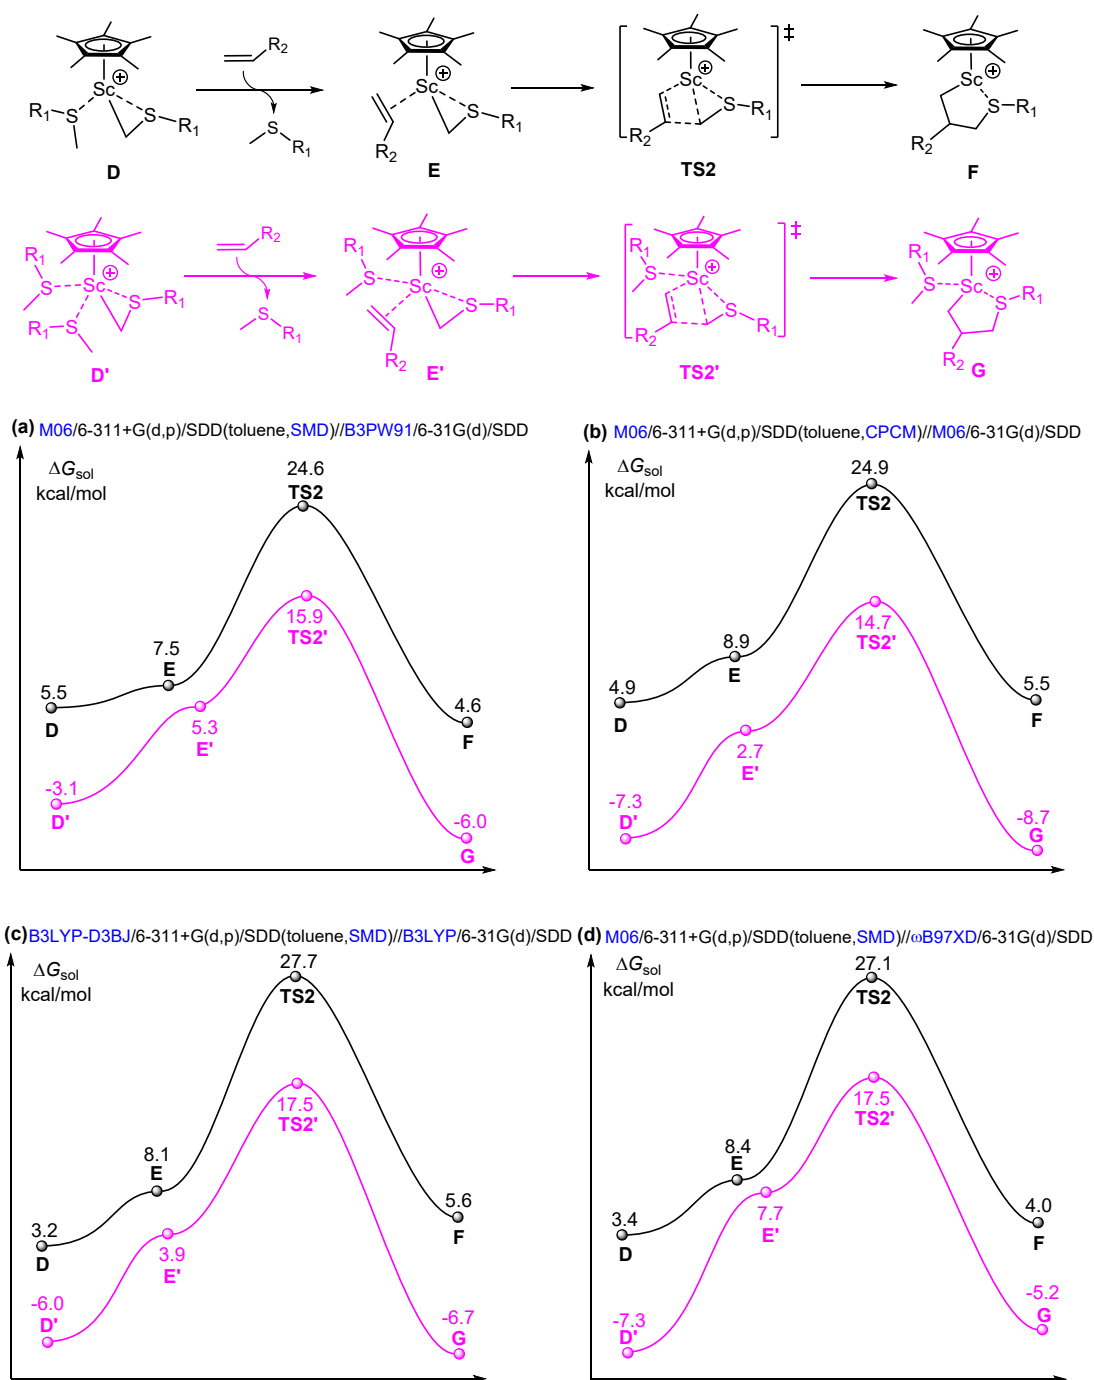

**Fig. S6** Energy profiles for alkene insertion via slide-free and sulfide-facilitated pathways calculated at different functional/basis set/solvation model combinations. The free energies (kcal mol<sup>-1</sup>) are relative to the initial species **A** calculated at their corresponding theoretical level.

## DFT Optimized Cartesian Coordinates of All Structures

Optimized Cartesian coordinates and their corresponding single-point energies ( $E_{(\text{SCRF})}$ , a.u.) calculated at the M06/6-311+G(d,p)-SDD(SMD, toluene)//B3PW91/6-31G(d)-SDD level as well as the imaginary frequency (IF,  $\text{cm}^{-1}$ ) of transition states.

48 (the number of atoms involved in the molecule)

**A,  $E_{(\text{SCF Done})} = -841.276398$  a.u.**

|   |              |              |              |
|---|--------------|--------------|--------------|
| N | -1.581041000 | 1.768803000  | -0.437999000 |
| C | -0.787415000 | -0.459681000 | -2.057581000 |
| H | -0.917450000 | 0.353459000  | -2.780578000 |
| H | -0.530953000 | -1.386508000 | -2.568482000 |
| C | -1.828829000 | -0.612571000 | -1.037101000 |
| C | -2.185870000 | 0.466750000  | -0.162678000 |
| C | -3.058960000 | 0.265464000  | 0.921195000  |
| H | -3.346704000 | 1.099039000  | 1.553575000  |
| C | -3.578025000 | -0.993097000 | 1.179600000  |
| H | -4.258788000 | -1.136245000 | 2.013087000  |
| C | -3.227118000 | -2.070520000 | 0.354950000  |
| H | -3.637253000 | -3.057533000 | 0.549447000  |
| C | -2.369697000 | -1.883058000 | -0.714557000 |
| H | -2.115544000 | -2.719818000 | -1.359508000 |
| C | -1.544561000 | 2.693895000  | 0.712157000  |
| H | -2.543787000 | 3.059853000  | 0.980015000  |
| H | -0.930991000 | 3.559359000  | 0.444934000  |
| H | -1.112565000 | 2.206443000  | 1.593949000  |
| C | -2.177737000 | 2.460942000  | -1.605199000 |
| H | -2.286219000 | 1.770461000  | -2.441026000 |
| H | -1.534890000 | 3.294084000  | -1.904397000 |
| H | -3.170138000 | 2.848686000  | -1.343564000 |
| C | 2.607367000  | 0.659239000  | 0.182313000  |
| C | 1.909101000  | 0.305461000  | 1.378060000  |
| C | 1.368022000  | -1.006788000 | 1.199261000  |
| C | 1.753442000  | -1.470110000 | -0.098058000 |
| C | 2.510945000  | -0.441376000 | -0.728453000 |
| C | 1.834105000  | 1.128746000  | 2.634088000  |
| H | 0.926595000  | 0.926023000  | 3.213151000  |
| H | 1.874654000  | 2.205238000  | 2.434637000  |
| H | 2.682602000  | 0.899982000  | 3.292123000  |
| C | 0.634776000  | -1.813531000 | 2.233964000  |
| H | 1.332091000  | -2.462342000 | 2.779838000  |
| H | -0.127239000 | -2.460929000 | 1.788506000  |
| H | 0.138897000  | -1.181402000 | 2.977321000  |
| C | 1.495989000  | -2.841639000 | -0.645906000 |
| H | 1.503642000  | -2.854645000 | -1.739507000 |

|    |             |              |              |
|----|-------------|--------------|--------------|
| H  | 0.535449000 | -3.245357000 | -0.310341000 |
| H  | 2.273568000 | -3.539149000 | -0.307746000 |
| C  | 3.161269000 | -0.525934000 | -2.079089000 |
| H  | 4.165151000 | -0.962519000 | -1.995825000 |
| H  | 3.282193000 | 0.457604000  | -2.545290000 |
| H  | 2.590881000 | -1.153814000 | -2.770172000 |
| C  | 3.381776000 | 1.927971000  | -0.048368000 |
| H  | 4.429128000 | 1.798945000  | 0.254401000  |
| H  | 3.396020000 | 2.224264000  | -1.103149000 |
| H  | 2.989187000 | 2.769965000  | 0.532289000  |
| Sc | 0.288965000 | 0.455441000  | -0.375395000 |

21

**1a,  $E_{(\text{SCF Done})} = -635.125258$  a.u.**

|   |              |              |              |
|---|--------------|--------------|--------------|
| C | -4.215698000 | 0.346928000  | -0.000149000 |
| H | -5.103907000 | -0.295093000 | 0.000077000  |
| H | -4.272428000 | 0.993395000  | 0.884342000  |
| H | -4.272392000 | 0.992726000  | -0.885130000 |
| C | -2.930790000 | -0.478509000 | 0.000184000  |
| H | -2.918738000 | -1.139421000 | 0.878430000  |
| H | -2.918653000 | -1.139998000 | -0.877628000 |
| C | -1.665358000 | 0.381016000  | -0.000040000 |
| H | -1.676340000 | 1.042623000  | 0.878939000  |
| H | -1.676333000 | 1.042183000  | -0.879351000 |
| C | -0.376716000 | -0.444578000 | 0.000141000  |
| H | -0.360548000 | -1.101968000 | -0.879776000 |
| H | -0.360603000 | -1.101726000 | 0.880240000  |
| C | 0.875401000  | 0.428980000  | 0.000050000  |
| H | 0.888081000  | 1.075277000  | 0.887170000  |
| H | 0.887912000  | 1.075362000  | -0.887013000 |
| S | 2.375677000  | -0.610254000 | -0.000148000 |
| C | 3.646250000  | 0.684712000  | 0.000088000  |
| H | 3.578194000  | 1.312853000  | 0.894592000  |
| H | 4.618193000  | 0.183367000  | 0.000005000  |
| H | 3.578197000  | 1.313195000  | -0.894175000 |

69

**B,  $E_{(\text{SCF Done})} = -1476.436922$  a.u.**

|   |             |              |              |
|---|-------------|--------------|--------------|
| N | 0.663089000 | -2.073646000 | -0.295451000 |
| C | 1.911262000 | -0.082525000 | -1.979575000 |
| H | 1.283881000 | -0.613530000 | -2.707286000 |
| H | 2.519778000 | 0.661585000  | -2.495671000 |
| C | 2.713067000 | -0.961394000 | -1.105892000 |
| C | 2.114209000 | -1.912348000 | -0.226645000 |
| C | 2.894424000 | -2.674774000 | 0.657137000  |
| H | 2.427133000 | -3.415136000 | 1.298224000  |

|    |              |              |              |
|----|--------------|--------------|--------------|
| C  | 4.269310000  | -2.508019000 | 0.707568000  |
| H  | 4.863862000  | -3.112070000 | 1.386283000  |
| C  | 4.880901000  | -1.566151000 | -0.129021000 |
| H  | 5.959378000  | -1.436100000 | -0.104361000 |
| C  | 4.117129000  | -0.810234000 | -1.001542000 |
| H  | 4.600888000  | -0.098230000 | -1.664791000 |
| C  | 0.045149000  | -2.620054000 | 0.927668000  |
| H  | 0.282644000  | -3.682299000 | 1.071329000  |
| H  | -1.041741000 | -2.530853000 | 0.839857000  |
| H  | 0.381667000  | -2.065514000 | 1.808414000  |
| C  | 0.254718000  | -2.904123000 | -1.452174000 |
| H  | 0.711849000  | -2.530429000 | -2.368214000 |
| H  | -0.832041000 | -2.872797000 | -1.560973000 |
| H  | 0.577413000  | -3.941875000 | -1.296865000 |
| C  | -0.319770000 | 2.118097000  | 1.066522000  |
| C  | 0.293638000  | 1.204788000  | 1.981083000  |
| C  | 1.695031000  | 1.191872000  | 1.716944000  |
| C  | 1.945373000  | 2.089351000  | 0.630924000  |
| C  | 0.703041000  | 2.664109000  | 0.238477000  |
| C  | -0.410606000 | 0.519453000  | 3.119048000  |
| H  | 0.178633000  | -0.304058000 | 3.534195000  |
| H  | -1.391272000 | 0.119689000  | 2.833620000  |
| H  | -0.587659000 | 1.224598000  | 3.942004000  |
| C  | 2.749343000  | 0.496565000  | 2.528791000  |
| H  | 3.153590000  | 1.178829000  | 3.288527000  |
| H  | 3.588857000  | 0.159076000  | 1.914313000  |
| H  | 2.358452000  | -0.376779000 | 3.059860000  |
| C  | 3.293373000  | 2.497086000  | 0.116296000  |
| H  | 3.257916000  | 2.792278000  | -0.937168000 |
| H  | 4.029667000  | 1.694754000  | 0.215782000  |
| H  | 3.673699000  | 3.358890000  | 0.681311000  |
| C  | 0.542227000  | 3.734068000  | -0.801943000 |
| H  | 0.901548000  | 4.698961000  | -0.420864000 |
| H  | -0.504170000 | 3.877349000  | -1.087380000 |
| H  | 1.114501000  | 3.519489000  | -1.711745000 |
| C  | -1.752939000 | 2.560799000  | 1.125967000  |
| H  | -1.884171000 | 3.325687000  | 1.903287000  |
| H  | -2.086846000 | 3.008509000  | 0.185089000  |
| H  | -2.436572000 | 1.741560000  | 1.374331000  |
| Sc | 0.601974000  | 0.241130000  | -0.238292000 |
| C  | -7.106617000 | -1.282966000 | 1.436494000  |
| H  | -7.416872000 | -2.040910000 | 2.163188000  |
| H  | -7.259470000 | -0.299297000 | 1.896039000  |
| H  | -7.778849000 | -1.355482000 | 0.573574000  |



|   |              |              |              |
|---|--------------|--------------|--------------|
| C | -5.650503000 | -1.481537000 | 1.021823000  |
| H | -5.006338000 | -1.440379000 | 1.912149000  |
| H | -5.523205000 | -2.486897000 | 0.596308000  |
| C | -5.175554000 | -0.440485000 | 0.005901000  |
| H | -5.299899000 | 0.566415000  | 0.429506000  |
| H | -5.818431000 | -0.481334000 | -0.884613000 |
| C | -3.716505000 | -0.640028000 | -0.417121000 |
| H | -3.595568000 | -1.641417000 | -0.851968000 |
| H | -3.072429000 | -0.597409000 | 0.473810000  |
| C | -3.269338000 | 0.412394000  | -1.426493000 |
| H | -3.346182000 | 1.421160000  | -1.010869000 |
| H | -3.885548000 | 0.363056000  | -2.331054000 |
| S | -1.545058000 | 0.118923000  | -1.972265000 |
| C | -1.327469000 | 1.421386000  | -3.221138000 |
| H | -1.508869000 | 2.411416000  | -2.797880000 |
| H | -0.298194000 | 1.361544000  | -3.581596000 |
| H | -2.010557000 | 1.234971000  | -4.053775000 |

69

**TS1,  $E_{(\text{SCF Done})} = -1476.395118$  a.u., IF =  $i1256.314$  cm<sup>-1</sup>**

|   |              |              |              |
|---|--------------|--------------|--------------|
| N | 1.135332000  | -2.140375000 | 0.055027000  |
| C | 2.180981000  | -0.443790000 | -2.050923000 |
| H | 2.074287000  | -1.242193000 | -2.798730000 |
| H | 2.655460000  | 0.403152000  | -2.555500000 |
| C | 3.025534000  | -0.897967000 | -0.898334000 |
| C | 2.530261000  | -1.738553000 | 0.131825000  |
| C | 3.366190000  | -2.160824000 | 1.176747000  |
| H | 2.984006000  | -2.818080000 | 1.950514000  |
| C | 4.695577000  | -1.766497000 | 1.217118000  |
| H | 5.337136000  | -2.114622000 | 2.021227000  |
| C | 5.203214000  | -0.932584000 | 0.216291000  |
| H | 6.246189000  | -0.629457000 | 0.234935000  |
| C | 4.376614000  | -0.502724000 | -0.810718000 |
| H | 4.780276000  | 0.125379000  | -1.600120000 |
| C | 0.533496000  | -2.529330000 | 1.344479000  |
| H | 0.925768000  | -3.487126000 | 1.710209000  |
| H | -0.545087000 | -2.633949000 | 1.203461000  |
| H | 0.723432000  | -1.762870000 | 2.102877000  |
| C | 0.922145000  | -3.230744000 | -0.925828000 |
| H | 1.343909000  | -2.960390000 | -1.893593000 |
| H | -0.149252000 | -3.407379000 | -1.041943000 |
| H | 1.409765000  | -4.149367000 | -0.574628000 |
| C | -0.494301000 | 2.168638000  | 0.481377000  |
| C | 0.207909000  | 1.572792000  | 1.576283000  |
| C | 1.603379000  | 1.649047000  | 1.298145000  |

|    |               |               |               |
|----|---------------|---------------|---------------|
| C  | 1. 761807000  | 2. 260015000  | 0. 015102000  |
| C  | 0. 463866000  | 2. 586153000  | -0. 482449000 |
| C  | -0. 428804000 | 1. 093571000  | 2. 850795000  |
| H  | 0. 239326000  | 0. 448333000  | 3. 430044000  |
| H  | -1. 358314000 | 0. 540483000  | 2. 671994000  |
| H  | -0. 684873000 | 1. 942773000  | 3. 498335000  |
| C  | 2. 715373000  | 1. 295878000  | 2. 242588000  |
| H  | 3. 011182000  | 2. 179148000  | 2. 824443000  |
| H  | 3. 606187000  | 0. 937997000  | 1. 719414000  |
| H  | 2. 422300000  | 0. 525391000  | 2. 962630000  |
| C  | 3. 055031000  | 2. 714853000  | -0. 593771000 |
| H  | 3. 037867000  | 2. 675861000  | -1. 688247000 |
| H  | 3. 903928000  | 2. 120585000  | -0. 246371000 |
| H  | 3. 256550000  | 3. 758645000  | -0. 317552000 |
| C  | 0. 195916000  | 3. 376764000  | -1. 730176000 |
| H  | 0. 378983000  | 4. 445150000  | -1. 555015000 |
| H  | -0. 841881000 | 3. 285664000  | -2. 065914000 |
| H  | 0. 842701000  | 3. 075395000  | -2. 561572000 |
| C  | -1. 956282000 | 2. 500682000  | 0. 483583000  |
| H  | -2. 129454000 | 3. 423047000  | 1. 054534000  |
| H  | -2. 343455000 | 2. 681802000  | -0. 523646000 |
| H  | -2. 563401000 | 1. 719590000  | 0. 951791000  |
| Sc | 0. 638348000  | 0. 109429000  | -0. 317546000 |
| C  | -8. 030621000 | -0. 421788000 | 0. 800143000  |
| H  | -8. 654593000 | -0. 835591000 | 1. 599212000  |
| H  | -8. 083605000 | 0. 671294000  | 0. 869405000  |
| H  | -8. 477623000 | -0. 716599000 | -0. 156632000 |
| C  | -6. 590388000 | -0. 915943000 | 0. 914545000  |
| H  | -6. 182354000 | -0. 636896000 | 1. 896368000  |
| H  | -6. 573748000 | -2. 014094000 | 0. 876610000  |
| C  | -5. 683265000 | -0. 360407000 | -0. 185629000 |
| H  | -5. 698520000 | 0. 738533000  | -0. 150298000 |
| H  | -6. 088017000 | -0. 642477000 | -1. 167989000 |
| C  | -4. 237289000 | -0. 855218000 | -0. 071593000 |
| H  | -4. 221738000 | -1. 952533000 | -0. 114908000 |
| H  | -3. 827612000 | -0. 571323000 | 0. 907677000  |
| C  | -3. 359908000 | -0. 285662000 | -1. 181609000 |
| H  | -3. 312290000 | 0. 804432000  | -1. 138365000 |
| H  | -3. 732911000 | -0. 580130000 | -2. 168122000 |
| S  | -1. 653804000 | -0. 962138000 | -1. 070820000 |
| C  | -0. 667240000 | -0. 078126000 | -2. 298251000 |
| H  | -1. 031075000 | 0. 944236000  | -2. 433741000 |
| H  | 0. 764178000  | -0. 205167000 | -2. 173161000 |
| H  | -0. 670559000 | -0. 597236000 | -3. 261674000 |

**C,  $E_{(\text{SCF Done})} = -1476.427369$  a.u.**

|   |              |              |              |
|---|--------------|--------------|--------------|
| N | 1.430762000  | -1.877930000 | 0.024281000  |
| C | 2.904340000  | -0.512208000 | -2.184021000 |
| H | 3.061221000  | -1.273539000 | -2.960011000 |
| H | 3.355150000  | 0.413580000  | -2.551784000 |
| C | 3.537999000  | -0.929131000 | -0.878944000 |
| C | 2.861526000  | -1.600104000 | 0.161664000  |
| C | 3.564083000  | -2.000768000 | 1.304331000  |
| H | 3.060382000  | -2.529436000 | 2.105234000  |
| C | 4.924012000  | -1.737159000 | 1.436582000  |
| H | 5.447720000  | -2.060595000 | 2.331299000  |
| C | 5.601003000  | -1.066081000 | 0.422544000  |
| H | 6.661788000  | -0.852538000 | 0.513797000  |
| C | 4.905842000  | -0.671965000 | -0.715482000 |
| H | 5.433926000  | -0.154856000 | -1.513310000 |
| C | 0.765679000  | -2.258054000 | 1.290319000  |
| H | 1.102567000  | -3.236446000 | 1.656178000  |
| H | -0.311631000 | -2.324989000 | 1.110068000  |
| H | 0.959124000  | -1.509176000 | 2.064198000  |
| C | 1.199559000  | -2.968107000 | -0.961926000 |
| H | 1.626107000  | -2.706631000 | -1.929709000 |
| H | 0.125371000  | -3.127771000 | -1.082208000 |
| H | 1.669406000  | -3.894535000 | -0.607899000 |
| C | -0.731294000 | 2.207577000  | 0.521085000  |
| C | 0.007432000  | 1.610834000  | 1.590802000  |
| C | 1.394183000  | 1.701718000  | 1.273897000  |
| C | 1.508665000  | 2.324217000  | -0.008089000 |
| C | 0.194546000  | 2.649678000  | -0.466489000 |
| C | -0.585003000 | 1.119393000  | 2.881641000  |
| H | 0.093704000  | 0.452752000  | 3.423185000  |
| H | -1.530582000 | 0.586150000  | 2.731906000  |
| H | -0.799044000 | 1.962414000  | 3.552004000  |
| C | 2.538838000  | 1.356324000  | 2.182110000  |
| H | 2.821629000  | 2.232984000  | 2.780331000  |
| H | 3.429209000  | 1.039802000  | 1.631319000  |
| H | 2.287552000  | 0.560058000  | 2.890138000  |
| C | 2.789902000  | 2.744296000  | -0.670038000 |
| H | 2.692638000  | 2.798929000  | -1.759261000 |
| H | 3.619634000  | 2.070886000  | -0.433999000 |
| H | 3.082744000  | 3.746014000  | -0.327976000 |
| C | -0.124713000 | 3.456502000  | -1.690991000 |
| H | -0.011382000 | 4.529060000  | -1.484741000 |
| H | -1.153954000 | 3.303738000  | -2.029305000 |

|    |              |              |              |
|----|--------------|--------------|--------------|
| H  | 0.536045000  | 3.217735000  | -2.530576000 |
| C  | -2.202831000 | 2.496310000  | 0.548459000  |
| H  | -2.396473000 | 3.413204000  | 1.121445000  |
| H  | -2.610249000 | 2.661520000  | -0.453363000 |
| H  | -2.778177000 | 1.696334000  | 1.025300000  |
| Sc | 0.382761000  | 0.201313000  | -0.369052000 |
| C  | -8.104114000 | -0.827388000 | 0.833704000  |
| H  | -8.695283000 | -1.306492000 | 1.621194000  |
| H  | -8.202583000 | 0.257699000  | 0.957745000  |
| H  | -8.555403000 | -1.094329000 | -0.129223000 |
| C  | -6.642224000 | -1.263255000 | 0.900078000  |
| H  | -6.228624000 | -1.015377000 | 1.887978000  |
| H  | -6.579446000 | -2.356466000 | 0.807325000  |
| C  | -5.779509000 | -0.615861000 | -0.185496000 |
| H  | -5.839629000 | 0.478419000  | -0.094606000 |
| H  | -6.190816000 | -0.865400000 | -1.173902000 |
| C  | -4.312697000 | -1.054870000 | -0.121138000 |
| H  | -4.253176000 | -2.146920000 | -0.221105000 |
| H  | -3.895848000 | -0.804655000 | 0.864352000  |
| C  | -3.478958000 | -0.394369000 | -1.213611000 |
| H  | -3.468495000 | 0.693304000  | -1.110795000 |
| H  | -3.858855000 | -0.646618000 | -2.209084000 |
| S  | -1.744946000 | -1.003451000 | -1.177701000 |
| C  | -0.725033000 | 0.019247000  | -2.275608000 |
| H  | -1.261424000 | 0.933171000  | -2.549437000 |
| H  | 1.813770000  | -0.353284000 | -2.171186000 |
| H  | -0.460204000 | -0.535196000 | -3.180484000 |

23

**RH,  $E_{(\text{SCF Done})} = -405.319575$  a.u.**

|   |              |              |              |
|---|--------------|--------------|--------------|
| N | 1.575305000  | -0.058062000 | -0.178519000 |
| C | -0.057959000 | 2.325597000  | -0.374805000 |
| H | 0.205761000  | 2.841832000  | 0.558798000  |
| H | -0.772154000 | 2.967269000  | -0.901707000 |
| C | -0.647788000 | 0.962397000  | -0.131466000 |
| C | 0.165520000  | -0.192855000 | -0.057842000 |
| C | -0.443314000 | -1.447494000 | 0.089086000  |
| H | 0.173570000  | -2.339823000 | 0.141236000  |
| C | -1.827563000 | -1.572731000 | 0.180112000  |
| H | -2.272531000 | -2.558405000 | 0.293734000  |
| C | -2.630417000 | -0.437220000 | 0.133933000  |
| H | -3.711902000 | -0.520614000 | 0.203173000  |
| C | -2.032689000 | 0.811574000  | -0.024333000 |
| H | -2.658082000 | 1.700025000  | -0.092351000 |
| C | 2.296644000  | -1.207783000 | -0.686138000 |

|   |             |              |              |
|---|-------------|--------------|--------------|
| H | 2.404858000 | -2.029953000 | 0.046078000  |
| H | 3.306340000 | -0.890933000 | -0.973080000 |
| H | 1.794788000 | -1.599348000 | -1.575732000 |
| C | 2.240106000 | 0.518177000  | 0.981442000  |
| H | 1.709739000 | 1.407608000  | 1.327275000  |
| H | 3.260184000 | 0.814359000  | 0.708925000  |
| H | 2.301564000 | -0.191275000 | 1.826923000  |
| H | 0.855488000 | 2.247717000  | -0.973569000 |

46

**$C', E_{(\text{SCF Done})} = -1071.058180 \text{ a.u.}$**

|    |              |              |              |
|----|--------------|--------------|--------------|
| C  | -2.036743000 | 1.725832000  | 0.056366000  |
| C  | -2.764688000 | 1.008969000  | -0.939381000 |
| C  | -3.212894000 | -0.220713000 | -0.356692000 |
| C  | -2.776483000 | -0.259424000 | 1.003793000  |
| C  | -2.033918000 | 0.937204000  | 1.251958000  |
| C  | -3.062678000 | 1.485338000  | -2.333889000 |
| H  | -3.170565000 | 0.659570000  | -3.045380000 |
| H  | -2.293014000 | 2.162651000  | -2.719086000 |
| H  | -4.009412000 | 2.040636000  | -2.352299000 |
| C  | -4.063303000 | -1.258058000 | -1.032941000 |
| H  | -5.127323000 | -1.046477000 | -0.864664000 |
| H  | -3.873220000 | -2.264020000 | -0.645511000 |
| H  | -3.914934000 | -1.280078000 | -2.117754000 |
| C  | -3.147894000 | -1.295450000 | 2.021727000  |
| H  | -2.390296000 | -1.393489000 | 2.804520000  |
| H  | -3.289782000 | -2.282007000 | 1.571537000  |
| H  | -4.090861000 | -1.022980000 | 2.513760000  |
| C  | -1.433311000 | 1.334651000  | 2.570781000  |
| H  | -2.180848000 | 1.846121000  | 3.191094000  |
| H  | -0.592902000 | 2.027608000  | 2.457098000  |
| H  | -1.084404000 | 0.469415000  | 3.144040000  |
| C  | -1.431744000 | 3.092906000  | -0.103129000 |
| H  | -2.163089000 | 3.866678000  | 0.164139000  |
| H  | -0.563395000 | 3.245892000  | 0.546740000  |
| H  | -1.121375000 | 3.296832000  | -1.133604000 |
| Sc | -0.830275000 | -0.290237000 | -0.399537000 |
| C  | 6.976336000  | 1.223918000  | 0.357568000  |
| H  | 7.767626000  | 1.661657000  | -0.259596000 |
| H  | 6.617966000  | 2.003585000  | 1.040379000  |
| H  | 7.429282000  | 0.431408000  | 0.964758000  |
| C  | 5.843188000  | 0.679400000  | -0.508868000 |
| H  | 5.434457000  | 1.487304000  | -1.132126000 |
| H  | 6.239793000  | -0.073237000 | -1.203962000 |
| C  | 4.714188000  | 0.056207000  | 0.315511000  |

|   |              |              |              |
|---|--------------|--------------|--------------|
| H | 4.314855000  | 0.807584000  | 1.013021000  |
| H | 5.121610000  | -0.754434000 | 0.935936000  |
| C | 3.578202000  | -0.492832000 | -0.554030000 |
| H | 3.974601000  | -1.248773000 | -1.243981000 |
| H | 3.166356000  | 0.314118000  | -1.176772000 |
| C | 2.471566000  | -1.112359000 | 0.292667000  |
| H | 2.030832000  | -0.372153000 | 0.974982000  |
| H | 2.852970000  | -1.936630000 | 0.904775000  |
| S | 1.150445000  | -1.842600000 | -0.767896000 |
| C | -0.210684000 | -2.181920000 | 0.421383000  |
| H | 0.183893000  | -2.291633000 | 1.437371000  |
| H | -0.694986000 | -3.120590000 | 0.130255000  |

67

**D,  $E_{(\text{SCF Done})} = -1706.215742$  a.u.**

|    |              |              |              |
|----|--------------|--------------|--------------|
| C  | -1.011933000 | 2.406737000  | 0.020115000  |
| C  | -0.634748000 | 2.021762000  | 1.342418000  |
| C  | 0.791985000  | 1.981297000  | 1.399344000  |
| C  | 1.291664000  | 2.321139000  | 0.105172000  |
| C  | 0.176795000  | 2.587012000  | -0.748811000 |
| C  | -1.566943000 | 1.805542000  | 2.501437000  |
| H  | -1.168706000 | 1.090119000  | 3.229386000  |
| H  | -2.548797000 | 1.442188000  | 2.181575000  |
| H  | -1.735189000 | 2.745866000  | 3.042847000  |
| C  | 1.611354000  | 1.743895000  | 2.635854000  |
| H  | 1.741309000  | 2.679578000  | 3.195590000  |
| H  | 2.615644000  | 1.374505000  | 2.405127000  |
| H  | 1.138434000  | 1.032792000  | 3.322304000  |
| C  | 2.735318000  | 2.483961000  | -0.278733000 |
| H  | 2.926848000  | 2.183541000  | -1.314913000 |
| H  | 3.405959000  | 1.910069000  | 0.368647000  |
| H  | 3.037892000  | 3.536185000  | -0.195312000 |
| C  | 0.254798000  | 3.109843000  | -2.153473000 |
| H  | 0.350562000  | 4.203811000  | -2.151373000 |
| H  | -0.639831000 | 2.865553000  | -2.733565000 |
| H  | 1.117387000  | 2.711018000  | -2.696448000 |
| C  | -2.406631000 | 2.708412000  | -0.443456000 |
| H  | -2.637082000 | 3.770458000  | -0.285928000 |
| H  | -2.540332000 | 2.513079000  | -1.512416000 |
| H  | -3.161045000 | 2.136489000  | 0.105996000  |
| Sc | 0.089601000  | 0.238770000  | -0.143193000 |
| C  | -8.204971000 | -1.130377000 | 0.118315000  |
| H  | -8.885808000 | -1.514996000 | 0.884887000  |
| H  | -8.328862000 | -0.041458000 | 0.079837000  |
| H  | -8.528926000 | -1.536288000 | -0.847272000 |

|   |              |              |              |
|---|--------------|--------------|--------------|
| C | -6.758980000 | -1.514417000 | 0.423457000  |
| H | -6.475379000 | -1.125584000 | 1.411857000  |
| H | -6.674467000 | -2.608046000 | 0.488918000  |
| C | -5.772693000 | -0.995743000 | -0.625424000 |
| H | -5.854913000 | 0.098991000  | -0.692862000 |
| H | -6.053912000 | -1.386397000 | -1.613627000 |
| C | -4.321609000 | -1.383268000 | -0.321177000 |
| H | -4.238467000 | -2.476839000 | -0.267848000 |
| H | -4.035645000 | -0.996145000 | 0.666815000  |
| C | -3.362961000 | -0.848015000 | -1.379237000 |
| H | -3.376276000 | 0.244570000  | -1.417857000 |
| H | -3.615713000 | -1.233459000 | -2.372525000 |
| S | -1.641702000 | -1.408510000 | -1.051616000 |
| C | -0.539521000 | -0.417439000 | -2.126408000 |
| H | -1.131773000 | 0.280282000  | -2.727138000 |
| H | 0.020701000  | -1.084606000 | -2.788807000 |
| C | 7.844645000  | -0.946370000 | -1.030479000 |
| H | 8.391285000  | -0.777063000 | -1.963886000 |
| H | 8.058841000  | -0.103779000 | -0.362224000 |
| H | 8.252948000  | -1.851818000 | -0.566415000 |
| C | 6.346107000  | -1.083902000 | -1.289086000 |
| H | 5.973753000  | -0.177650000 | -1.787685000 |
| H | 6.167297000  | -1.913370000 | -1.987091000 |
| C | 5.543253000  | -1.322401000 | -0.008235000 |
| H | 5.719502000  | -0.493705000 | 0.692948000  |
| H | 5.913208000  | -2.230242000 | 0.488982000  |
| C | 4.039727000  | -1.465909000 | -0.267067000 |
| H | 3.862576000  | -2.296474000 | -0.962341000 |
| H | 3.667828000  | -0.555749000 | -0.759314000 |
| C | 3.268223000  | -1.713224000 | 1.025936000  |
| H | 3.388562000  | -0.890101000 | 1.737451000  |
| H | 3.607163000  | -2.637319000 | 1.507030000  |
| S | 1.481848000  | -1.955483000 | 0.679849000  |
| C | 0.826386000  | -2.426740000 | 2.311399000  |
| H | 1.026051000  | -1.660264000 | 3.063940000  |
| H | -0.251447000 | -2.574240000 | 2.203586000  |
| H | 1.279273000  | -3.374537000 | 2.613272000  |

24

**2a,  $E_{(\text{SCF Done})} = -314.295740$  a.u.**

|   |             |              |              |
|---|-------------|--------------|--------------|
| C | 4.295209000 | -0.408040000 | 0.123182000  |
| H | 4.278626000 | -1.094572000 | 0.978716000  |
| H | 5.203696000 | 0.200045000  | 0.202590000  |
| H | 4.380583000 | -1.016442000 | -0.785730000 |
| C | 3.040494000 | 0.462144000  | 0.089259000  |

|   |              |              |              |
|---|--------------|--------------|--------------|
| H | 3.001004000  | 1.084396000  | 0.994843000  |
| H | 3.102212000  | 1.162134000  | -0.756366000 |
| C | 1.747941000  | -0.348244000 | -0.021291000 |
| H | 1.686143000  | -1.049143000 | 0.824711000  |
| H | 1.787373000  | -0.971419000 | -0.927437000 |
| C | 0.486506000  | 0.515635000  | -0.055668000 |
| H | 0.548131000  | 1.216282000  | -0.902040000 |
| H | 0.448016000  | 1.138634000  | 0.850495000  |
| C | -0.804451000 | -0.296625000 | -0.165418000 |
| H | -0.875033000 | -0.996543000 | 0.678808000  |
| H | -0.769169000 | -0.916969000 | -1.073222000 |
| C | -2.067160000 | 0.576852000  | -0.197063000 |
| H | -1.981643000 | 1.285794000  | -1.035700000 |
| H | -2.122235000 | 1.182022000  | 0.717889000  |
| C | -3.327254000 | -0.222947000 | -0.350566000 |
| C | -4.332065000 | -0.255605000 | 0.525276000  |
| H | -3.397157000 | -0.829159000 | -1.256478000 |
| H | -5.218173000 | -0.863256000 | 0.359167000  |
| H | -4.307687000 | 0.329175000  | 1.443489000  |

70

**E,  $E_{(\text{SCF Done})} = -1385.382381$  a.u.**

|   |              |              |              |
|---|--------------|--------------|--------------|
| C | -2.781790000 | -1.508321000 | 0.985655000  |
| C | -1.794435000 | -0.775752000 | 1.716928000  |
| C | -2.212279000 | 0.589844000  | 1.775043000  |
| C | -3.443814000 | 0.704371000  | 1.064281000  |
| C | -3.789872000 | -0.592418000 | 0.567153000  |
| C | -0.611668000 | -1.357572000 | 2.439431000  |
| H | 0.234891000  | -0.663953000 | 2.482175000  |
| H | -0.260101000 | -2.285823000 | 1.978822000  |
| H | -0.877469000 | -1.599761000 | 3.476940000  |
| C | -1.528335000 | 1.679003000  | 2.551642000  |
| H | -1.844387000 | 1.654201000  | 3.602970000  |
| H | -1.772391000 | 2.677064000  | 2.173793000  |
| H | -0.437980000 | 1.575332000  | 2.548064000  |
| C | -4.300677000 | 1.935281000  | 0.968065000  |
| H | -4.909627000 | 1.951571000  | 0.057892000  |
| H | -3.715124000 | 2.860148000  | 0.999074000  |
| H | -5.000709000 | 1.978480000  | 1.812715000  |
| C | -5.045051000 | -0.944018000 | -0.178486000 |
| H | -5.846106000 | -1.216935000 | 0.521092000  |
| H | -4.897876000 | -1.794115000 | -0.851346000 |
| H | -5.420386000 | -0.108473000 | -0.778727000 |
| C | -2.821629000 | -2.996639000 | 0.806292000  |
| H | -3.323168000 | -3.467452000 | 1.662135000  |



|    |              |              |              |
|----|--------------|--------------|--------------|
| H  | -3.374238000 | -3.288700000 | -0.091352000 |
| H  | -1.822131000 | -3.439242000 | 0.744277000  |
| Sc | -1.735884000 | 0.061867000  | -0.546348000 |
| C  | 5.164120000  | -4.550365000 | 0.713556000  |
| H  | 6.196792000  | -4.345275000 | 1.014475000  |
| H  | 4.637245000  | -4.953103000 | 1.586902000  |
| H  | 5.190929000  | -5.336189000 | -0.050509000 |
| C  | 4.483443000  | -3.288955000 | 0.187249000  |
| H  | 4.504051000  | -2.508839000 | 0.961466000  |
| H  | 5.052872000  | -2.891125000 | -0.664152000 |
| C  | 3.035942000  | -3.532364000 | -0.245747000 |
| H  | 2.463990000  | -3.931188000 | 0.604910000  |
| H  | 3.014716000  | -4.309875000 | -1.022489000 |
| C  | 2.352251000  | -2.267034000 | -0.775020000 |
| H  | 2.918177000  | -1.874392000 | -1.629926000 |
| H  | 2.366923000  | -1.488369000 | -0.000214000 |
| C  | 0.914408000  | -2.543549000 | -1.199237000 |
| H  | 0.308418000  | -2.891897000 | -0.357648000 |
| H  | 0.873129000  | -3.298787000 | -1.991065000 |
| S  | 0.133181000  | -1.035011000 | -1.909340000 |
| C  | -1.641454000 | -1.430074000 | -2.131582000 |
| C  | 5.889211000  | 2.973545000  | 1.468648000  |
| H  | 5.581254000  | 3.544897000  | 2.352583000  |
| H  | 6.929198000  | 3.237487000  | 1.249682000  |
| H  | 5.866210000  | 1.909877000  | 1.735850000  |
| C  | 4.982124000  | 3.266128000  | 0.275758000  |
| H  | 5.054966000  | 4.330131000  | 0.011195000  |
| H  | 5.337227000  | 2.709089000  | -0.602700000 |
| C  | 3.516548000  | 2.913236000  | 0.537787000  |
| H  | 3.160163000  | 3.473601000  | 1.414871000  |
| H  | 3.443504000  | 1.847701000  | 0.805008000  |
| C  | 2.603550000  | 3.201581000  | -0.654537000 |
| H  | 2.955113000  | 2.638685000  | -1.530992000 |
| H  | 2.677059000  | 4.265074000  | -0.923300000 |
| C  | 1.137085000  | 2.857896000  | -0.386606000 |
| H  | 0.778990000  | 3.427306000  | 0.482624000  |
| H  | 1.062757000  | 1.791766000  | -0.116113000 |
| C  | 0.230201000  | 3.142436000  | -1.595203000 |
| H  | 0.558571000  | 2.567960000  | -2.469959000 |
| H  | 0.327282000  | 4.206680000  | -1.860771000 |
| C  | -1.216346000 | 2.892486000  | -1.321948000 |
| C  | -2.036393000 | 2.116655000  | -2.063123000 |
| H  | -1.826414000 | -2.476712000 | -1.871887000 |
| H  | -1.920362000 | -1.264297000 | -3.177422000 |

|   |              |             |              |
|---|--------------|-------------|--------------|
| H | -1.636013000 | 3.410343000 | -0.456072000 |
| H | -3.109648000 | 2.081642000 | -1.863090000 |
| H | -1.688459000 | 1.644025000 | -2.983018000 |

70

**TS2,  $E_{(\text{SCF Done})} = -1385.358046$  a.u., IF =  $i287.2534$  cm<sup>-1</sup>**

|    |              |              |              |
|----|--------------|--------------|--------------|
| C  | -2.423058000 | -1.819188000 | 0.941029000  |
| C  | -2.515456000 | -2.408647000 | -0.354674000 |
| C  | -1.446461000 | -3.353156000 | -0.492094000 |
| C  | -0.688817000 | -3.334510000 | 0.713705000  |
| C  | -1.278716000 | -2.373918000 | 1.595164000  |
| C  | -3.604865000 | -2.168637000 | -1.361532000 |
| H  | -3.245940000 | -2.254608000 | -2.392855000 |
| H  | -4.060268000 | -1.179963000 | -1.248921000 |
| H  | -4.407518000 | -2.908383000 | -1.243192000 |
| C  | -1.242724000 | -4.278396000 | -1.656134000 |
| H  | -1.818816000 | -5.202542000 | -1.516874000 |
| H  | -0.194426000 | -4.567649000 | -1.776786000 |
| H  | -1.576237000 | -3.835658000 | -2.600356000 |
| C  | 0.468213000  | -4.229671000 | 1.050461000  |
| H  | 1.230753000  | -3.724711000 | 1.654245000  |
| H  | 0.956909000  | -4.624892000 | 0.155247000  |
| H  | 0.124260000  | -5.092963000 | 1.635139000  |
| C  | -0.853044000 | -2.109312000 | 3.013880000  |
| H  | -1.353755000 | -2.803895000 | 3.701067000  |
| H  | -1.108491000 | -1.097437000 | 3.346718000  |
| H  | 0.224082000  | -2.246824000 | 3.157614000  |
| C  | -3.416220000 | -0.875441000 | 1.555241000  |
| H  | -4.224022000 | -1.437149000 | 2.042718000  |
| H  | -2.966339000 | -0.241961000 | 2.327156000  |
| H  | -3.886532000 | -0.223861000 | 0.811902000  |
| Sc | -0.457670000 | -1.135470000 | -0.287832000 |
| C  | -5.991298000 | 5.277553000  | 0.541702000  |
| H  | -6.874584000 | 5.650473000  | 0.012989000  |
| H  | -6.338521000 | 4.754053000  | 1.440508000  |
| H  | -5.407549000 | 6.146805000  | 0.866864000  |
| C  | -5.164208000 | 4.357257000  | -0.352920000 |
| H  | -5.785715000 | 3.516563000  | -0.691925000 |
| H  | -4.861004000 | 4.899250000  | -1.259249000 |
| C  | -3.917520000 | 3.813106000  | 0.348716000  |
| H  | -4.217884000 | 3.268754000  | 1.255796000  |
| H  | -3.293363000 | 4.653156000  | 0.685130000  |
| C  | -3.086273000 | 2.891758000  | -0.551094000 |
| H  | -2.780139000 | 3.436522000  | -1.453537000 |
| H  | -3.704728000 | 2.047795000  | -0.885935000 |

|   |              |              |              |
|---|--------------|--------------|--------------|
| C | -1.849012000 | 2.370840000  | 0.174464000  |
| H | -2.117391000 | 1.787018000  | 1.060326000  |
| H | -1.193645000 | 3.193697000  | 0.478479000  |
| S | -0.850434000 | 1.312757000  | -0.962595000 |
| C | 0.644073000  | 0.807019000  | -0.078356000 |
| C | 8.549678000  | 2.876766000  | 0.429122000  |
| H | 8.887592000  | 2.816239000  | -0.612403000 |
| H | 9.437539000  | 2.832415000  | 1.068889000  |
| H | 8.086935000  | 3.860985000  | 0.570927000  |
| C | 7.571903000  | 1.751537000  | 0.760078000  |
| H | 8.075033000  | 0.781371000  | 0.642885000  |
| H | 7.280094000  | 1.817208000  | 1.817962000  |
| C | 6.315477000  | 1.775213000  | -0.112237000 |
| H | 6.607232000  | 1.709364000  | -1.170683000 |
| H | 5.810804000  | 2.746011000  | 0.004412000  |
| C | 5.332426000  | 0.649188000  | 0.212070000  |
| H | 5.039431000  | 0.713807000  | 1.270796000  |
| H | 5.837784000  | -0.320357000 | 0.093950000  |
| C | 4.078878000  | 0.673066000  | -0.663832000 |
| H | 4.370241000  | 0.610796000  | -1.721734000 |
| H | 3.572535000  | 1.642652000  | -0.544120000 |
| C | 3.111470000  | -0.472100000 | -0.348833000 |
| H | 2.834791000  | -0.438995000 | 0.714428000  |
| H | 3.633020000  | -1.428250000 | -0.486760000 |
| C | 1.877577000  | -0.493670000 | -1.246458000 |
| C | 1.260564000  | -1.724872000 | -1.593614000 |
| H | 0.429338000  | 0.574265000  | 0.992830000  |
| H | 1.420763000  | 1.568423000  | -0.089888000 |
| H | 1.852189000  | 0.288620000  | -2.005803000 |
| H | 0.822827000  | -1.812021000 | -2.591788000 |
| H | 1.705187000  | -2.644078000 | -1.213310000 |

70

**F,  $E_{(\text{SCF Done})} = -1385.390534$  a.u.**

|   |              |              |              |
|---|--------------|--------------|--------------|
| C | -3.418986000 | -1.787714000 | 0.077514000  |
| C | -2.883520000 | -2.388257000 | -1.100801000 |
| C | -1.822237000 | -3.265410000 | -0.706376000 |
| C | -1.700852000 | -3.209148000 | 0.712059000  |
| C | -2.673106000 | -2.276794000 | 1.195668000  |
| C | -3.393244000 | -2.193566000 | -2.501921000 |
| H | -2.608577000 | -2.326544000 | -3.254410000 |
| H | -3.837648000 | -1.203679000 | -2.652452000 |
| H | -4.175583000 | -2.929060000 | -2.730460000 |
| C | -1.024150000 | -4.146271000 | -1.623610000 |
| H | -1.510427000 | -5.124264000 | -1.734537000 |

|    |              |              |              |
|----|--------------|--------------|--------------|
| H  | -0.015103000 | -4.329640000 | -1.242092000 |
| H  | -0.930348000 | -3.724838000 | -2.630125000 |
| C  | -0.809141000 | -4.063936000 | 1.560335000  |
| H  | -0.493109000 | -3.554075000 | 2.475597000  |
| H  | 0.092970000  | -4.374394000 | 1.026042000  |
| H  | -1.337124000 | -4.977297000 | 1.864266000  |
| C  | -2.928526000 | -1.952734000 | 2.641268000  |
| H  | -3.619250000 | -2.683360000 | 3.082074000  |
| H  | -3.386485000 | -0.966677000 | 2.774742000  |
| H  | -2.012133000 | -1.982909000 | 3.240341000  |
| C  | -4.596166000 | -0.855168000 | 0.136817000  |
| H  | -5.529554000 | -1.425414000 | 0.232212000  |
| H  | -4.552835000 | -0.180161000 | 0.998288000  |
| H  | -4.693054000 | -0.243984000 | -0.767092000 |
| Sc | -1.160610000 | -1.005566000 | -0.152360000 |
| C  | -4.936888000 | 6.001348000  | 0.418838000  |
| H  | -5.919057000 | 6.239909000  | -0.002004000 |
| H  | -5.067007000 | 5.838136000  | 1.495267000  |
| H  | -4.297814000 | 6.882712000  | 0.290217000  |
| C  | -4.332044000 | 4.774787000  | -0.260248000 |
| H  | -5.011973000 | 3.918343000  | -0.146258000 |
| H  | -4.245622000 | 4.956848000  | -1.340390000 |
| C  | -2.956315000 | 4.406296000  | 0.299927000  |
| H  | -3.039532000 | 4.221372000  | 1.380730000  |
| H  | -2.275675000 | 5.261454000  | 0.184693000  |
| C  | -2.344180000 | 3.179342000  | -0.384640000 |
| H  | -2.247688000 | 3.368504000  | -1.461649000 |
| H  | -3.025864000 | 2.323121000  | -0.272142000 |
| C  | -0.977070000 | 2.836485000  | 0.198996000  |
| H  | -1.041159000 | 2.592605000  | 1.264965000  |
| H  | -0.282369000 | 3.674319000  | 0.080046000  |
| S  | -0.213324000 | 1.417877000  | -0.688827000 |
| C  | 1.377915000  | 1.124309000  | 0.195322000  |
| C  | 9.400424000  | 1.383140000  | -0.374246000 |
| H  | 9.422919000  | 1.267721000  | -1.464741000 |
| H  | 10.388225000 | 1.105220000  | 0.009112000  |
| H  | 9.247339000  | 2.447324000  | -0.157027000 |
| C  | 8.301223000  | 0.526793000  | 0.250508000  |
| H  | 8.501895000  | -0.534550000 | 0.046579000  |
| H  | 8.327182000  | 0.636005000  | 1.344049000  |
| C  | 6.902696000  | 0.881298000  | -0.257929000 |
| H  | 6.875788000  | 0.770600000  | -1.352292000 |
| H  | 6.702396000  | 1.944233000  | -0.055377000 |
| C  | 5.796410000  | 0.028859000  | 0.365202000  |

|   |             |              |              |
|---|-------------|--------------|--------------|
| H | 5.821016000 | 0.142777000  | 1.459019000  |
| H | 5.998460000 | -1.033724000 | 0.165819000  |
| C | 4.397255000 | 0.379403000  | -0.148120000 |
| H | 4.368557000 | 0.247398000  | -1.240192000 |
| H | 4.214969000 | 1.447779000  | 0.037344000  |
| C | 3.301993000 | -0.475627000 | 0.495904000  |
| H | 3.271774000 | -0.294558000 | 1.581142000  |
| H | 3.566498000 | -1.534955000 | 0.377492000  |
| C | 1.878195000 | -0.301458000 | -0.076188000 |
| C | 0.895785000 | -1.357993000 | 0.475703000  |
| H | 1.201566000 | 1.274232000  | 1.267692000  |
| H | 2.077077000 | 1.886389000  | -0.157334000 |
| H | 1.956871000 | -0.422192000 | -1.170299000 |
| H | 1.281189000 | -2.361922000 | 0.251219000  |
| H | 0.891464000 | -1.295861000 | 1.582833000  |

88

**D',  $E_{(\text{SCF Done})} = -2341.378307$  a.u.**

|    |              |              |              |
|----|--------------|--------------|--------------|
| C  | -3.332207000 | -2.181889000 | -0.686782000 |
| C  | -2.653287000 | -2.897850000 | 0.347524000  |
| C  | -2.784250000 | -2.152364000 | 1.555907000  |
| C  | -3.536540000 | -0.972008000 | 1.265961000  |
| C  | -3.875359000 | -0.993529000 | -0.118702000 |
| C  | -2.055986000 | -4.268839000 | 0.209930000  |
| H  | -1.223817000 | -4.434077000 | 0.902395000  |
| H  | -1.681109000 | -4.449482000 | -0.801612000 |
| H  | -2.808493000 | -5.040320000 | 0.421204000  |
| C  | -2.410915000 | -2.616577000 | 2.935948000  |
| H  | -3.309096000 | -2.922008000 | 3.488869000  |
| H  | -1.920903000 | -1.840951000 | 3.536859000  |
| H  | -1.754424000 | -3.491300000 | 2.906370000  |
| C  | -4.038850000 | 0.004425000  | 2.290241000  |
| H  | -4.193404000 | 1.005277000  | 1.873630000  |
| H  | -3.361188000 | 0.088544000  | 3.147229000  |
| H  | -5.008154000 | -0.324681000 | 2.688947000  |
| C  | -4.731863000 | 0.007088000  | -0.837567000 |
| H  | -5.775059000 | -0.334120000 | -0.875783000 |
| H  | -4.404229000 | 0.159742000  | -1.871231000 |
| H  | -4.726977000 | 0.982098000  | -0.341502000 |
| C  | -3.581733000 | -2.678536000 | -2.080258000 |
| H  | -4.453283000 | -3.346675000 | -2.094065000 |
| H  | -3.795197000 | -1.858957000 | -2.772587000 |
| H  | -2.735790000 | -3.244878000 | -2.482500000 |
| Sc | -1.440585000 | -0.783324000 | 0.013960000  |
| C  | 6.400988000  | -3.291197000 | -2.539946000 |

|   |              |              |              |
|---|--------------|--------------|--------------|
| H | 7.050135000  | -4.158956000 | -2.382646000 |
| H | 6.491143000  | -2.995894000 | -3.591978000 |
| H | 6.792372000  | -2.468386000 | -1.929300000 |
| C | 4.952989000  | -3.612786000 | -2.177550000 |
| H | 4.602373000  | -4.461054000 | -2.781332000 |
| H | 4.899623000  | -3.941829000 | -1.129809000 |
| C | 4.009164000  | -2.426135000 | -2.383982000 |
| H | 4.059949000  | -2.099774000 | -3.432491000 |
| H | 4.358715000  | -1.573682000 | -1.781932000 |
| C | 2.555306000  | -2.748119000 | -2.024736000 |
| H | 2.498787000  | -3.076135000 | -0.977029000 |
| H | 2.205716000  | -3.593408000 | -2.631637000 |
| C | 1.632364000  | -1.554079000 | -2.245474000 |
| H | 1.656231000  | -1.236198000 | -3.293535000 |
| H | 1.929723000  | -0.698645000 | -1.628565000 |
| S | -0.118042000 | -1.986419000 | -1.888073000 |
| C | -1.041447000 | -0.435151000 | -2.124541000 |
| C | 1.962723000  | 0.246115000  | 1.383544000  |
| H | 2.485542000  | -0.362537000 | 0.637616000  |
| S | 0.496504000  | -0.696622000 | 1.959684000  |
| C | 1.219105000  | -2.338811000 | 2.253086000  |
| H | 1.557778000  | 1.123218000  | 0.865671000  |
| C | 2.898153000  | 0.670145000  | 2.512618000  |
| H | 3.263226000  | -0.215799000 | 3.048044000  |
| H | 2.338094000  | 1.266626000  | 3.244234000  |
| C | 4.094025000  | 1.471244000  | 1.988343000  |
| H | 3.732777000  | 2.359320000  | 1.448489000  |
| H | 4.645932000  | 0.868577000  | 1.252255000  |
| C | 5.049887000  | 1.910230000  | 3.100294000  |
| H | 5.410809000  | 1.022281000  | 3.637585000  |
| H | 4.497111000  | 2.509482000  | 3.837072000  |
| C | 6.240160000  | 2.710923000  | 2.577515000  |
| H | 5.913045000  | 3.624184000  | 2.066105000  |
| H | 6.904185000  | 3.009068000  | 3.395426000  |
| H | 6.833325000  | 2.124679000  | 1.865573000  |
| H | -1.723918000 | -0.519028000 | -2.972679000 |
| H | -0.317382000 | 0.368029000  | -2.317914000 |
| H | 2.024236000  | -2.255685000 | 2.986458000  |
| H | 0.433021000  | -2.971321000 | 2.667679000  |
| H | 1.590775000  | -2.775089000 | 1.323376000  |
| C | -0.733951000 | 2.984893000  | -0.743018000 |
| H | 0.325314000  | 2.883484000  | -0.477146000 |
| S | -1.734912000 | 1.931462000  | 0.374530000  |
| C | -1.297684000 | 2.581246000  | 2.016207000  |

|   |              |             |              |
|---|--------------|-------------|--------------|
| H | -0.875520000 | 2.533926000 | -1.730268000 |
| C | -1.166350000 | 4.448027000 | -0.756220000 |
| H | -1.035310000 | 4.890967000 | 0.239545000  |
| H | -2.236766000 | 4.505903000 | -0.991294000 |
| C | -0.363631000 | 5.261249000 | -1.777267000 |
| H | -0.496346000 | 4.824064000 | -2.777571000 |
| H | 0.709527000  | 5.184826000 | -1.547704000 |
| C | -0.768577000 | 6.736767000 | -1.812041000 |
| H | -0.636458000 | 7.172184000 | -0.811630000 |
| H | -1.840953000 | 6.811716000 | -2.039233000 |
| C | 0.028688000  | 7.546398000 | -2.831955000 |
| H | -0.112304000 | 7.157220000 | -3.847351000 |
| H | -0.283317000 | 8.595998000 | -2.833090000 |
| H | 1.102524000  | 7.519470000 | -2.610999000 |
| H | -1.706012000 | 3.586701000 | 2.137189000  |
| H | -1.752009000 | 1.924723000 | 2.760687000  |
| H | -0.214645000 | 2.598317000 | 2.164036000  |

91

**E', E<sub>(SCF Done)</sub> = -2020.535837 a.u.**

|   |              |              |              |
|---|--------------|--------------|--------------|
| C | 2.645750000  | 1.188340000  | 1.729026000  |
| C | 1.768633000  | 2.294994000  | 1.519290000  |
| C | 0.661472000  | 2.155506000  | 2.407431000  |
| C | 0.853004000  | 0.959599000  | 3.163574000  |
| C | 2.086041000  | 0.373539000  | 2.758524000  |
| C | 2.063239000  | 3.488599000  | 0.658520000  |
| H | 1.153839000  | 4.026011000  | 0.372363000  |
| H | 2.601376000  | 3.220129000  | -0.256940000 |
| H | 2.697500000  | 4.204551000  | 1.198744000  |
| C | -0.413516000 | 3.180550000  | 2.632913000  |
| H | -0.077996000 | 3.929610000  | 3.362286000  |
| H | -1.333873000 | 2.742901000  | 3.032156000  |
| H | -0.671869000 | 3.727213000  | 1.719228000  |
| C | -0.015774000 | 0.457622000  | 4.280900000  |
| H | -0.136929000 | -0.631175000 | 4.253686000  |
| H | -1.014001000 | 0.905926000  | 4.261532000  |
| H | 0.423310000  | 0.707872000  | 5.255664000  |
| C | 2.759059000  | -0.778036000 | 3.442608000  |
| H | 3.395432000  | -0.411449000 | 4.259367000  |
| H | 3.407489000  | -1.349763000 | 2.771349000  |
| H | 2.038663000  | -1.472299000 | 3.885762000  |
| C | 4.005001000  | 1.027044000  | 1.110040000  |
| H | 4.039323000  | 1.393557000  | 0.078571000  |
| H | 4.756316000  | 1.595152000  | 1.675170000  |
| H | 4.335350000  | -0.015770000 | 1.102668000  |

|    |               |               |               |
|----|---------------|---------------|---------------|
| Sc | 0. 572266000  | 0. 272114000  | 0. 816658000  |
| C  | 7. 540825000  | -3. 736715000 | -2. 335371000 |
| H  | 8. 173368000  | -3. 609154000 | -3. 220158000 |
| H  | 8. 097015000  | -3. 354202000 | -1. 471154000 |
| H  | 7. 392592000  | -4. 812690000 | -2. 185542000 |
| C  | 6. 207166000  | -3. 012059000 | -2. 501948000 |
| H  | 6. 389467000  | -1. 943717000 | -2. 686482000 |
| H  | 5. 690131000  | -3. 393225000 | -3. 393649000 |
| C  | 5. 291445000  | -3. 165267000 | -1. 285553000 |
| H  | 5. 806034000  | -2. 782416000 | -0. 392106000 |
| H  | 5. 108100000  | -4. 233226000 | -1. 100580000 |
| C  | 3. 950299000  | -2. 442991000 | -1. 452524000 |
| H  | 3. 431473000  | -2. 836267000 | -2. 337117000 |
| H  | 4. 131389000  | -1. 374848000 | -1. 635704000 |
| C  | 3. 063177000  | -2. 608635000 | -0. 223998000 |
| H  | 3. 522761000  | -2. 160938000 | 0. 661457000  |
| H  | 2. 874670000  | -3. 667158000 | -0. 015478000 |
| S  | 1. 407916000  | -1. 848781000 | -0. 477153000 |
| C  | 0. 548751000  | -1. 912562000 | 1. 118640000  |
| C  | -8. 397127000 | -4. 971658000 | -0. 526716000 |
| H  | -9. 015203000 | -4. 350047000 | 0. 132368000  |
| H  | -8. 736024000 | -6. 007721000 | -0. 419440000 |
| H  | -8. 598257000 | -4. 661583000 | -1. 559304000 |
| C  | -6. 914761000 | -4. 835442000 | -0. 186380000 |
| H  | -6. 739616000 | -5. 186723000 | 0. 840381000  |
| H  | -6. 325668000 | -5. 495678000 | -0. 838606000 |
| C  | -6. 399138000 | -3. 401483000 | -0. 322853000 |
| H  | -6. 988040000 | -2. 740382000 | 0. 329948000  |
| H  | -6. 573382000 | -3. 049119000 | -1. 350287000 |
| C  | -4. 914819000 | -3. 258894000 | 0. 017488000  |
| H  | -4. 324286000 | -3. 916418000 | -0. 637213000 |
| H  | -4. 740687000 | -3. 611370000 | 1. 044550000  |
| C  | -4. 406535000 | -1. 822304000 | -0. 117530000 |
| H  | -4. 988978000 | -1. 159215000 | 0. 535960000  |
| H  | -4. 569520000 | -1. 469527000 | -1. 145537000 |
| C  | -2. 910635000 | -1. 694196000 | 0. 237519000  |
| H  | -2. 338957000 | -2. 355392000 | -0. 429754000 |
| H  | -2. 740185000 | -2. 031670000 | 1. 266677000  |
| C  | -2. 438851000 | -0. 290317000 | 0. 065108000  |
| C  | -2. 025389000 | 0. 535885000  | 1. 048421000  |
| H  | -2. 497236000 | 0. 103564000  | -0. 951475000 |
| H  | -1. 868416000 | 1. 597905000  | 0. 858507000  |
| H  | -2. 021750000 | 0. 212159000  | 2. 089819000  |
| C  | -3. 633757000 | 6. 613811000  | -2. 054936000 |



|   |              |              |              |
|---|--------------|--------------|--------------|
| H | -4.591617000 | 6.924952000  | -1.625298000 |
| H | -2.883007000 | 7.360043000  | -1.769002000 |
| H | -3.733899000 | 6.643622000  | -3.146274000 |
| C | -3.241504000 | 5.219028000  | -1.572895000 |
| H | -3.185207000 | 5.212257000  | -0.474861000 |
| H | -4.028331000 | 4.501218000  | -1.844144000 |
| C | -1.906260000 | 4.745176000  | -2.150842000 |
| H | -1.116328000 | 5.459771000  | -1.878156000 |
| H | -1.961708000 | 4.752231000  | -3.248572000 |
| C | -1.512898000 | 3.342290000  | -1.675240000 |
| H | -2.294970000 | 2.627606000  | -1.964637000 |
| H | -1.461236000 | 3.336926000  | -0.577834000 |
| C | -0.174121000 | 2.906556000  | -2.257576000 |
| H | 0.635527000  | 3.563610000  | -1.925207000 |
| H | -0.209861000 | 2.935754000  | -3.352452000 |
| S | 0.263200000  | 1.174969000  | -1.829081000 |
| C | 1.809110000  | 1.013061000  | -2.768184000 |
| H | 2.564933000  | 1.717612000  | -2.412235000 |
| H | 2.166460000  | -0.009391000 | -2.640532000 |
| H | 1.601277000  | 1.190898000  | -3.826662000 |
| H | 1.220484000  | -2.302231000 | 1.887759000  |
| H | -0.329998000 | -2.557934000 | 1.041604000  |

91

**TS2',  $E_{(\text{SCF Done})} = -2020.521341$  a.u., IF =  $i249.1046$  cm<sup>-1</sup>**

|   |              |              |             |
|---|--------------|--------------|-------------|
| C | -0.883499000 | 1.147565000  | 2.547396000 |
| C | -0.741626000 | -0.189992000 | 3.023685000 |
| C | 0.648076000  | -0.446057000 | 3.225011000 |
| C | 1.364274000  | 0.735003000  | 2.875033000 |
| C | 0.421535000  | 1.718452000  | 2.451860000 |
| C | -1.876243000 | -1.089910000 | 3.419950000 |
| H | -1.599485000 | -2.148171000 | 3.387248000 |
| H | -2.758556000 | -0.949104000 | 2.786899000 |
| H | -2.190496000 | -0.879026000 | 4.451154000 |
| C | 1.239046000  | -1.688901000 | 3.824117000 |
| H | 1.331999000  | -1.588113000 | 4.913668000 |
| H | 2.240236000  | -1.901488000 | 3.435661000 |
| H | 0.618310000  | -2.571609000 | 3.639289000 |
| C | 2.833499000  | 0.970009000  | 3.069406000 |
| H | 3.264419000  | 1.610907000  | 2.292309000 |
| H | 3.403844000  | 0.036702000  | 3.088553000 |
| H | 3.014570000  | 1.472422000  | 4.029127000 |
| C | 0.750855000  | 3.152890000  | 2.147977000 |
| H | 0.807364000  | 3.738001000  | 3.075620000 |
| H | -0.004680000 | 3.634626000  | 1.519551000 |

|    |               |               |               |
|----|---------------|---------------|---------------|
| H  | 1. 719956000  | 3. 263499000  | 1. 648676000  |
| C  | -2. 191303000 | 1. 864906000  | 2. 375050000  |
| H  | -2. 958420000 | 1. 233407000  | 1. 913893000  |
| H  | -2. 584322000 | 2. 183160000  | 3. 350071000  |
| H  | -2. 091986000 | 2. 767480000  | 1. 765928000  |
| Sc | 0. 318305000  | -0. 103038000 | 0. 807996000  |
| C  | -5. 623396000 | 5. 547616000  | -1. 765794000 |
| H  | -6. 707913000 | 5. 540985000  | -1. 916995000 |
| H  | -5. 421151000 | 6. 088780000  | -0. 833752000 |
| H  | -5. 177199000 | 6. 120875000  | -2. 587020000 |
| C  | -5. 066015000 | 4. 126956000  | -1. 714932000 |
| H  | -5. 557372000 | 3. 567312000  | -0. 906435000 |
| H  | -5. 314001000 | 3. 600526000  | -2. 647109000 |
| C  | -3. 550553000 | 4. 091217000  | -1. 504922000 |
| H  | -3. 299886000 | 4. 617262000  | -0. 572234000 |
| H  | -3. 057776000 | 4. 648243000  | -2. 314487000 |
| C  | -2. 989923000 | 2. 665700000  | -1. 455441000 |
| H  | -3. 234822000 | 2. 142906000  | -2. 389471000 |
| H  | -3. 474109000 | 2. 109128000  | -0. 641768000 |
| C  | -1. 477770000 | 2. 663600000  | -1. 253223000 |
| H  | -1. 195531000 | 3. 140016000  | -0. 310859000 |
| H  | -0. 973099000 | 3. 186531000  | -2. 072479000 |
| S  | -0. 825395000 | 0. 939768000  | -1. 276073000 |
| C  | 0. 978121000  | 1. 071599000  | -1. 122654000 |
| C  | 2. 357373000  | -0. 509597000 | -0. 818015000 |
| C  | 2. 198079000  | -1. 265527000 | 0. 375983000  |
| C  | -0. 765308000 | -3. 833827000 | 0. 785019000  |
| H  | -1. 310320000 | -3. 788434000 | 1. 730708000  |
| H  | -1. 100746000 | -4. 691698000 | 0. 198561000  |
| S  | -0. 996715000 | -2. 309388000 | -0. 176837000 |
| C  | -2. 822158000 | -2. 173420000 | -0. 259835000 |
| H  | -3. 215576000 | -2. 228412000 | 0. 761174000  |
| H  | -3. 002647000 | -1. 160608000 | -0. 635333000 |
| H  | 1. 249328000  | 1. 944098000  | -0. 506183000 |
| H  | 1. 414784000  | 1. 191977000  | -2. 110029000 |
| C  | -3. 471965000 | -3. 210223000 | -1. 171273000 |
| H  | -3. 258478000 | -4. 222279000 | -0. 803584000 |
| H  | -3. 031749000 | -3. 137874000 | -2. 173830000 |
| C  | -4. 989525000 | -3. 014440000 | -1. 251005000 |
| H  | -5. 208351000 | -2. 002075000 | -1. 621244000 |
| H  | -5. 421939000 | -3. 073214000 | -0. 241389000 |
| C  | -5. 674581000 | -4. 042371000 | -2. 154555000 |
| H  | -5. 454862000 | -5. 053188000 | -1. 783589000 |
| H  | -5. 239735000 | -3. 984926000 | -3. 162037000 |

|   |              |              |              |
|---|--------------|--------------|--------------|
| C | -7.186438000 | -3.845273000 | -2.236888000 |
| H | -7.647064000 | -4.594731000 | -2.888937000 |
| H | -7.654151000 | -3.932377000 | -1.248882000 |
| H | -7.438084000 | -2.856347000 | -2.638500000 |
| H | 0.303003000  | -3.942868000 | 0.984906000  |
| H | 2.937959000  | -1.116413000 | 1.160268000  |
| H | 1.864742000  | -2.298907000 | 0.265110000  |
| H | 2.009318000  | -0.983804000 | -1.735866000 |
| C | 3.599875000  | 0.340834000  | -0.985012000 |
| H | 3.810556000  | 0.874596000  | -0.048954000 |
| H | 3.474361000  | 1.099120000  | -1.766846000 |
| C | 4.808375000  | -0.539236000 | -1.349844000 |
| H | 4.583133000  | -1.102335000 | -2.266837000 |
| H | 4.967506000  | -1.285097000 | -0.560315000 |
| C | 6.085273000  | 0.278569000  | -1.555029000 |
| H | 5.919475000  | 1.022789000  | -2.347766000 |
| H | 6.303416000  | 0.849437000  | -0.640256000 |
| C | 7.296694000  | -0.583331000 | -1.914908000 |
| H | 7.462300000  | -1.328215000 | -1.122476000 |
| H | 7.078214000  | -1.155160000 | -2.828893000 |
| C | 8.577186000  | 0.227971000  | -2.120925000 |
| H | 8.794361000  | 0.800000000  | -1.207621000 |
| H | 8.410969000  | 0.971636000  | -2.913193000 |
| C | 9.782426000  | -0.638637000 | -2.479123000 |
| H | 10.682190000 | -0.030064000 | -2.620271000 |
| H | 9.995884000  | -1.369012000 | -1.689246000 |
| H | 9.609371000  | -1.196012000 | -3.407680000 |

91

**G,  $E_{(\text{SCF Done})} = -2020.556517$  a.u.**

|   |              |              |              |
|---|--------------|--------------|--------------|
| C | -2.597070000 | -1.182808000 | 1.856655000  |
| C | -2.513814000 | -2.436568000 | 1.179049000  |
| C | -1.407046000 | -3.155801000 | 1.720855000  |
| C | -0.806466000 | -2.352567000 | 2.734009000  |
| C | -1.540225000 | -1.130035000 | 2.814358000  |
| C | -3.511415000 | -2.951302000 | 0.181089000  |
| H | -3.087266000 | -3.722317000 | -0.470355000 |
| H | -3.914042000 | -2.155159000 | -0.455085000 |
| H | -4.368768000 | -3.408493000 | 0.693028000  |
| C | -0.995370000 | -4.558587000 | 1.377822000  |
| H | -1.373225000 | -5.264484000 | 2.129187000  |
| H | 0.093669000  | -4.677932000 | 1.352125000  |
| H | -1.394544000 | -4.883230000 | 0.411988000  |
| C | 0.285495000  | -2.789688000 | 3.663647000  |
| H | 0.816659000  | -1.939332000 | 4.101706000  |

|    |              |              |              |
|----|--------------|--------------|--------------|
| H  | 1.027288000  | -3.421325000 | 3.164833000  |
| H  | -0.132088000 | -3.372426000 | 4.495713000  |
| C  | -1.291536000 | -0.039405000 | 3.816496000  |
| H  | -1.676155000 | -0.326851000 | 4.803837000  |
| H  | -1.791318000 | 0.894151000  | 3.541211000  |
| H  | -0.223702000 | 0.173551000  | 3.943670000  |
| C  | -3.687826000 | -0.167096000 | 1.665983000  |
| H  | -4.598048000 | -0.475292000 | 2.197453000  |
| H  | -3.409866000 | 0.815703000  | 2.057529000  |
| H  | -3.967586000 | -0.039840000 | 0.613464000  |
| Sc | -0.483033000 | -1.176637000 | 0.622855000  |
| C  | -3.819434000 | 6.387410000  | 1.823811000  |
| H  | -4.754834000 | 6.815237000  | 1.448240000  |
| H  | -3.982163000 | 6.098381000  | 2.869005000  |
| H  | -3.063154000 | 7.181094000  | 1.812106000  |
| C  | -3.381830000 | 5.193086000  | 0.979104000  |
| H  | -4.174368000 | 4.431147000  | 0.980466000  |
| H  | -3.260200000 | 5.506747000  | -0.067024000 |
| C  | -2.075985000 | 4.564641000  | 1.470812000  |
| H  | -2.194727000 | 4.250412000  | 2.518071000  |
| H  | -1.282811000 | 5.325876000  | 1.467269000  |
| C  | -1.632928000 | 3.368143000  | 0.622586000  |
| H  | -1.508504000 | 3.680368000  | -0.422241000 |
| H  | -2.420438000 | 2.602163000  | 0.631169000  |
| C  | -0.323293000 | 2.774380000  | 1.130856000  |
| H  | -0.402687000 | 2.443979000  | 2.171023000  |
| H  | 0.482948000  | 3.513424000  | 1.066812000  |
| S  | 0.222936000  | 1.360773000  | 0.093527000  |
| C  | 1.982512000  | 1.140795000  | 0.591992000  |
| C  | 9.673016000  | 1.787517000  | -1.705386000 |
| H  | 9.467563000  | 1.661992000  | -2.775521000 |
| H  | 10.732928000 | 1.563448000  | -1.542594000 |
| H  | 9.515765000  | 2.845009000  | -1.460172000 |
| C  | 8.777548000  | 0.884349000  | -0.860161000 |
| H  | 8.983669000  | -0.167899000 | -1.102540000 |
| H  | 9.031406000  | 1.006116000  | 0.202459000  |
| C  | 7.286426000  | 1.163412000  | -1.056651000 |
| H  | 7.031599000  | 1.041031000  | -2.120126000 |
| H  | 7.080405000  | 2.217057000  | -0.815043000 |
| C  | 6.383042000  | 0.263666000  | -0.212174000 |
| H  | 6.636146000  | 0.388588000  | 0.851039000  |
| H  | 6.591090000  | -0.789666000 | -0.451459000 |
| C  | 4.890648000  | 0.539803000  | -0.411842000 |
| H  | 4.635074000  | 0.399515000  | -1.473132000 |

|   |              |              |              |
|---|--------------|--------------|--------------|
| H | 4.698182000  | 1.599007000  | -0.188211000 |
| C | 4.000578000  | -0.362284000 | 0.448076000  |
| H | 4.198190000  | -0.178188000 | 1.515085000  |
| H | 4.283482000  | -1.408918000 | 0.269878000  |
| C | 2.480594000  | -0.255699000 | 0.198958000  |
| C | 1.682154000  | -1.336133000 | 0.957515000  |
| H | 2.040582000  | 1.272714000  | 1.679332000  |
| H | 2.547141000  | 1.941794000  | 0.107293000  |
| H | 2.324029000  | -0.369836000 | -0.886757000 |
| C | -5.537347000 | 1.254936000  | -4.752102000 |
| H | -5.979537000 | 2.255802000  | -4.711308000 |
| H | -5.281509000 | 1.047626000  | -5.797752000 |
| H | -6.309527000 | 0.537570000  | -4.449774000 |
| C | -4.307469000 | 1.159287000  | -3.852145000 |
| H | -3.567031000 | 1.911093000  | -4.159016000 |
| H | -4.588160000 | 1.408388000  | -2.818496000 |
| C | -3.658564000 | -0.226178000 | -3.879327000 |
| H | -3.378223000 | -0.475824000 | -4.912355000 |
| H | -4.395755000 | -0.980952000 | -3.569468000 |
| C | -2.418462000 | -0.322191000 | -2.984674000 |
| H | -2.695643000 | -0.067504000 | -1.950576000 |
| H | -1.675040000 | 0.420020000  | -3.303225000 |
| C | -1.801278000 | -1.716738000 | -3.024221000 |
| H | -1.517945000 | -1.985387000 | -4.047749000 |
| H | -2.495488000 | -2.473858000 | -2.646256000 |
| S | -0.259738000 | -1.780033000 | -2.034282000 |
| C | 0.249176000  | -3.514623000 | -2.230602000 |
| H | 0.486595000  | -3.697632000 | -3.281637000 |
| H | 1.151968000  | -3.662337000 | -1.633405000 |
| H | -0.530731000 | -4.201785000 | -1.895559000 |
| H | 2.050517000  | -2.336226000 | 0.666631000  |
| H | 1.917729000  | -1.251108000 | 2.030996000  |

91

**TS3,  $E_{(\text{SCF Done})} = -2020.520639$  a.u., IF =  $i1250.2509$  cm<sup>-1</sup>**

|   |              |              |             |
|---|--------------|--------------|-------------|
| C | -1.803773000 | 0.424829000  | 2.571084000 |
| C | -2.605266000 | -0.654930000 | 2.090427000 |
| C | -1.927455000 | -1.873435000 | 2.393381000 |
| C | -0.710407000 | -1.547162000 | 3.066708000 |
| C | -0.638172000 | -0.127215000 | 3.181255000 |
| C | -3.991845000 | -0.514910000 | 1.531868000 |
| H | -4.309335000 | -1.405667000 | 0.983163000 |
| H | -4.088784000 | 0.344427000  | 0.859837000 |
| H | -4.715855000 | -0.368209000 | 2.344495000 |
| C | -2.467553000 | -3.262665000 | 2.208308000 |

|    |              |              |              |
|----|--------------|--------------|--------------|
| H  | -3.016670000 | -3.582399000 | 3.103808000  |
| H  | -1.674185000 | -3.999998000 | 2.045716000  |
| H  | -3.166954000 | -3.333117000 | 1.369294000  |
| C  | 0.239335000  | -2.536720000 | 3.676388000  |
| H  | 1.249563000  | -2.131187000 | 3.785300000  |
| H  | 0.314847000  | -3.457021000 | 3.088018000  |
| H  | -0.101091000 | -2.824536000 | 4.679800000  |
| C  | 0.419388000  | 0.650775000  | 3.909845000  |
| H  | 0.115472000  | 0.831632000  | 4.949436000  |
| H  | 0.601242000  | 1.632885000  | 3.459065000  |
| H  | 1.375076000  | 0.118481000  | 3.948971000  |
| C  | -2.204074000 | 1.872523000  | 2.573422000  |
| H  | -2.800493000 | 2.103676000  | 3.466394000  |
| H  | -1.339543000 | 2.543799000  | 2.589904000  |
| H  | -2.819380000 | 2.135209000  | 1.706547000  |
| Sc | -0.528738000 | -0.651794000 | 0.794687000  |
| C  | -2.016368000 | 7.365693000  | -0.467220000 |
| H  | -2.914996000 | 7.822629000  | -0.894639000 |
| H  | -2.054220000 | 7.510656000  | 0.619075000  |
| H  | -1.149772000 | 7.919719000  | -0.846841000 |
| C  | -1.927716000 | 5.884484000  | -0.827224000 |
| H  | -2.825957000 | 5.363462000  | -0.466232000 |
| H  | -1.925862000 | 5.770473000  | -1.920100000 |
| C  | -0.683940000 | 5.206200000  | -0.248563000 |
| H  | -0.683640000 | 5.318369000  | 0.845467000  |
| H  | 0.214701000  | 5.725503000  | -0.611118000 |
| C  | -0.592377000 | 3.720968000  | -0.612865000 |
| H  | -0.587045000 | 3.605930000  | -1.704234000 |
| H  | -1.485744000 | 3.198597000  | -0.244331000 |
| C  | 0.662547000  | 3.076692000  | -0.032243000 |
| H  | 0.693549000  | 3.156434000  | 1.059056000  |
| H  | 1.562259000  | 3.554032000  | -0.436077000 |
| S  | 0.782189000  | 1.308538000  | -0.511389000 |
| C  | 2.514018000  | 0.876050000  | -0.095929000 |
| C  | 10.066649000 | -0.532298000 | -2.405386000 |
| H  | 9.790143000  | -0.782588000 | -3.436853000 |
| H  | 11.060341000 | -0.953081000 | -2.216971000 |
| H  | 10.150663000 | 0.559427000  | -2.340802000 |
| C  | 9.038896000  | -1.068283000 | -1.411231000 |
| H  | 9.004109000  | -2.165166000 | -1.474457000 |
| H  | 9.361277000  | -0.833333000 | -0.386874000 |
| C  | 7.634495000  | -0.506215000 | -1.638612000 |
| H  | 7.311057000  | -0.741935000 | -2.663528000 |
| H  | 7.669377000  | 0.591880000  | -1.576419000 |

|   |              |              |              |
|---|--------------|--------------|--------------|
| C | 6.599819000  | -1.037828000 | -0.645837000 |
| H | 6.921108000  | -0.798270000 | 0.378602000  |
| H | 6.567929000  | -2.135691000 | -0.705326000 |
| C | 5.193177000  | -0.480363000 | -0.877922000 |
| H | 4.864819000  | -0.737103000 | -1.896392000 |
| H | 5.240102000  | 0.617187000  | -0.837002000 |
| C | 4.173779000  | -1.010927000 | 0.133788000  |
| H | 4.442843000  | -0.676652000 | 1.147063000  |
| H | 4.236543000  | -2.107720000 | 0.152289000  |
| C | 2.701055000  | -0.643358000 | -0.141255000 |
| C | 1.747730000  | -1.327498000 | 0.853867000  |
| H | 2.740163000  | 1.258834000  | 0.906969000  |
| H | 3.150360000  | 1.389129000  | -0.821738000 |
| H | 2.468019000  | -0.978274000 | -1.166147000 |
| C | -7.817239000 | -1.936398000 | -3.601623000 |
| H | -8.561794000 | -1.287601000 | -4.074690000 |
| H | -7.654096000 | -2.793533000 | -4.265611000 |
| H | -8.251769000 | -2.315869000 | -2.669022000 |
| C | -6.515716000 | -1.181660000 | -3.341142000 |
| H | -6.123991000 | -0.785101000 | -4.288073000 |
| H | -6.716908000 | -0.309248000 | -2.703460000 |
| C | -5.445866000 | -2.053833000 | -2.680341000 |
| H | -5.241645000 | -2.925181000 | -3.318801000 |
| H | -5.835520000 | -2.451730000 | -1.731902000 |
| C | -4.138951000 | -1.296950000 | -2.420535000 |
| H | -4.337330000 | -0.429652000 | -1.776727000 |
| H | -3.746695000 | -0.905116000 | -3.368089000 |
| C | -3.091347000 | -2.194084000 | -1.769307000 |
| H | -2.849416000 | -3.046368000 | -2.412906000 |
| H | -3.429504000 | -2.573875000 | -0.801376000 |
| S | -1.514996000 | -1.274727000 | -1.534908000 |
| C | -0.376043000 | -2.445164000 | -0.747108000 |
| H | 0.292219000  | -2.900512000 | -1.482874000 |
| H | 0.654323000  | -1.921042000 | 0.053446000  |
| H | -0.928539000 | -3.232147000 | -0.221231000 |
| H | 2.115187000  | -2.332665000 | 1.102684000  |
| H | 1.777158000  | -0.782020000 | 1.812773000  |

91

**H,  $E_{(\text{SCF Done})} = -2020.562265$  a.u.**

|   |              |              |             |
|---|--------------|--------------|-------------|
| C | -1.228419000 | -1.219853000 | 2.393398000 |
| C | -2.391698000 | -1.708529000 | 1.722846000 |
| C | -2.041024000 | -2.929035000 | 1.067035000 |
| C | -0.660948000 | -3.181556000 | 1.314890000 |
| C | -0.158952000 | -2.129508000 | 2.143877000 |

|    |              |              |              |
|----|--------------|--------------|--------------|
| C  | -3.772614000 | -1.132537000 | 1.856769000  |
| H  | -4.431839000 | -1.445578000 | 1.042580000  |
| H  | -3.768966000 | -0.037696000 | 1.880523000  |
| H  | -4.238651000 | -1.471595000 | 2.791574000  |
| C  | -2.980708000 | -3.867303000 | 0.369666000  |
| H  | -3.394599000 | -4.591670000 | 1.083829000  |
| H  | -2.481072000 | -4.441144000 | -0.416810000 |
| H  | -3.831548000 | -3.349355000 | -0.083441000 |
| C  | 0.089988000  | -4.405674000 | 0.874386000  |
| H  | 1.173782000  | -4.258910000 | 0.901104000  |
| H  | -0.178768000 | -4.713511000 | -0.141688000 |
| H  | -0.133055000 | -5.252004000 | 1.537403000  |
| C  | 1.208248000  | -2.066390000 | 2.763572000  |
| H  | 1.213613000  | -2.585988000 | 3.730997000  |
| H  | 1.531215000  | -1.037862000 | 2.957405000  |
| H  | 1.972370000  | -2.548090000 | 2.145170000  |
| C  | -1.184722000 | -0.026835000 | 3.305053000  |
| H  | -1.502350000 | -0.306199000 | 4.318647000  |
| H  | -0.176759000 | 0.390975000  | 3.395489000  |
| H  | -1.854366000 | 0.774995000  | 2.975949000  |
| Sc | -0.769744000 | -1.132278000 | 0.002330000  |
| C  | -2.319609000 | 6.077823000  | 1.993615000  |
| H  | -3.316281000 | 6.511779000  | 1.862211000  |
| H  | -2.187728000 | 5.864575000  | 3.061090000  |
| H  | -1.585453000 | 6.842382000  | 1.713757000  |
| C  | -2.153097000 | 4.815911000  | 1.150183000  |
| H  | -2.925381000 | 4.083794000  | 1.427332000  |
| H  | -2.323243000 | 5.055244000  | 0.091329000  |
| C  | -0.771685000 | 4.176159000  | 1.305835000  |
| H  | -0.599479000 | 3.932451000  | 2.364230000  |
| H  | 0.000331000  | 4.908024000  | 1.028944000  |
| C  | -0.598872000 | 2.914820000  | 0.453490000  |
| H  | -0.756851000 | 3.157975000  | -0.604974000 |
| H  | -1.372733000 | 2.181950000  | 0.725259000  |
| C  | 0.785898000  | 2.301378000  | 0.635615000  |
| H  | 0.956217000  | 1.993943000  | 1.672403000  |
| H  | 1.564515000  | 3.020009000  | 0.357181000  |
| S  | 1.022905000  | 0.851108000  | -0.465289000 |
| C  | 2.754598000  | 0.359720000  | -0.086799000 |
| C  | 10.627221000 | 1.748092000  | -0.659057000 |
| H  | 10.546336000 | 2.306088000  | -1.599831000 |
| H  | 11.664982000 | 1.411273000  | -0.561492000 |
| H  | 10.427347000 | 2.449474000  | 0.160265000  |
| C  | 9.656026000  | 0.570073000  | -0.628983000 |



|   |              |              |              |
|---|--------------|--------------|--------------|
| H | 9.904280000  | -0.131326000 | -1.438046000 |
| H | 9.785819000  | 0.010603000  | 0.308373000  |
| C | 8.192801000  | 0.995413000  | -0.763211000 |
| H | 8.062058000  | 1.553514000  | -1.702324000 |
| H | 7.944666000  | 1.699386000  | 0.045487000  |
| C | 7.214302000  | -0.179405000 | -0.731379000 |
| H | 7.342518000  | -0.734982000 | 0.209425000  |
| H | 7.464812000  | -0.884594000 | -1.537249000 |
| C | 5.750586000  | 0.245432000  | -0.872356000 |
| H | 5.618015000  | 0.781024000  | -1.824155000 |
| H | 5.518027000  | 0.967851000  | -0.076570000 |
| C | 4.784894000  | -0.941077000 | -0.818563000 |
| H | 4.851250000  | -1.429458000 | 0.165638000  |
| H | 5.112762000  | -1.693227000 | -1.549126000 |
| C | 3.310223000  | -0.617992000 | -1.126159000 |
| C | 2.483394000  | -1.903579000 | -1.190989000 |
| H | 2.798571000  | -0.068787000 | 0.920914000  |
| H | 3.323378000  | 1.294107000  | -0.089964000 |
| H | 3.266944000  | -0.125732000 | -2.108207000 |
| C | -8.760690000 | 1.280022000  | -1.730198000 |
| H | -9.365017000 | 2.170437000  | -1.527286000 |
| H | -8.990256000 | 0.948303000  | -2.749724000 |
| H | -9.088995000 | 0.491681000  | -1.042197000 |
| C | -7.271612000 | 1.575395000  | -1.566107000 |
| H | -6.981295000 | 2.391008000  | -2.242882000 |
| H | -7.078411000 | 1.939514000  | -0.547013000 |
| C | -6.389889000 | 0.355517000  | -1.841966000 |
| H | -6.580938000 | -0.007781000 | -2.861794000 |
| H | -6.678446000 | -0.462318000 | -1.165377000 |
| C | -4.895161000 | 0.651406000  | -1.680307000 |
| H | -4.697838000 | 1.008433000  | -0.660500000 |
| H | -4.606071000 | 1.462822000  | -2.361169000 |
| C | -4.043647000 | -0.580362000 | -1.967103000 |
| H | -4.203264000 | -0.940409000 | -2.989019000 |
| H | -4.270879000 | -1.396292000 | -1.275457000 |
| S | -2.251966000 | -0.185240000 | -1.854508000 |
| C | -1.344466000 | -1.760157000 | -2.018921000 |
| H | -0.724561000 | -1.735240000 | -2.919929000 |
| H | 1.455768000  | -1.724808000 | -1.546287000 |
| H | -2.050939000 | -2.593906000 | -2.084136000 |
| H | 2.919323000  | -2.618061000 | -1.897434000 |
| H | 2.444569000  | -2.397373000 | -0.211410000 |

45

**3a,  $E_{(\text{SCF Done})} = -949.460936$  a.u.**

|   |               |               |               |
|---|---------------|---------------|---------------|
| C | 7. 225397000  | -2. 400638000 | 0. 291835000  |
| H | 8. 255612000  | -2. 375465000 | -0. 081228000 |
| H | 7. 268140000  | -2. 385130000 | 1. 387925000  |
| H | 6. 786585000  | -3. 360425000 | -0. 007734000 |
| C | 6. 408443000  | -1. 227716000 | -0. 245919000 |
| H | 6. 890609000  | -0. 282196000 | 0. 040077000  |
| H | 6. 412531000  | -1. 250181000 | -1. 344901000 |
| C | 4. 961945000  | -1. 225523000 | 0. 251838000  |
| H | 4. 957117000  | -1. 202343000 | 1. 351806000  |
| H | 4. 478477000  | -2. 171245000 | -0. 035165000 |
| C | 4. 141801000  | -0. 050531000 | -0. 285753000 |
| H | 4. 140367000  | -0. 074244000 | -1. 383986000 |
| H | 4. 619187000  | 0. 895181000  | 0. 004567000  |
| C | 2. 701428000  | -0. 064667000 | 0. 220863000  |
| H | 2. 685152000  | -0. 015811000 | 1. 317234000  |
| H | 2. 202081000  | -0. 994682000 | -0. 080721000 |
| S | 1. 775523000  | 1. 355586000  | -0. 454004000 |
| C | 0. 146056000  | 1. 046182000  | 0. 316315000  |
| C | -6. 896039000 | -2. 856500000 | -0. 254808000 |
| H | -6. 900008000 | -2. 899699000 | -1. 351008000 |
| H | -7. 926318000 | -3. 007473000 | 0. 087444000  |
| H | -6. 298364000 | -3. 702787000 | 0. 106000000  |
| C | -6. 329795000 | -1. 528368000 | 0. 243294000  |
| H | -6. 968703000 | -0. 703835000 | -0. 104200000 |
| H | -6. 371088000 | -1. 500794000 | 1. 341673000  |
| C | -4. 891650000 | -1. 277124000 | -0. 212867000 |
| H | -4. 850157000 | -1. 304294000 | -1. 312188000 |
| H | -4. 252269000 | -2. 103059000 | 0. 133794000  |
| C | -4. 316969000 | 0. 050645000  | 0. 282551000  |
| H | -4. 355823000 | 0. 075561000  | 1. 382012000  |
| H | -4. 959250000 | 0. 875411000  | -0. 060923000 |
| C | -2. 880064000 | 0. 304698000  | -0. 178216000 |
| H | -2. 843955000 | 0. 293284000  | -1. 277869000 |
| H | -2. 249574000 | -0. 531195000 | 0. 155524000  |
| C | -2. 318083000 | 1. 634070000  | 0. 331109000  |
| H | -2. 298016000 | 1. 628290000  | 1. 432032000  |
| H | -3. 016001000 | 2. 436147000  | 0. 049653000  |
| C | -0. 923625000 | 2. 019567000  | -0. 195854000 |
| C | -0. 597835000 | 3. 468069000  | 0. 180207000  |
| H | 0. 238280000  | 1. 137008000  | 1. 407551000  |
| H | -0. 138787000 | 0. 013201000  | 0. 087538000  |
| H | -0. 945415000 | 1. 943911000  | -1. 293588000 |
| H | 0. 375653000  | 3. 781848000  | -0. 210370000 |
| H | -1. 357514000 | 4. 152353000  | -0. 215492000 |

H -0.572992000 3.590302000 1.271031000

19

**2b,  $E_{(\text{SCF Done})} = -273.775586$  a.u.**

C -1.211885000 -0.187319000 0.553399000

H -1.031278000 0.817012000 0.956260000

H -1.094090000 -0.889006000 1.393772000

C -2.608670000 -0.283913000 0.015181000

C -3.485700000 0.719123000 -0.034714000

H -2.901921000 -1.261975000 -0.372849000

H -4.484341000 0.587666000 -0.443887000

H -3.238209000 1.712116000 0.337065000

C -0.142353000 -0.512916000 -0.509401000

H -0.226184000 0.201635000 -1.337923000

H -0.360780000 -1.506690000 -0.930746000

C 1.250610000 -0.496699000 0.047176000

H 1.455644000 -1.213115000 0.847124000

C 2.228651000 0.322954000 -0.347391000

H 2.019434000 1.039775000 -1.144681000

C 3.617595000 0.345374000 0.213039000

H 4.365391000 0.142104000 -0.565646000

H 3.862662000 1.330881000 0.632078000

H 3.744186000 -0.400028000 1.005694000

65

**I,  $E_{(\text{SCF Done})} = -1344.862331$  a.u.**

C -2.179408000 -2.016651000 0.797322000

C -1.430779000 -1.135012000 1.639068000

C -2.146533000 0.098715000 1.732541000

C -3.322660000 -0.012949000 0.933199000

C -3.336679000 -1.318215000 0.346603000

C -0.196219000 -1.489531000 2.420252000

H 0.478924000 -0.636405000 2.547674000

H 0.372494000 -2.297946000 1.950615000

H -0.465388000 -1.835653000 3.426934000

C -1.782494000 1.253679000 2.621399000

H -2.191056000 1.101948000 3.629323000

H -2.186566000 2.204388000 2.258515000

H -0.699494000 1.369186000 2.733970000

C -4.426789000 1.001538000 0.833797000

H -4.945420000 0.965030000 -0.130268000

H -4.071809000 2.025778000 0.987914000

H -5.186405000 0.813399000 1.603858000

C -4.430677000 -1.885506000 -0.511321000

H -5.193763000 -2.374035000 0.108900000

H -4.054424000 -2.635148000 -1.213812000

|    |              |              |              |
|----|--------------|--------------|--------------|
| H  | -4.943988000 | -1.113696000 | -1.094508000 |
| C  | -1.874132000 | -3.462500000 | 0.542448000  |
| H  | -2.299345000 | -4.085275000 | 1.340556000  |
| H  | -2.301174000 | -3.812450000 | -0.401684000 |
| H  | -0.798903000 | -3.668047000 | 0.521034000  |
| Sc | -1.409318000 | -0.159867000 | -0.568283000 |
| C  | 6.305568000  | -3.043719000 | 0.947242000  |
| H  | 7.245439000  | -2.612624000 | 1.307573000  |
| H  | 5.847654000  | -3.587339000 | 1.782309000  |
| H  | 6.552865000  | -3.775678000 | 0.169328000  |
| C  | 5.372695000  | -1.959958000 | 0.411829000  |
| H  | 5.172411000  | -1.222516000 | 1.201989000  |
| H  | 5.872044000  | -1.412094000 | -0.399289000 |
| C  | 4.045337000  | -2.520901000 | -0.103438000 |
| H  | 3.543133000  | -3.069487000 | 0.706905000  |
| H  | 4.244530000  | -3.256325000 | -0.895792000 |
| C  | 3.109968000  | -1.433545000 | -0.643138000 |
| H  | 3.608729000  | -0.892388000 | -1.457835000 |
| H  | 2.904535000  | -0.698185000 | 0.146741000  |
| C  | 1.799203000  | -2.023368000 | -1.151219000 |
| H  | 1.250287000  | -2.527831000 | -0.350462000 |
| H  | 1.974445000  | -2.743408000 | -1.957416000 |
| S  | 0.725972000  | -0.714384000 | -1.876087000 |
| C  | -0.894234000 | -1.504604000 | -2.201680000 |
| C  | 0.637920000  | 3.023327000  | 0.025012000  |
| H  | 0.108617000  | 3.441030000  | 0.890924000  |
| H  | 0.699021000  | 1.930325000  | 0.185197000  |
| C  | -0.177267000 | 3.285241000  | -1.259657000 |
| H  | 0.350951000  | 2.890146000  | -2.135646000 |
| H  | -0.260544000 | 4.372718000  | -1.398016000 |
| C  | -1.559995000 | 2.724037000  | -1.188105000 |
| C  | -2.098052000 | 1.845407000  | -2.060256000 |
| H  | -0.833430000 | -2.578536000 | -2.002051000 |
| H  | -1.164551000 | -1.349751000 | -3.251655000 |
| H  | -2.178697000 | 3.075979000  | -0.359165000 |
| H  | -3.148631000 | 1.556052000  | -1.994059000 |
| H  | -1.552006000 | 1.525320000  | -2.949044000 |
| C  | 2.025361000  | 3.590569000  | -0.049427000 |
| H  | 2.658457000  | 3.212452000  | -0.854426000 |
| C  | 2.507574000  | 4.515762000  | 0.785464000  |
| H  | 1.861418000  | 4.888242000  | 1.583747000  |
| C  | 3.881902000  | 5.102163000  | 0.724791000  |
| H  | 4.426299000  | 4.922947000  | 1.660914000  |
| H  | 4.468648000  | 4.682389000  | -0.098379000 |

H 3.837159000 6.190959000 0.593546000

65

**TS4,  $E_{(\text{SCF Done})} = -1344.839776$  a.u., IF =  $i272.1821$  cm $^{-1}$**

|    |              |              |              |
|----|--------------|--------------|--------------|
| C  | -1.034450000 | -2.090384000 | 1.169676000  |
| C  | -1.057838000 | -2.796085000 | -0.070234000 |
| C  | 0.269709000  | -3.259151000 | -0.344742000 |
| C  | 1.112265000  | -2.826622000 | 0.719523000  |
| C  | 0.312399000  | -2.089933000 | 1.649675000  |
| C  | -2.276689000 | -3.103562000 | -0.893605000 |
| H  | -3.075790000 | -2.372661000 | -0.737107000 |
| H  | -2.683121000 | -4.087633000 | -0.625477000 |
| H  | -2.058255000 | -3.133293000 | -1.966539000 |
| C  | 0.665691000  | -4.147379000 | -1.487723000 |
| H  | 0.525979000  | -5.202778000 | -1.219410000 |
| H  | 1.716901000  | -4.022828000 | -1.764635000 |
| H  | 0.062395000  | -3.963775000 | -2.382640000 |
| C  | 2.565708000  | -3.160942000 | 0.892115000  |
| H  | 3.129981000  | -2.353615000 | 1.372377000  |
| H  | 3.052481000  | -3.389736000 | -0.060568000 |
| H  | 2.680027000  | -4.047115000 | 1.530192000  |
| C  | 0.782732000  | -1.538719000 | 2.968344000  |
| H  | 0.699611000  | -2.300393000 | 3.754685000  |
| H  | 0.189748000  | -0.678897000 | 3.298449000  |
| H  | 1.833132000  | -1.229370000 | 2.940259000  |
| C  | -2.228069000 | -1.545026000 | 1.899649000  |
| H  | -2.664093000 | -2.316862000 | 2.547582000  |
| H  | -1.970407000 | -0.701172000 | 2.548838000  |
| H  | -3.019834000 | -1.219216000 | 1.217598000  |
| Sc | 0.309642000  | -0.822050000 | -0.388396000 |
| C  | -7.261366000 | 2.851922000  | 0.781157000  |
| H  | -8.271790000 | 2.751890000  | 0.371471000  |
| H  | -7.253742000 | 2.372380000  | 1.767287000  |
| H  | -7.067458000 | 3.920884000  | 0.928837000  |
| C  | -6.227031000 | 2.224195000  | -0.150233000 |
| H  | -6.468424000 | 1.163623000  | -0.307962000 |
| H  | -6.282987000 | 2.701468000  | -1.138260000 |
| C  | -4.798281000 | 2.342864000  | 0.385678000  |
| H  | -4.738555000 | 1.864423000  | 1.374055000  |
| H  | -4.554705000 | 3.403531000  | 0.540805000  |
| C  | -3.760272000 | 1.715664000  | -0.551753000 |
| H  | -3.814247000 | 2.198138000  | -1.536243000 |
| H  | -3.997004000 | 0.654148000  | -0.706526000 |
| C  | -2.347392000 | 1.854496000  | 0.007612000  |
| H  | -2.243466000 | 1.346866000  | 0.971551000  |

|   |              |              |              |
|---|--------------|--------------|--------------|
| H | -2.073382000 | 2.907372000  | 0.131750000  |
| S | -1.125320000 | 1.142341000  | -1.178771000 |
| C | 0.525515000  | 1.409127000  | -0.479895000 |
| C | 3.321521000  | 0.959617000  | -1.028722000 |
| H | 3.503821000  | 0.291842000  | -0.174871000 |
| H | 4.123508000  | 0.723959000  | -1.746029000 |
| C | 2.054708000  | 0.550460000  | -1.753513000 |
| C | 1.845678000  | -0.829246000 | -2.016243000 |
| H | 0.524062000  | 1.268142000  | 0.627552000  |
| H | 0.894796000  | 2.411722000  | -0.676410000 |
| H | 1.692791000  | 1.259491000  | -2.497811000 |
| H | 1.325926000  | -1.103702000 | -2.937309000 |
| H | 2.632702000  | -1.521167000 | -1.714781000 |
| C | 3.488215000  | 2.422533000  | -0.592579000 |
| H | 2.846910000  | 2.648711000  | 0.268165000  |
| H | 3.165561000  | 3.077858000  | -1.417470000 |
| C | 4.913285000  | 2.732009000  | -0.230128000 |
| H | 5.645448000  | 2.633559000  | -1.034372000 |
| C | 5.325174000  | 3.109636000  | 0.983177000  |
| H | 4.583020000  | 3.213565000  | 1.778828000  |
| C | 6.738528000  | 3.426682000  | 1.357540000  |
| H | 6.826950000  | 4.460912000  | 1.714614000  |
| H | 7.084721000  | 2.782570000  | 2.176315000  |
| H | 7.420991000  | 3.299823000  | 0.511202000  |

65

**J, E<sub>(SCF Done)</sub> = -1344.870472 a.u.**

|   |              |             |              |
|---|--------------|-------------|--------------|
| C | 2.715941000  | 2.102696000 | 0.251876000  |
| C | 2.185476000  | 2.678611000 | -0.940988000 |
| C | 0.989008000  | 3.386142000 | -0.595859000 |
| C | 0.778191000  | 3.248528000 | 0.806244000  |
| C | 1.833945000  | 2.434701000 | 1.327752000  |
| C | 2.812755000  | 2.619171000 | -2.306220000 |
| H | 3.404340000  | 1.709522000 | -2.456084000 |
| H | 3.494700000  | 3.467132000 | -2.451577000 |
| H | 2.070674000  | 2.672465000 | -3.110070000 |
| C | 0.143292000  | 4.193357000 | -1.537745000 |
| H | 0.495566000  | 5.232519000 | -1.573828000 |
| H | -0.905931000 | 4.219453000 | -1.228248000 |
| H | 0.180631000  | 3.811898000 | -2.563663000 |
| C | -0.280678000 | 3.934191000 | 1.615036000  |
| H | -0.584487000 | 3.345488000 | 2.486067000  |
| H | -1.178417000 | 4.141441000 | 1.026178000  |
| H | 0.091946000  | 4.896842000 | 1.988959000  |
| C | 2.030853000  | 2.082439000 | 2.775957000  |

|    |               |               |               |
|----|---------------|---------------|---------------|
| H  | 2. 582453000  | 2. 878530000  | 3. 292875000  |
| H  | 2. 609720000  | 1. 161951000  | 2. 908108000  |
| H  | 1. 079884000  | 1. 961887000  | 3. 305798000  |
| C  | 4. 003421000  | 1. 335587000  | 0. 365696000  |
| H  | 4. 840584000  | 2. 021584000  | 0. 550241000  |
| H  | 3. 994163000  | 0. 622899000  | 1. 197342000  |
| H  | 4. 245710000  | 0. 784175000  | -0. 549309000 |
| Sc | 0. 609079000  | 1. 033907000  | -0. 174288000 |
| C  | 5. 236847000  | -5. 420833000 | 0. 544375000  |
| H  | 6. 274015000  | -5. 508979000 | 0. 204993000  |
| H  | 5. 253372000  | -5. 282935000 | 1. 632025000  |
| H  | 4. 737612000  | -6. 374488000 | 0. 336863000  |
| C  | 4. 528091000  | -4. 261570000 | -0. 152237000 |
| H  | 5. 072222000  | -3. 326527000 | 0. 043770000  |
| H  | 4. 557776000  | -4. 412043000 | -1. 240260000 |
| C  | 3. 072988000  | -4. 103017000 | 0. 294572000  |
| H  | 3. 039551000  | -3. 949971000 | 1. 383014000  |
| H  | 2. 527972000  | -5. 036764000 | 0. 097321000  |
| C  | 2. 357880000  | -2. 944134000 | -0. 408585000 |
| H  | 2. 378701000  | -3. 103466000 | -1. 494512000 |
| H  | 2. 904108000  | -2. 009058000 | -0. 214171000 |
| C  | 0. 912693000  | -2. 809626000 | 0. 060927000  |
| H  | 0. 853017000  | -2. 600541000 | 1. 134521000  |
| H  | 0. 350829000  | -3. 727217000 | -0. 141637000 |
| S  | 0. 041606000  | -1. 471883000 | -0. 853052000 |
| C  | -1. 642493000 | -1. 423252000 | -0. 104040000 |
| C  | -3. 779733000 | -0. 101575000 | 0. 075306000  |
| H  | -3. 821376000 | -0. 323616000 | 1. 151361000  |
| H  | -4. 175423000 | 0. 916542000  | -0. 035944000 |
| C  | -2. 304979000 | -0. 066031000 | -0. 379848000 |
| C  | -1. 521236000 | 1. 089054000  | 0. 281146000  |
| H  | -1. 537787000 | -1. 589242000 | 0. 975272000  |
| H  | -2. 201284000 | -2. 256792000 | -0. 536587000 |
| H  | -2. 311181000 | 0. 083946000  | -1. 473233000 |
| H  | -2. 017584000 | 2. 041309000  | 0. 049590000  |
| H  | -1. 599470000 | 0. 987699000  | 1. 382521000  |
| C  | -4. 696239000 | -1. 071798000 | -0. 688846000 |
| H  | -4. 403257000 | -2. 113942000 | -0. 505492000 |
| H  | -4. 572734000 | -0. 894986000 | -1. 769418000 |
| C  | -6. 139362000 | -0. 897744000 | -0. 310636000 |
| H  | -6. 575688000 | 0. 080401000  | -0. 525579000 |
| C  | -6. 899175000 | -1. 833876000 | 0. 264139000  |
| H  | -6. 456537000 | -2. 810638000 | 0. 473900000  |
| C  | -8. 336654000 | -1. 667494000 | 0. 646158000  |

|   |              |              |             |
|---|--------------|--------------|-------------|
| H | -8.970197000 | -2.398061000 | 0.126250000 |
| H | -8.483009000 | -1.835952000 | 1.721266000 |
| H | -8.706523000 | -0.665551000 | 0.405172000 |

65

**K,  $E_{(\text{SCF Done})} = -1344.888590$  a.u.**

|    |              |              |              |
|----|--------------|--------------|--------------|
| C  | 0.457476000  | -2.123287000 | 1.133153000  |
| C  | 0.116171000  | -2.315122000 | -0.239823000 |
| C  | 1.324158000  | -2.296457000 | -0.999686000 |
| C  | 2.409768000  | -2.090367000 | -0.096877000 |
| C  | 1.875025000  | -1.982338000 | 1.224479000  |
| C  | -1.246991000 | -2.624309000 | -0.790596000 |
| H  | -2.048504000 | -2.258159000 | -0.142357000 |
| H  | -1.384929000 | -3.709785000 | -0.884041000 |
| H  | -1.401885000 | -2.201319000 | -1.789746000 |
| C  | 1.424466000  | -2.576425000 | -2.472858000 |
| H  | 1.330947000  | -3.653410000 | -2.664758000 |
| H  | 2.388191000  | -2.267353000 | -2.889633000 |
| H  | 0.633829000  | -2.086132000 | -3.053741000 |
| C  | 3.871051000  | -2.124642000 | -0.445045000 |
| H  | 4.477917000  | -1.553961000 | 0.265270000  |
| H  | 4.078448000  | -1.740271000 | -1.449789000 |
| H  | 4.245026000  | -3.156659000 | -0.420634000 |
| C  | 2.668064000  | -1.905963000 | 2.495216000  |
| H  | 2.920440000  | -2.913884000 | 2.850444000  |
| H  | 2.112580000  | -1.410265000 | 3.296806000  |
| H  | 3.610144000  | -1.364465000 | 2.365463000  |
| C  | -0.486238000 | -2.163938000 | 2.300051000  |
| H  | -0.476115000 | -3.157417000 | 2.767451000  |
| H  | -0.214853000 | -1.443792000 | 3.079494000  |
| H  | -1.520551000 | -1.965842000 | 2.002267000  |
| Sc | 1.041326000  | -0.068437000 | -0.012238000 |
| C  | -7.350702000 | -0.631981000 | -0.399192000 |
| H  | -8.019117000 | -0.923256000 | -1.216061000 |
| H  | -7.263244000 | -1.488366000 | 0.280084000  |
| H  | -7.835716000 | 0.182115000  | 0.152212000  |
| C  | -5.985449000 | -0.203835000 | -0.932255000 |
| H  | -5.541122000 | -1.026541000 | -1.510249000 |
| H  | -6.109838000 | 0.631817000  | -1.634775000 |
| C  | -5.018735000 | 0.212693000  | 0.178690000  |
| H  | -4.892838000 | -0.621874000 | 0.883896000  |
| H  | -5.461540000 | 1.037471000  | 0.755222000  |
| C  | -3.649485000 | 0.645430000  | -0.356027000 |
| H  | -3.771363000 | 1.480147000  | -1.057970000 |
| H  | -3.201055000 | -0.180913000 | -0.923746000 |



|   |              |             |              |
|---|--------------|-------------|--------------|
| C | -2.717160000 | 1.071140000 | 0.773187000  |
| H | -2.565231000 | 0.271493000 | 1.504541000  |
| H | -3.123715000 | 1.942585000 | 1.297779000  |
| S | -1.083245000 | 1.611196000 | 0.124304000  |
| C | -0.407062000 | 2.640858000 | 1.506872000  |
| C | 1.620405000  | 3.344837000 | 0.184120000  |
| H | 0.893180000  | 3.200281000 | -0.627537000 |
| H | 1.638561000  | 4.426919000 | 0.361844000  |
| C | 1.125599000  | 2.634422000 | 1.471218000  |
| C | 1.644856000  | 1.197558000 | 1.668059000  |
| H | -0.774025000 | 2.205493000 | 2.441884000  |
| H | -0.826458000 | 3.646144000 | 1.393472000  |
| C | 3.002336000  | 2.912212000 | -0.336440000 |
| C | 3.048675000  | 1.520567000 | -0.920199000 |
| C | 2.436373000  | 1.088211000 | -2.049055000 |
| H | 3.744359000  | 2.989331000 | 0.465191000  |
| H | 3.313697000  | 3.623247000 | -1.113336000 |
| C | 1.608357000  | 1.894193000 | -3.007928000 |
| H | 0.579153000  | 1.519176000 | -3.094360000 |
| H | 1.561165000  | 2.952542000 | -2.743099000 |
| H | 2.044534000  | 1.815171000 | -4.011547000 |
| H | 3.700653000  | 0.803214000 | -0.416515000 |
| H | 1.434258000  | 3.258582000 | 2.325585000  |
| H | 1.183247000  | 0.783949000 | 2.581020000  |
| H | 2.724445000  | 1.206209000 | 1.875866000  |
| H | 2.655664000  | 0.065101000 | -2.368170000 |

65

**TS5,  $E_{(\text{SCF Done})} = -1344.877298$  a.u.,  $\text{IF} = i297.0203$  cm<sup>-1</sup>**

|   |              |              |              |
|---|--------------|--------------|--------------|
| C | 0.085186000  | -1.997415000 | 0.971098000  |
| C | 0.191180000  | -2.327879000 | -0.413220000 |
| C | 1.578728000  | -2.397460000 | -0.747299000 |
| C | 2.329298000  | -2.108330000 | 0.429448000  |
| C | 1.410622000  | -1.854736000 | 1.489840000  |
| C | -0.938598000 | -2.677128000 | -1.341033000 |
| H | -1.897166000 | -2.281233000 | -0.993326000 |
| H | -1.052155000 | -3.766850000 | -1.414248000 |
| H | -0.775746000 | -2.309676000 | -2.360802000 |
| C | 2.129826000  | -2.851455000 | -2.067249000 |
| H | 2.166972000  | -3.948089000 | -2.109827000 |
| H | 3.150341000  | -2.494766000 | -2.237746000 |
| H | 1.514533000  | -2.523353000 | -2.912131000 |
| C | 3.822174000  | -2.171524000 | 0.566555000  |
| H | 4.198807000  | -1.479646000 | 1.327350000  |
| H | 4.338127000  | -1.950276000 | -0.373196000 |

|    |              |              |              |
|----|--------------|--------------|--------------|
| H  | 4.137006000  | -3.178563000 | 0.870598000  |
| C  | 1.770028000  | -1.642921000 | 2.933283000  |
| H  | 1.878871000  | -2.606975000 | 3.447351000  |
| H  | 1.002237000  | -1.080277000 | 3.475305000  |
| H  | 2.719144000  | -1.110073000 | 3.052407000  |
| C  | -1.173650000 | -1.976727000 | 1.789673000  |
| H  | -1.330343000 | -2.948923000 | 2.275706000  |
| H  | -1.141019000 | -1.228167000 | 2.589335000  |
| H  | -2.060604000 | -1.781628000 | 1.179586000  |
| Sc | 1.075762000  | -0.073797000 | -0.136169000 |
| C  | -7.308525000 | -0.633354000 | -0.226527000 |
| H  | -7.971889000 | -1.082327000 | -0.973003000 |
| H  | -7.225456000 | -1.337015000 | 0.610372000  |
| H  | -7.796740000 | 0.273891000  | 0.148420000  |
| C  | -5.939939000 | -0.318779000 | -0.825997000 |
| H  | -5.492612000 | -1.239909000 | -1.225785000 |
| H  | -6.059656000 | 0.359827000  | -1.681818000 |
| C  | -4.979901000 | 0.311648000  | 0.185510000  |
| H  | -4.858236000 | -0.365260000 | 1.043721000  |
| H  | -5.425798000 | 1.234549000  | 0.583139000  |
| C  | -3.607551000 | 0.631057000  | -0.416601000 |
| H  | -3.725924000 | 1.310183000  | -1.270562000 |
| H  | -3.156307000 | -0.290426000 | -0.808934000 |
| C  | -2.679298000 | 1.269076000  | 0.611118000  |
| H  | -2.520895000 | 0.619677000  | 1.477082000  |
| H  | -3.095071000 | 2.219884000  | 0.962591000  |
| S  | -1.052541000 | 1.692826000  | -0.131772000 |
| C  | -0.369872000 | 2.854904000  | 1.122356000  |
| C  | 1.637766000  | 3.512741000  | -0.318363000 |
| H  | 0.964557000  | 3.192455000  | -1.126443000 |
| H  | 1.621579000  | 4.608050000  | -0.318434000 |
| C  | 1.154272000  | 2.936915000  | 1.027179000  |
| C  | 1.832508000  | 1.575323000  | 1.243610000  |
| H  | -0.678291000 | 2.494508000  | 2.109828000  |
| H  | -0.830527000 | 3.832942000  | 0.948473000  |
| C  | 3.039710000  | 2.975237000  | -0.576504000 |
| C  | 3.099089000  | 1.456872000  | -0.467806000 |
| C  | 2.702453000  | 0.567495000  | -1.501031000 |
| H  | 3.737310000  | 3.413173000  | 0.147269000  |
| H  | 3.395073000  | 3.266741000  | -1.573063000 |
| C  | 1.774244000  | 0.952278000  | -2.631800000 |
| H  | 0.686554000  | 0.914995000  | -2.379242000 |
| H  | 1.928565000  | 1.974817000  | -2.998297000 |
| H  | 1.898863000  | 0.268564000  | -3.475552000 |

|   |             |              |              |
|---|-------------|--------------|--------------|
| H | 3.955897000 | 1.087432000  | 0.093625000  |
| H | 1.465905000 | 3.624987000  | 1.826139000  |
| H | 1.155525000 | 0.876115000  | 1.803275000  |
| H | 2.705144000 | 1.653429000  | 1.894791000  |
| H | 3.364594000 | -0.273294000 | -1.683505000 |

65

**L,  $E_{(\text{SCF Done})} = -1344.896210$  a.u.**

|    |              |              |              |
|----|--------------|--------------|--------------|
| C  | -0.126117000 | -2.104228000 | 0.898072000  |
| C  | 0.058734000  | -2.488429000 | -0.463628000 |
| C  | 1.464140000  | -2.586164000 | -0.708534000 |
| C  | 2.149284000  | -2.263250000 | 0.497430000  |
| C  | 1.168100000  | -1.947410000 | 1.486946000  |
| C  | -1.026967000 | -2.838958000 | -1.442874000 |
| H  | -1.974897000 | -2.344863000 | -1.206983000 |
| H  | -1.220896000 | -3.919628000 | -1.431314000 |
| H  | -0.763174000 | -2.578469000 | -2.473927000 |
| C  | 2.103324000  | -3.041312000 | -1.988049000 |
| H  | 2.261373000  | -4.127752000 | -1.974537000 |
| H  | 3.081627000  | -2.576841000 | -2.147144000 |
| H  | 1.482077000  | -2.823887000 | -2.863286000 |
| C  | 3.626620000  | -2.365321000 | 0.730366000  |
| H  | 3.988013000  | -1.619706000 | 1.446181000  |
| H  | 4.196271000  | -2.241575000 | -0.194793000 |
| H  | 3.882125000  | -3.352169000 | 1.138859000  |
| C  | 1.444103000  | -1.660221000 | 2.937077000  |
| H  | 1.459061000  | -2.591927000 | 3.517937000  |
| H  | 0.680250000  | -1.018632000 | 3.390484000  |
| H  | 2.416606000  | -1.179604000 | 3.085240000  |
| C  | -1.433068000 | -2.034875000 | 1.634082000  |
| H  | -1.666253000 | -3.006433000 | 2.090013000  |
| H  | -1.414351000 | -1.303597000 | 2.449659000  |
| H  | -2.270593000 | -1.786522000 | 0.974944000  |
| Sc | 0.961884000  | -0.259661000 | -0.225923000 |
| C  | -7.253293000 | -0.349428000 | -0.171403000 |
| H  | -7.937024000 | -0.797096000 | -0.900018000 |
| H  | -7.189705000 | -1.029619000 | 0.686340000  |
| H  | -7.706513000 | 0.585728000  | 0.177966000  |
| C  | -5.878463000 | -0.102343000 | -0.787983000 |
| H  | -5.466742000 | -1.050768000 | -1.161469000 |
| H  | -5.979715000 | 0.553426000  | -1.663710000 |
| C  | -4.890258000 | 0.524332000  | 0.198430000  |
| H  | -4.787071000 | -0.129494000 | 1.076695000  |
| H  | -5.300585000 | 1.474413000  | 0.569359000  |
| C  | -3.511319000 | 0.776543000  | -0.420156000 |

|   |              |              |              |
|---|--------------|--------------|--------------|
| H | -3.610342000 | 1.432247000  | -1.294566000 |
| H | -3.094948000 | -0.172631000 | -0.785647000 |
| C | -2.554608000 | 1.412955000  | 0.582466000  |
| H | -2.418242000 | 0.786899000  | 1.469253000  |
| H | -2.931728000 | 2.390270000  | 0.903464000  |
| S | -0.917807000 | 1.746245000  | -0.185823000 |
| C | -0.205684000 | 2.965324000  | 0.998794000  |
| C | 1.780419000  | 3.601463000  | -0.548746000 |
| H | 1.135369000  | 3.185728000  | -1.335025000 |
| H | 1.739922000  | 4.690367000  | -0.652831000 |
| C | 1.302413000  | 3.133013000  | 0.840589000  |
| C | 2.142794000  | 1.861116000  | 1.144834000  |
| H | -0.454808000 | 2.626732000  | 2.010772000  |
| H | -0.721281000 | 3.913851000  | 0.816488000  |
| C | 3.197011000  | 3.036367000  | -0.668475000 |
| C | 3.113907000  | 1.612081000  | -0.073910000 |
| C | 2.772221000  | 0.463150000  | -1.054046000 |
| H | 3.884271000  | 3.642068000  | -0.063051000 |
| H | 3.585206000  | 3.045258000  | -1.691654000 |
| C | 2.008467000  | 0.760002000  | -2.339226000 |
| H | 0.885432000  | 0.764734000  | -2.234551000 |
| H | 2.195361000  | 1.741368000  | -2.793699000 |
| H | 2.220988000  | -0.003051000 | -3.094305000 |
| H | 4.080874000  | 1.330239000  | 0.353473000  |
| H | 1.577996000  | 3.900543000  | 1.575581000  |
| H | 1.508769000  | 1.012389000  | 1.491959000  |
| H | 2.758851000  | 2.027895000  | 2.034340000  |
| H | 3.663215000  | -0.123394000 | -1.271276000 |

86

**$\mathbf{I}, E_{(\text{SCF Done})} = -1980.014870 \text{ a.u.}$**

|   |              |              |              |
|---|--------------|--------------|--------------|
| C | -1.627027000 | -2.009739000 | 1.673578000  |
| C | -0.356647000 | -2.619680000 | 1.445129000  |
| C | 0.578879000  | -2.046541000 | 2.356256000  |
| C | -0.113516000 | -1.079116000 | 3.145770000  |
| C | -1.477787000 | -1.070075000 | 2.737433000  |
| C | -0.104384000 | -3.793862000 | 0.544936000  |
| H | 0.951350000  | -3.885045000 | 0.271547000  |
| H | -0.691851000 | -3.747167000 | -0.378399000 |
| H | -0.382682000 | -4.729789000 | 1.048250000  |
| C | 1.991567000  | -2.512567000 | 2.566845000  |
| H | 2.011475000  | -3.368724000 | 3.254054000  |
| H | 2.626682000  | -1.739073000 | 3.009865000  |
| H | 2.468122000  | -2.845729000 | 1.638104000  |
| C | 0.448247000  | -0.291560000 | 4.294433000  |

|    |              |              |              |
|----|--------------|--------------|--------------|
| H  | 0.089678000  | 0.744024000  | 4.301139000  |
| H  | 1.542317000  | -0.267031000 | 4.282983000  |
| H  | 0.152994000  | -0.739639000 | 5.252351000  |
| C  | -2.584334000 | -0.348626000 | 3.445967000  |
| H  | -2.991241000 | -0.978190000 | 4.248805000  |
| H  | -3.420964000 | -0.102905000 | 2.784549000  |
| H  | -2.239905000 | 0.579924000  | 3.911342000  |
| C  | -2.919976000 | -2.433507000 | 1.037057000  |
| H  | -2.789645000 | -2.740304000 | -0.006163000 |
| H  | -3.349141000 | -3.292435000 | 1.570606000  |
| H  | -3.671865000 | -1.639344000 | 1.057830000  |
| Sc | -0.153243000 | -0.254544000 | 0.826106000  |
| C  | -8.161510000 | 0.339969000  | -2.325499000 |
| H  | -8.670206000 | -0.036898000 | -3.219048000 |
| H  | -8.491764000 | -0.267079000 | -1.474046000 |
| H  | -8.506335000 | 1.366752000  | -2.155320000 |
| C  | -6.644463000 | 0.285611000  | -2.490416000 |
| H  | -6.333503000 | -0.748810000 | -2.695184000 |
| H  | -6.348538000 | 0.874384000  | -3.369905000 |
| C  | -5.894133000 | 0.804534000  | -1.261906000 |
| H  | -6.188114000 | 0.215928000  | -0.380567000 |
| H  | -6.203129000 | 1.839419000  | -1.057215000 |
| C  | -4.371354000 | 0.753835000  | -1.426030000 |
| H  | -4.077873000 | 1.353564000  | -2.298131000 |
| H  | -4.060180000 | -0.280182000 | -1.628867000 |
| C  | -3.652578000 | 1.270677000  | -0.185246000 |
| H  | -3.873062000 | 0.652093000  | 0.689092000  |
| H  | -3.948392000 | 2.300928000  | 0.039650000  |
| S  | -1.830521000 | 1.318191000  | -0.428508000 |
| C  | -1.093841000 | 1.708454000  | 1.181839000  |
| C  | 3.403035000  | 3.847163000  | 0.047579000  |
| H  | 4.204628000  | 3.477768000  | 0.702983000  |
| H  | 3.714783000  | 3.641987000  | -0.984617000 |
| C  | 2.108161000  | 3.055265000  | 0.364588000  |
| H  | 1.320521000  | 3.411933000  | -0.312738000 |
| H  | 1.786580000  | 3.263908000  | 1.391553000  |
| C  | 2.315879000  | 1.591834000  | 0.168840000  |
| C  | 2.295876000  | 0.649383000  | 1.133929000  |
| H  | 2.564152000  | 1.284822000  | -0.848987000 |
| H  | 2.630336000  | -0.368005000 | 0.930665000  |
| H  | 2.126172000  | 0.916118000  | 2.177555000  |
| C  | 6.477141000  | -3.942479000 | -2.143976000 |
| H  | 7.479867000  | -3.788204000 | -1.732112000 |
| H  | 6.145596000  | -4.944130000 | -1.845594000 |

|   |              |              |              |
|---|--------------|--------------|--------------|
| H | 6.561808000  | -3.931716000 | -3.236985000 |
| C | 5.509289000  | -2.868313000 | -1.653012000 |
| H | 5.474425000  | -2.879724000 | -0.554134000 |
| H | 5.885940000  | -1.875844000 | -1.937650000 |
| C | 4.093797000  | -3.047509000 | -2.205994000 |
| H | 3.713124000  | -4.038775000 | -1.920514000 |
| H | 4.128229000  | -3.036117000 | -3.304572000 |
| C | 3.121001000  | -1.966979000 | -1.721106000 |
| H | 3.495501000  | -0.979073000 | -2.020693000 |
| H | 3.089087000  | -1.979755000 | -0.623032000 |
| C | 1.720797000  | -2.178905000 | -2.283430000 |
| H | 1.298204000  | -3.131538000 | -1.949515000 |
| H | 1.750495000  | -2.183856000 | -3.378860000 |
| S | 0.558705000  | -0.829359000 | -1.833241000 |
| C | -0.889280000 | -1.338269000 | -2.804411000 |
| H | -1.263272000 | -2.312240000 | -2.479327000 |
| H | -1.661000000 | -0.579975000 | -2.666724000 |
| H | -0.610614000 | -1.378382000 | -3.860784000 |
| H | -0.588556000 | 2.676425000  | 1.134054000  |
| H | -1.871932000 | 1.741097000  | 1.948765000  |
| C | 3.215089000  | 5.323515000  | 0.241101000  |
| H | 2.999823000  | 5.652224000  | 1.260001000  |
| C | 3.296344000  | 6.233129000  | -0.733886000 |
| H | 3.518846000  | 5.893989000  | -1.748285000 |
| C | 3.121715000  | 7.708497000  | -0.556524000 |
| H | 2.901380000  | 7.969483000  | 0.483614000  |
| H | 4.027220000  | 8.250244000  | -0.859296000 |
| H | 2.305657000  | 8.087946000  | -1.185387000 |

86

**TS4',  $E_{(\text{SCF Done})} = -1980.001341$  a.u., IF =  $i260.6422$  cm<sup>-1</sup>**

|   |              |              |             |
|---|--------------|--------------|-------------|
| C | -1.487427000 | -1.669019000 | 1.923839000 |
| C | -0.206530000 | -2.284907000 | 1.788351000 |
| C | 0.740799000  | -1.508687000 | 2.520370000 |
| C | 0.044526000  | -0.412163000 | 3.108229000 |
| C | -1.331624000 | -0.516326000 | 2.749976000 |
| C | 0.046209000  | -3.623595000 | 1.157778000 |
| H | 1.096200000  | -3.759133000 | 0.882082000 |
| H | -0.564977000 | -3.789199000 | 0.264110000 |
| H | -0.201542000 | -4.429897000 | 1.861431000 |
| C | 2.179428000  | -1.866730000 | 2.753411000 |
| H | 2.282387000  | -2.481694000 | 3.657396000 |
| H | 2.811738000  | -0.984523000 | 2.894149000 |
| H | 2.600850000  | -2.445391000 | 1.925319000 |
| C | 0.617045000  | 0.600071000  | 4.057905000 |

|    |              |              |              |
|----|--------------|--------------|--------------|
| H  | 0.211906000  | 1.605994000  | 3.897471000  |
| H  | 1.706475000  | 0.664886000  | 3.983767000  |
| H  | 0.385282000  | 0.327473000  | 5.096086000  |
| C  | -2.433599000 | 0.328082000  | 3.323739000  |
| H  | -2.752438000 | -0.076006000 | 4.293891000  |
| H  | -3.323825000 | 0.353976000  | 2.688099000  |
| H  | -2.120790000 | 1.362451000  | 3.505260000  |
| C  | -2.781979000 | -2.253640000 | 1.435984000  |
| H  | -2.688628000 | -2.704321000 | 0.441800000  |
| H  | -3.126698000 | -3.046544000 | 2.113445000  |
| H  | -3.581242000 | -1.508592000 | 1.388498000  |
| Sc | -0.074640000 | -0.100263000 | 0.666157000  |
| C  | -8.285163000 | -0.447084000 | -1.810672000 |
| H  | -8.860093000 | -1.040722000 | -2.529090000 |
| H  | -8.507974000 | -0.831511000 | -0.808142000 |
| H  | -8.654311000 | 0.584064000  | -1.861298000 |
| C  | -6.789779000 | -0.515491000 | -2.111834000 |
| H  | -6.457288000 | -1.563052000 | -2.089384000 |
| H  | -6.603178000 | -0.156368000 | -3.133485000 |
| C  | -5.948391000 | 0.302436000  | -1.129518000 |
| H  | -6.132823000 | -0.055561000 | -0.106135000 |
| H  | -6.278063000 | 1.350821000  | -1.152925000 |
| C  | -4.447416000 | 0.236481000  | -1.432274000 |
| H  | -4.263528000 | 0.603185000  | -2.450967000 |
| H  | -4.114372000 | -0.810161000 | -1.404146000 |
| C  | -3.634576000 | 1.060728000  | -0.438581000 |
| H  | -3.750030000 | 0.687987000  | 0.582178000  |
| H  | -3.937897000 | 2.112822000  | -0.461147000 |
| S  | -1.847117000 | 1.035769000  | -0.891041000 |
| C  | -0.960340000 | 2.016178000  | 0.336106000  |
| C  | 1.185699000  | 2.186303000  | 0.311156000  |
| C  | 1.887863000  | 1.033195000  | 0.732083000  |
| H  | 2.517422000  | 0.535388000  | -0.008453000 |
| H  | 2.264649000  | 1.001609000  | 1.751182000  |
| C  | 6.971507000  | -3.448518000 | -1.454482000 |
| H  | 7.939563000  | -3.057598000 | -1.124291000 |
| H  | 6.782896000  | -4.377774000 | -0.903757000 |
| H  | 7.061414000  | -3.703724000 | -2.516955000 |
| C  | 5.858294000  | -2.429589000 | -1.221885000 |
| H  | 5.816984000  | -2.166890000 | -0.155190000 |
| H  | 6.092964000  | -1.499329000 | -1.757840000 |
| C  | 4.486135000  | -2.936739000 | -1.670945000 |
| H  | 4.247993000  | -3.866809000 | -1.134660000 |
| H  | 4.526441000  | -3.198665000 | -2.737800000 |

|   |              |              |              |
|---|--------------|--------------|--------------|
| C | 3.368494000  | -1.913058000 | -1.442639000 |
| H | 3.599594000  | -0.991028000 | -1.992526000 |
| H | 3.329674000  | -1.650563000 | -0.377335000 |
| C | 2.016883000  | -2.453409000 | -1.894848000 |
| H | 1.725109000  | -3.337092000 | -1.319133000 |
| H | 2.054438000  | -2.732797000 | -2.953914000 |
| S | 0.677448000  | -1.203135000 | -1.771325000 |
| C | -0.687361000 | -2.114295000 | -2.549753000 |
| H | -0.915897000 | -3.032976000 | -2.004144000 |
| H | -1.561227000 | -1.460527000 | -2.556686000 |
| H | -0.413302000 | -2.351375000 | -3.581168000 |
| H | -0.989431000 | 3.076411000  | 0.097418000  |
| H | -1.393513000 | 1.873776000  | 1.341182000  |
| C | 1.368041000  | 2.711550000  | -1.096186000 |
| H | 1.344355000  | 1.876405000  | -1.808317000 |
| H | 0.559973000  | 3.397169000  | -1.371675000 |
| C | 2.714003000  | 3.461352000  | -1.253203000 |
| H | 3.535888000  | 2.761404000  | -1.047868000 |
| H | 2.802052000  | 3.753467000  | -2.306923000 |
| C | 2.844777000  | 4.677421000  | -0.380993000 |
| H | 2.992795000  | 4.504909000  | 0.687408000  |
| C | 2.808047000  | 5.936816000  | -0.827119000 |
| H | 2.680612000  | 6.106923000  | -1.898814000 |
| C | 2.945705000  | 7.161918000  | 0.020968000  |
| H | 3.811498000  | 7.760252000  | -0.291387000 |
| H | 2.066537000  | 7.812421000  | -0.076381000 |
| H | 3.070668000  | 6.911857000  | 1.079761000  |
| H | 1.021247000  | 2.951865000  | 1.068807000  |

86

**$J'$ ,  $E_{(\text{SCF Done})} = -1980.035852$  a.u.**

|   |              |              |              |
|---|--------------|--------------|--------------|
| C | -2.065241000 | -1.909210000 | 1.573398000  |
| C | -1.050366000 | -2.823001000 | 1.157522000  |
| C | 0.148592000  | -2.494528000 | 1.856812000  |
| C | -0.123422000 | -1.384270000 | 2.712452000  |
| C | -1.490772000 | -1.021959000 | 2.533752000  |
| C | -1.254690000 | -4.000942000 | 0.248224000  |
| H | -0.333299000 | -4.296581000 | -0.264649000 |
| H | -2.019792000 | -3.811966000 | -0.513031000 |
| H | -1.591145000 | -4.876575000 | 0.819354000  |
| C | 1.441317000  | -3.258019000 | 1.815599000  |
| H | 1.468064000  | -4.009578000 | 2.616001000  |
| H | 2.310708000  | -2.608825000 | 1.964434000  |
| H | 1.579001000  | -3.797152000 | 0.872788000  |
| C | 0.817040000  | -0.811100000 | 3.730063000  |



|    |              |              |              |
|----|--------------|--------------|--------------|
| H  | 0.538784000  | 0.207195000  | 4.015971000  |
| H  | 1.851248000  | -0.781034000 | 3.372214000  |
| H  | 0.807425000  | -1.418480000 | 4.644949000  |
| C  | -2.209427000 | 0.051742000  | 3.298666000  |
| H  | -2.478557000 | -0.302790000 | 4.302358000  |
| H  | -3.141133000 | 0.352745000  | 2.809800000  |
| H  | -1.594196000 | 0.948512000  | 3.432057000  |
| C  | -3.511426000 | -1.973402000 | 1.171102000  |
| H  | -3.643685000 | -2.293818000 | 0.131522000  |
| H  | -4.052848000 | -2.696940000 | 1.795088000  |
| H  | -4.018284000 | -1.011114000 | 1.290781000  |
| Sc | -0.358279000 | -0.587049000 | 0.420876000  |
| C  | -8.379280000 | 1.268185000  | -1.297065000 |
| H  | -9.120015000 | 0.758469000  | -1.921967000 |
| H  | -8.601397000 | 1.023283000  | -0.251540000 |
| H  | -8.524203000 | 2.347493000  | -1.424031000 |
| C  | -6.959868000 | 0.851621000  | -1.675490000 |
| H  | -6.856328000 | -0.238030000 | -1.573042000 |
| H  | -6.779924000 | 1.078366000  | -2.735555000 |
| C  | -5.891618000 | 1.542489000  | -0.824931000 |
| H  | -6.070012000 | 1.317852000  | 0.236811000  |
| H  | -5.992709000 | 2.632235000  | -0.929224000 |
| C  | -4.466764000 | 1.127125000  | -1.205323000 |
| H  | -4.285196000 | 1.352596000  | -2.264067000 |
| H  | -4.361069000 | 0.039739000  | -1.089775000 |
| C  | -3.425309000 | 1.844990000  | -0.353042000 |
| H  | -3.567116000 | 1.651115000  | 0.714535000  |
| H  | -3.477594000 | 2.927482000  | -0.513265000 |
| S  | -1.718505000 | 1.359936000  | -0.829967000 |
| C  | -0.680214000 | 2.719201000  | -0.142925000 |
| C  | 3.145576000  | 3.292050000  | 0.266584000  |
| H  | 3.407823000  | 2.487427000  | 0.969031000  |
| H  | 3.430364000  | 2.943889000  | -0.736383000 |
| C  | 1.628919000  | 3.523589000  | 0.314648000  |
| H  | 1.385853000  | 4.342266000  | -0.377916000 |
| H  | 1.343679000  | 3.868082000  | 1.319888000  |
| C  | 0.786437000  | 2.279498000  | -0.042160000 |
| C  | 0.930082000  | 1.107572000  | 0.948741000  |
| H  | 1.103913000  | 1.954863000  | -1.047270000 |
| H  | 1.976554000  | 0.758046000  | 0.969094000  |
| H  | 0.729327000  | 1.479583000  | 1.966576000  |
| C  | 6.834872000  | -3.459930000 | -0.996578000 |
| H  | 7.751568000  | -3.080473000 | -0.533383000 |
| H  | 6.564343000  | -4.390965000 | -0.484285000 |

|   |              |              |              |
|---|--------------|--------------|--------------|
| H | 7.067998000  | -3.708857000 | -2.038562000 |
| C | 5.709557000  | -2.431459000 | -0.911102000 |
| H | 5.524443000  | -2.174948000 | 0.141744000  |
| H | 6.023376000  | -1.500138000 | -1.402463000 |
| C | 4.407469000  | -2.922394000 | -1.547906000 |
| H | 4.090425000  | -3.854195000 | -1.057443000 |
| H | 4.591195000  | -3.176132000 | -2.601666000 |
| C | 3.279228000  | -1.889130000 | -1.465347000 |
| H | 3.592094000  | -0.960048000 | -1.958789000 |
| H | 3.090287000  | -1.639335000 | -0.412103000 |
| C | 1.998697000  | -2.401970000 | -2.116849000 |
| H | 1.635838000  | -3.315925000 | -1.635765000 |
| H | 2.164013000  | -2.614557000 | -3.178955000 |
| S | 0.678634000  | -1.128111000 | -2.059845000 |
| C | -0.618500000 | -1.878677000 | -3.090751000 |
| H | -0.946925000 | -2.840099000 | -2.689686000 |
| H | -1.458326000 | -1.179773000 | -3.122381000 |
| H | -0.233567000 | -2.007121000 | -4.105704000 |
| H | -0.809091000 | 3.582389000  | -0.803771000 |
| H | -1.075593000 | 2.968688000  | 0.848849000  |
| C | 3.923868000  | 4.528926000  | 0.611163000  |
| H | 3.777889000  | 4.921431000  | 1.620339000  |
| C | 4.754637000  | 5.168405000  | -0.216527000 |
| H | 4.897095000  | 4.770638000  | -1.224197000 |
| C | 5.531140000  | 6.403346000  | 0.119682000  |
| H | 5.333760000  | 6.739457000  | 1.142979000  |
| H | 6.611177000  | 6.231426000  | 0.020992000  |
| H | 5.282349000  | 7.226528000  | -0.563181000 |

86

**TS5'',  $E_{(\text{SCF Done})} = -1980.000374$  a.u., IF =  $i1252.0078$  cm<sup>-1</sup>**

|   |              |              |             |
|---|--------------|--------------|-------------|
| C | -1.321065000 | -1.940103000 | 2.372773000 |
| C | -0.007062000 | -1.686982000 | 2.873472000 |
| C | 0.140682000  | -0.276775000 | 3.027473000 |
| C | -1.076288000 | 0.342471000  | 2.613542000 |
| C | -1.983371000 | -0.686004000 | 2.215682000 |
| C | 0.978532000  | -2.735897000 | 3.299505000 |
| H | 0.931372000  | -3.630454000 | 2.669859000 |
| H | 0.773356000  | -3.057265000 | 4.329140000 |
| H | 2.009773000  | -2.371393000 | 3.277413000 |
| C | 1.323881000  | 0.433467000  | 3.619035000 |
| H | 1.496408000  | 1.413199000  | 3.159052000 |
| H | 2.246865000  | -0.147177000 | 3.525167000 |
| H | 1.169052000  | 0.610903000  | 4.691557000 |
| C | -1.409513000 | 1.802482000  | 2.728468000 |

|    |              |              |              |
|----|--------------|--------------|--------------|
| H  | -2.144599000 | 2.120912000  | 1.982048000  |
| H  | -0.526079000 | 2.440889000  | 2.626465000  |
| H  | -1.844158000 | 2.019805000  | 3.713569000  |
| C  | -3.427805000 | -0.471539000 | 1.866543000  |
| H  | -3.857908000 | -1.327436000 | 1.339559000  |
| H  | -3.581264000 | 0.416287000  | 1.243760000  |
| H  | -4.022595000 | -0.328824000 | 2.778610000  |
| C  | -1.940303000 | -3.299731000 | 2.218156000  |
| H  | -2.369224000 | -3.635724000 | 3.171464000  |
| H  | -2.754472000 | -3.309901000 | 1.486618000  |
| H  | -1.210130000 | -4.058457000 | 1.916849000  |
| Sc | -0.116853000 | -0.704153000 | 0.633209000  |
| C  | -1.465669000 | 7.411344000  | -0.035606000 |
| H  | -2.395995000 | 7.919906000  | -0.309221000 |
| H  | -1.346899000 | 7.497483000  | 1.051117000  |
| H  | -0.638732000 | 7.957119000  | -0.505016000 |
| C  | -1.486620000 | 5.950092000  | -0.478014000 |
| H  | -2.346107000 | 5.439294000  | -0.020874000 |
| H  | -1.640728000 | 5.896278000  | -1.564621000 |
| C  | -0.202505000 | 5.201285000  | -0.114323000 |
| H  | -0.046114000 | 5.253425000  | 0.973032000  |
| H  | 0.657067000  | 5.710363000  | -0.573310000 |
| C  | -0.221182000 | 3.735950000  | -0.560957000 |
| H  | -0.371833000 | 3.680188000  | -1.646549000 |
| H  | -1.074587000 | 3.223326000  | -0.096563000 |
| C  | 1.075820000  | 3.021296000  | -0.194847000 |
| H  | 1.261542000  | 3.042668000  | 0.883832000  |
| H  | 1.928675000  | 3.489775000  | -0.698412000 |
| S  | 1.057410000  | 1.277673000  | -0.769879000 |
| C  | 2.814422000  | 0.773209000  | -0.634552000 |
| C  | 4.420988000  | -1.168918000 | -0.725909000 |
| H  | 4.857477000  | -0.883760000 | 0.241856000  |
| H  | 4.450172000  | -2.266470000 | -0.758488000 |
| C  | 2.937751000  | -0.747768000 | -0.764289000 |
| C  | 2.120219000  | -1.446292000 | 0.335962000  |
| H  | 3.200816000  | 1.105733000  | 0.336750000  |
| H  | 3.354513000  | 1.297290000  | -1.427497000 |
| H  | 2.543915000  | -1.032117000 | -1.754895000 |
| C  | 5.296256000  | -0.622536000 | -1.865624000 |
| H  | 5.401424000  | 0.467284000  | -1.786399000 |
| H  | 4.790841000  | -0.821989000 | -2.824324000 |
| C  | 6.662720000  | -1.245794000 | -1.876080000 |
| H  | 6.695095000  | -2.326291000 | -2.034102000 |
| C  | 7.808640000  | -0.582214000 | -1.701552000 |

|   |              |              |              |
|---|--------------|--------------|--------------|
| H | 7.768553000  | 0.498677000  | -1.546706000 |
| C | 9.173944000  | -1.195316000 | -1.709474000 |
| H | 9.797597000  | -0.759272000 | -2.500906000 |
| H | 9.696967000  | -1.010345000 | -0.761910000 |
| H | 9.131201000  | -2.277681000 | -1.869080000 |
| C | -8.000651000 | -1.580364000 | -2.704378000 |
| H | -8.778840000 | -0.889661000 | -3.045609000 |
| H | -7.968771000 | -2.419143000 | -3.409785000 |
| H | -8.311750000 | -1.976410000 | -1.730247000 |
| C | -6.646142000 | -0.881518000 | -2.612869000 |
| H | -6.378568000 | -0.466664000 | -3.594537000 |
| H | -6.718891000 | -0.025052000 | -1.927755000 |
| C | -5.528380000 | -1.813231000 | -2.139091000 |
| H | -5.452730000 | -2.668804000 | -2.825260000 |
| H | -5.793710000 | -2.229414000 | -1.156186000 |
| C | -4.168561000 | -1.112361000 | -2.049070000 |
| H | -4.238233000 | -0.260523000 | -1.359441000 |
| H | -3.900100000 | -0.703329000 | -3.031846000 |
| C | -3.075563000 | -2.067381000 | -1.580237000 |
| H | -2.960971000 | -2.905325000 | -2.275809000 |
| H | -3.288274000 | -2.467399000 | -0.585098000 |
| S | -1.447169000 | -1.211147000 | -1.547673000 |
| C | -0.250924000 | -2.444644000 | -0.969093000 |
| H | 0.287374000  | -2.895097000 | -1.807302000 |
| H | -0.749747000 | -3.231497000 | -0.391933000 |
| H | 0.902694000  | -1.979664000 | -0.312113000 |
| H | 2.308146000  | -0.942548000 | 1.299714000  |
| H | 2.487652000  | -2.470286000 | 0.489943000  |

86

**$N', E_{(\text{SCF Done})} = -1980.041238 \text{ a.u.}$**

|   |              |              |             |
|---|--------------|--------------|-------------|
| C | -1.371411000 | -2.911186000 | 1.214850000 |
| C | 0.035604000  | -3.020835000 | 1.411001000 |
| C | 0.468996000  | -1.884261000 | 2.163697000 |
| C | -0.671229000 | -1.066511000 | 2.418056000 |
| C | -1.809394000 | -1.695749000 | 1.826189000 |
| C | 0.882125000  | -4.189924000 | 0.994981000 |
| H | 0.598096000  | -4.578038000 | 0.011092000 |
| H | 0.774821000  | -5.015607000 | 1.710756000 |
| H | 1.946236000  | -3.938487000 | 0.958154000 |
| C | 1.849813000  | -1.658460000 | 2.710975000 |
| H | 2.079184000  | -0.594771000 | 2.836654000 |
| H | 2.628338000  | -2.098402000 | 2.079583000 |
| H | 1.949543000  | -2.121734000 | 3.701583000 |
| C | -0.703388000 | 0.171303000  | 3.268391000 |

|    |              |              |              |
|----|--------------|--------------|--------------|
| H  | -1.467974000 | 0.883449000  | 2.940164000  |
| H  | 0.259608000  | 0.692130000  | 3.282201000  |
| H  | -0.938061000 | -0.084868000 | 4.310319000  |
| C  | -3.232100000 | -1.242906000 | 1.991880000  |
| H  | -3.891556000 | -1.665524000 | 1.228851000  |
| H  | -3.331710000 | -0.153065000 | 1.951895000  |
| H  | -3.624909000 | -1.565095000 | 2.965456000  |
| C  | -2.246247000 | -3.966604000 | 0.606114000  |
| H  | -2.573385000 | -4.679716000 | 1.374516000  |
| H  | -3.152440000 | -3.551685000 | 0.153923000  |
| H  | -1.722103000 | -4.541241000 | -0.163564000 |
| Sc | -0.320116000 | -1.063707000 | 0.007548000  |
| C  | -2.396847000 | 6.042277000  | 1.755007000  |
| H  | -3.435092000 | 6.376737000  | 1.659580000  |
| H  | -2.191775000 | 5.894222000  | 2.821966000  |
| H  | -1.752498000 | 6.855931000  | 1.401993000  |
| C  | -2.155961000 | 4.761133000  | 0.959867000  |
| H  | -2.841327000 | 3.976145000  | 1.311069000  |
| H  | -2.401358000 | 4.931994000  | -0.097476000 |
| C  | -0.714736000 | 4.258109000  | 1.067066000  |
| H  | -0.466905000 | 4.082892000  | 2.123990000  |
| H  | -0.029404000 | 5.042580000  | 0.716075000  |
| C  | -0.468830000 | 2.977607000  | 0.262531000  |
| H  | -0.701571000 | 3.153893000  | -0.795378000 |
| H  | -1.157719000 | 2.192564000  | 0.607899000  |
| C  | 0.973770000  | 2.499836000  | 0.395527000  |
| H  | 1.223468000  | 2.259286000  | 1.433934000  |
| H  | 1.668235000  | 3.270630000  | 0.043746000  |
| S  | 1.285381000  | 1.024053000  | -0.651777000 |
| C  | 3.070660000  | 0.703461000  | -0.343753000 |
| C  | 5.179408000  | -0.416808000 | -1.146473000 |
| H  | 5.360944000  | -0.835468000 | -0.146088000 |
| H  | 5.541791000  | -1.170896000 | -1.858066000 |
| C  | 3.664620000  | -0.258413000 | -1.376761000 |
| C  | 2.974093000  | -1.622996000 | -1.342372000 |
| H  | 3.201042000  | 0.319436000  | 0.674247000  |
| H  | 3.549589000  | 1.685033000  | -0.406738000 |
| H  | 3.515864000  | 0.183341000  | -2.372580000 |
| C  | 6.013131000  | 0.862122000  | -1.323174000 |
| H  | 5.771432000  | 1.595642000  | -0.542609000 |
| H  | 5.746021000  | 1.325554000  | -2.286287000 |
| C  | 7.488597000  | 0.583077000  | -1.289439000 |
| H  | 7.869305000  | -0.073793000 | -2.074774000 |
| C  | 8.339395000  | 1.069088000  | -0.381855000 |

|   |              |              |              |
|---|--------------|--------------|--------------|
| H | 7.951337000  | 1.728030000  | 0.398726000  |
| C | 9.810506000  | 0.796787000  | -0.341367000 |
| H | 10.386354000 | 1.727692000  | -0.426327000 |
| H | 10.102041000 | 0.334633000  | 0.611020000  |
| H | 10.121614000 | 0.130449000  | -1.152464000 |
| C | -8.543048000 | 0.569199000  | -1.423406000 |
| H | -9.210753000 | 1.415287000  | -1.229678000 |
| H | -8.796084000 | 0.166039000  | -2.411122000 |
| H | -8.765372000 | -0.206452000 | -0.680742000 |
| C | -7.078614000 | 0.996627000  | -1.358324000 |
| H | -6.895752000 | 1.796729000  | -2.089023000 |
| H | -6.864713000 | 1.429125000  | -0.370560000 |
| C | -6.110066000 | -0.157922000 | -1.624180000 |
| H | -6.321272000 | -0.589299000 | -2.613017000 |
| H | -6.291398000 | -0.960190000 | -0.893843000 |
| C | -4.640317000 | 0.270533000  | -1.560497000 |
| H | -4.423415000 | 0.698391000  | -0.572388000 |
| H | -4.457410000 | 1.064772000  | -2.296209000 |
| C | -3.700556000 | -0.899269000 | -1.830888000 |
| H | -3.878448000 | -1.326795000 | -2.823348000 |
| H | -3.821739000 | -1.692156000 | -1.087675000 |
| S | -1.946626000 | -0.349459000 | -1.832953000 |
| C | -0.916107000 | -1.851995000 | -1.949423000 |
| H | -0.334066000 | -1.826893000 | -2.875381000 |
| H | -1.551998000 | -2.743014000 | -1.941665000 |
| H | 1.910670000  | -1.563195000 | -1.623848000 |
| H | 3.055872000  | -2.081651000 | -0.348630000 |
| H | 3.431957000  | -2.314125000 | -2.058054000 |

86

**$K'$ ,  $E_{(\text{SCF Done})} = -1980.034321$  a.u.**

|   |              |              |             |
|---|--------------|--------------|-------------|
| C | -1.112968000 | 0.470652000  | 2.596239000 |
| C | -0.641681000 | -0.825009000 | 2.228849000 |
| C | 0.783299000  | -0.782448000 | 2.193040000 |
| C | 1.191643000  | 0.549310000  | 2.491235000 |
| C | 0.016615000  | 1.322677000  | 2.747569000 |
| C | -1.472928000 | -2.070583000 | 2.104103000 |
| H | -2.528577000 | -1.841064000 | 1.935622000 |
| H | -1.419282000 | -2.664854000 | 3.026382000 |
| H | -1.137862000 | -2.722755000 | 1.289034000 |
| C | 1.668865000  | -1.988056000 | 2.103202000 |
| H | 1.781500000  | -2.444289000 | 3.096492000 |
| H | 2.675121000  | -1.746053000 | 1.750946000 |
| H | 1.251065000  | -2.759017000 | 1.447932000 |
| C | 2.603499000  | 1.016434000  | 2.708028000 |

|    |              |              |              |
|----|--------------|--------------|--------------|
| H  | 2.749463000  | 2.064125000  | 2.423080000  |
| H  | 3.330497000  | 0.414497000  | 2.153371000  |
| H  | 2.874190000  | 0.939852000  | 3.769713000  |
| C  | -0.001012000 | 2.731582000  | 3.262456000  |
| H  | 0.098150000  | 2.738115000  | 4.356239000  |
| H  | -0.932138000 | 3.250392000  | 3.018969000  |
| H  | 0.826593000  | 3.331803000  | 2.868693000  |
| C  | -2.535071000 | 0.822750000  | 2.916551000  |
| H  | -2.795832000 | 0.465647000  | 3.921791000  |
| H  | -2.702607000 | 1.902822000  | 2.904837000  |
| H  | -3.248130000 | 0.369594000  | 2.219867000  |
| Sc | -0.055836000 | 0.653514000  | 0.365730000  |
| C  | -7.748220000 | -2.722481000 | 0.048014000  |
| H  | -8.504831000 | -2.605269000 | 0.830886000  |
| H  | -8.246205000 | -2.582556000 | -0.918707000 |
| H  | -7.385201000 | -3.756399000 | 0.088706000  |
| C  | -6.606305000 | -1.725635000 | 0.232170000  |
| H  | -7.006223000 | -0.702014000 | 0.221662000  |
| H  | -6.151403000 | -1.866489000 | 1.222955000  |
| C  | -5.525199000 | -1.854878000 | -0.843339000 |
| H  | -5.980559000 | -1.713756000 | -1.834102000 |
| H  | -5.122556000 | -2.878313000 | -0.834063000 |
| C  | -4.379867000 | -0.852371000 | -0.662004000 |
| H  | -3.910658000 | -0.995895000 | 0.318783000  |
| H  | -4.790533000 | 0.165037000  | -0.669109000 |
| C  | -3.327542000 | -1.005941000 | -1.752466000 |
| H  | -3.764219000 | -0.871680000 | -2.748608000 |
| H  | -2.890025000 | -2.010150000 | -1.728335000 |
| S  | -1.885306000 | 0.128943000  | -1.677628000 |
| C  | -2.619553000 | 1.797213000  | -1.924378000 |
| C  | -0.446780000 | 3.085125000  | -2.189585000 |
| H  | -0.049278000 | 2.129074000  | -2.565453000 |
| H  | -0.739981000 | 3.658186000  | -3.078845000 |
| C  | -1.687934000 | 2.844210000  | -1.311359000 |
| C  | -1.351579000 | 2.438642000  | 0.127912000  |
| H  | -3.587892000 | 1.811539000  | -1.416271000 |
| H  | -2.777843000 | 1.939643000  | -2.998714000 |
| C  | 0.685400000  | 3.825546000  | -1.453351000 |
| C  | 1.492888000  | 2.938290000  | -0.534986000 |
| C  | 2.484658000  | 2.113062000  | -0.935706000 |
| H  | 0.266419000  | 4.661884000  | -0.881633000 |
| H  | 1.358484000  | 4.272675000  | -2.194216000 |
| C  | 2.986091000  | 1.954736000  | -2.338374000 |
| H  | 4.066347000  | 2.145337000  | -2.365174000 |

|   |              |              |              |
|---|--------------|--------------|--------------|
| H | 2.830852000  | 0.937360000  | -2.714898000 |
| H | 2.503467000  | 2.642564000  | -3.036560000 |
| H | -2.267798000 | 3.783060000  | -1.312110000 |
| C | 7.766444000  | -2.237576000 | 0.112918000  |
| H | 8.640560000  | -1.624405000 | 0.355704000  |
| H | 7.583441000  | -2.906740000 | 0.962078000  |
| H | 8.027114000  | -2.860132000 | -0.751076000 |
| C | 6.546807000  | -1.366829000 | -0.180182000 |
| H | 6.333416000  | -0.729015000 | 0.689681000  |
| H | 6.773099000  | -0.685055000 | -1.011957000 |
| C | 5.301081000  | -2.185934000 | -0.524746000 |
| H | 5.073616000  | -2.870634000 | 0.305186000  |
| H | 5.514043000  | -2.821251000 | -1.396295000 |
| C | 4.074867000  | -1.315583000 | -0.821040000 |
| H | 4.303720000  | -0.632927000 | -1.648255000 |
| H | 3.853702000  | -0.691085000 | 0.054846000  |
| C | 2.862733000  | -2.166548000 | -1.176798000 |
| H | 2.630962000  | -2.874139000 | -0.375560000 |
| H | 3.066540000  | -2.742048000 | -2.087042000 |
| S | 1.350736000  | -1.188887000 | -1.555819000 |
| C | 0.299768000  | -2.552928000 | -2.137330000 |
| H | 0.020990000  | -3.227677000 | -1.323405000 |
| H | -0.591476000 | -2.116628000 | -2.590568000 |
| H | 0.840728000  | -3.109481000 | -2.907662000 |
| H | -0.953260000 | 3.304250000  | 0.674670000  |
| H | -2.292844000 | 2.184307000  | 0.640978000  |
| H | 3.044610000  | 1.580052000  | -0.165526000 |
| H | 1.336107000  | 3.050683000  | 0.540029000  |

86

**TS5',  $E_{(\text{SCF Done})} = -1980.018088$  a.u., IF =  $i316.0547$  cm<sup>-1</sup>**

|   |              |              |             |
|---|--------------|--------------|-------------|
| C | -1.147691000 | 1.276637000  | 2.385169000 |
| C | -0.350789000 | 0.104907000  | 2.533703000 |
| C | 1.019242000  | 0.489622000  | 2.429676000 |
| C | 1.067559000  | 1.895650000  | 2.213010000 |
| C | -0.270990000 | 2.384960000  | 2.194172000 |
| C | -0.875733000 | -1.245467000 | 2.927394000 |
| H | -1.783521000 | -1.524496000 | 2.380157000 |
| H | -1.137302000 | -1.257968000 | 3.994081000 |
| H | -0.136230000 | -2.035018000 | 2.772604000 |
| C | 2.213728000  | -0.374432000 | 2.705009000 |
| H | 2.624764000  | -0.150728000 | 3.698563000 |
| H | 3.023795000  | -0.220082000 | 1.983914000 |
| H | 1.956394000  | -1.436695000 | 2.700282000 |
| C | 2.308698000  | 2.738794000  | 2.235213000 |



|    |               |               |               |
|----|---------------|---------------|---------------|
| H  | 2. 245184000  | 3. 607037000  | 1. 569845000  |
| H  | 3. 199428000  | 2. 168022000  | 1. 953712000  |
| H  | 2. 488140000  | 3. 129783000  | 3. 245916000  |
| C  | -0. 663780000 | 3. 831740000  | 2. 222196000  |
| H  | -0. 583971000 | 4. 222866000  | 3. 245416000  |
| H  | -1. 698372000 | 3. 991388000  | 1. 903719000  |
| H  | -0. 017496000 | 4. 458219000  | 1. 597145000  |
| C  | -2. 636649000 | 1. 343945000  | 2. 573125000  |
| H  | -2. 886060000 | 1. 453443000  | 3. 637324000  |
| H  | -3. 084640000 | 2. 198143000  | 2. 054691000  |
| H  | -3. 142021000 | 0. 438055000  | 2. 221041000  |
| Sc | -0. 027127000 | 0. 879321000  | 0. 208010000  |
| C  | -6. 816321000 | -3. 719245000 | 0. 611002000  |
| H  | -7. 442924000 | -3. 696249000 | 1. 508673000  |
| H  | -7. 475291000 | -3. 601126000 | -0. 257191000 |
| H  | -6. 360050000 | -4. 714378000 | 0. 549354000  |
| C  | -5. 753887000 | -2. 623244000 | 0. 652709000  |
| H  | -6. 240921000 | -1. 642562000 | 0. 748496000  |
| H  | -5. 133688000 | -2. 746768000 | 1. 552134000  |
| C  | -4. 854013000 | -2. 619902000 | -0. 585035000 |
| H  | -5. 474034000 | -2. 499449000 | -1. 484831000 |
| H  | -4. 362941000 | -3. 599190000 | -0. 681570000 |
| C  | -3. 792060000 | -1. 515637000 | -0. 550542000 |
| H  | -3. 170288000 | -1. 626985000 | 0. 348792000  |
| H  | -4. 287584000 | -0. 539554000 | -0. 464961000 |
| C  | -2. 903513000 | -1. 543674000 | -1. 788036000 |
| H  | -3. 496485000 | -1. 461711000 | -2. 706245000 |
| H  | -2. 348275000 | -2. 484338000 | -1. 862558000 |
| S  | -1. 632353000 | -0. 224881000 | -1. 908235000 |
| C  | -2. 658342000 | 1. 223088000  | -2. 366294000 |
| C  | -0. 717786000 | 2. 703604000  | -3. 148691000 |
| H  | -0. 304319000 | 1. 731735000  | -3. 445173000 |
| H  | -1. 066702000 | 3. 190092000  | -4. 066358000 |
| C  | -1. 866269000 | 2. 508567000  | -2. 140447000 |
| C  | -1. 300924000 | 2. 577677000  | -0. 719894000 |
| H  | -3. 562781000 | 1. 214559000  | -1. 749493000 |
| H  | -2. 947930000 | 1. 106391000  | -3. 416210000 |
| C  | 0. 358182000  | 3. 534674000  | -2. 457966000 |
| C  | 0. 787339000  | 2. 925479000  | -1. 134155000 |
| C  | 1. 666908000  | 1. 818615000  | -1. 034624000 |
| H  | -0. 020400000 | 4. 549126000  | -2. 283631000 |
| H  | 1. 245333000  | 3. 633421000  | -3. 097259000 |
| C  | 2. 079635000  | 1. 031986000  | -2. 266909000 |
| H  | 2. 919612000  | 0. 374734000  | -2. 034642000 |

|   |               |               |               |
|---|---------------|---------------|---------------|
| H | 1. 289213000  | 0. 395882000  | -2. 685534000 |
| H | 2. 411376000  | 1. 698017000  | -3. 077052000 |
| H | -2. 583479000 | 3. 330835000  | -2. 280471000 |
| C | 7. 774596000  | -2. 427844000 | -0. 374816000 |
| H | 8. 637444000  | -1. 880697000 | -0. 768889000 |
| H | 7. 883414000  | -2. 479849000 | 0. 715114000  |
| H | 7. 825265000  | -3. 451925000 | -0. 763250000 |
| C | 6. 464719000  | -1. 749952000 | -0. 770064000 |
| H | 6. 459424000  | -0. 715206000 | -0. 398605000 |
| H | 6. 401129000  | -1. 682454000 | -1. 865094000 |
| C | 5. 231570000  | -2. 483570000 | -0. 238329000 |
| H | 5. 292467000  | -2. 551447000 | 0. 857583000  |
| H | 5. 235610000  | -3. 517950000 | -0. 610903000 |
| C | 3. 916147000  | -1. 806025000 | -0. 637382000 |
| H | 3. 852069000  | -1. 747146000 | -1. 731263000 |
| H | 3. 909857000  | -0. 775114000 | -0. 258795000 |
| C | 2. 712836000  | -2. 566536000 | -0. 097002000 |
| H | 2. 751930000  | -2. 638694000 | 0. 994193000  |
| H | 2. 699539000  | -3. 584142000 | -0. 504341000 |
| S | 1. 094886000  | -1. 836180000 | -0. 578939000 |
| C | 0. 029886000  | -3. 190564000 | 0. 004670000  |
| H | 0. 292731000  | -3. 482800000 | 1. 024368000  |
| H | -1. 007983000 | -2. 853412000 | -0. 001810000 |
| H | 0. 132436000  | -4. 052310000 | -0. 660745000 |
| H | -1. 372706000 | 3. 588633000  | -0. 317292000 |
| H | -1. 928266000 | 1. 966763000  | -0. 025515000 |
| H | 2. 437408000  | 1. 927141000  | -0. 270264000 |
| H | 0. 878038000  | 3. 644285000  | -0. 321787000 |

86

**M,  $E_{(\text{SCF Done})} = -1980.052402$  a.u.**

|   |               |               |              |
|---|---------------|---------------|--------------|
| C | 0. 552824000  | 0. 278488000  | 2. 575278000 |
| C | -0. 676348000 | -0. 440422000 | 2. 671179000 |
| C | -0. 374126000 | -1. 837452000 | 2. 660422000 |
| C | 1. 038086000  | -1. 979579000 | 2. 548585000 |
| C | 1. 610760000  | -0. 671261000 | 2. 492490000 |
| C | -2. 009550000 | 0. 178058000  | 2. 980996000 |
| H | -2. 178394000 | 1. 114006000  | 2. 436389000 |
| H | -2. 074369000 | 0. 421501000  | 4. 050228000 |
| H | -2. 841756000 | -0. 499929000 | 2. 766608000 |
| C | -1. 349327000 | -2. 958161000 | 2. 880317000 |
| H | -1. 398148000 | -3. 220549000 | 3. 945374000 |
| H | -1. 064536000 | -3. 866895000 | 2. 339838000 |
| H | -2. 365309000 | -2. 693986000 | 2. 569704000 |
| C | 1. 821441000  | -3. 254425000 | 2. 663890000 |

|    |               |               |               |
|----|---------------|---------------|---------------|
| H  | 2. 708620000  | -3. 258861000 | 2. 021438000  |
| H  | 1. 222382000  | -4. 133847000 | 2. 409010000  |
| H  | 2. 171066000  | -3. 394975000 | 3. 695774000  |
| C  | 3. 086941000  | -0. 397660000 | 2. 533441000  |
| H  | 3. 510068000  | -0. 742072000 | 3. 486070000  |
| H  | 3. 307834000  | 0. 670499000  | 2. 459902000  |
| H  | 3. 638214000  | -0. 914323000 | 1. 738590000  |
| C  | 0. 680653000  | 1. 770120000  | 2. 686919000  |
| H  | 0. 566430000  | 2. 088799000  | 3. 731887000  |
| H  | 1. 658222000  | 2. 127905000  | 2. 351361000  |
| H  | -0. 085602000 | 2. 299052000  | 2. 108751000  |
| Sc | 0. 277792000  | -0. 988462000 | 0. 442894000  |
| C  | 3. 188738000  | 6. 762611000  | 0. 197204000  |
| H  | 2. 625722000  | 7. 697472000  | 0. 107064000  |
| H  | 3. 475815000  | 6. 647702000  | 1. 249257000  |
| H  | 4. 109071000  | 6. 871593000  | -0. 388654000 |
| C  | 2. 362145000  | 5. 573059000  | -0. 285692000 |
| H  | 1. 431086000  | 5. 511211000  | 0. 295458000  |
| H  | 2. 061124000  | 5. 733854000  | -1. 330322000 |
| C  | 3. 113385000  | 4. 244188000  | -0. 177584000 |
| H  | 3. 418534000  | 4. 082756000  | 0. 866705000  |
| H  | 4. 042961000  | 4. 303727000  | -0. 761964000 |
| C  | 2. 284892000  | 3. 049657000  | -0. 660412000 |
| H  | 1. 974427000  | 3. 209242000  | -1. 701238000 |
| H  | 1. 364624000  | 2. 978311000  | -0. 065204000 |
| C  | 3. 069698000  | 1. 744822000  | -0. 567187000 |
| H  | 3. 433248000  | 1. 558601000  | 0. 446281000  |
| H  | 3. 938975000  | 1. 772031000  | -1. 233600000 |
| S  | 2. 071196000  | 0. 303682000  | -1. 120587000 |
| C  | 3. 331496000  | -0. 684355000 | -2. 037496000 |
| C  | 1. 461200000  | -1. 842122000 | -3. 414530000 |
| H  | 0. 870174000  | -1. 014452000 | -3. 002794000 |
| H  | 1. 601482000  | -1. 623964000 | -4. 478768000 |
| C  | 2. 805407000  | -1. 977425000 | -2. 659656000 |
| C  | 2. 628841000  | -3. 174253000 | -1. 680446000 |
| H  | 4. 159232000  | -0. 888992000 | -1. 350736000 |
| H  | 3. 689081000  | -0. 001838000 | -2. 816456000 |
| C  | 0. 743810000  | -3. 168429000 | -3. 163439000 |
| C  | 1. 138594000  | -3. 572104000 | -1. 732548000 |
| C  | 0. 371157000  | -2. 905681000 | -0. 579699000 |
| H  | 1. 125660000  | -3. 931164000 | -3. 854489000 |
| H  | -0. 336576000 | -3. 111605000 | -3. 335774000 |
| H  | 1. 039321000  | -4. 664209000 | -1. 637457000 |
| H  | 3. 584053000  | -2. 247158000 | -3. 385329000 |

|   |              |              |              |
|---|--------------|--------------|--------------|
| H | 2.945910000  | -2.928497000 | -0.659091000 |
| H | 3.259978000  | -4.006743000 | -2.012673000 |
| C | -8.242658000 | 1.245557000  | -0.670933000 |
| H | -8.989311000 | 2.020959000  | -0.871608000 |
| H | -8.432687000 | 0.414971000  | -1.361174000 |
| H | -8.412134000 | 0.877324000  | 0.347942000  |
| C | -6.825966000 | 1.790815000  | -0.835323000 |
| H | -6.698645000 | 2.184343000  | -1.853484000 |
| H | -6.677714000 | 2.642573000  | -0.157081000 |
| C | -5.749121000 | 0.737554000  | -0.564031000 |
| H | -5.894300000 | -0.114150000 | -1.244500000 |
| H | -5.875742000 | 0.342616000  | 0.454604000  |
| C | -4.327337000 | 1.286105000  | -0.725071000 |
| H | -4.172034000 | 2.129104000  | -0.039842000 |
| H | -4.205930000 | 1.679571000  | -1.742498000 |
| C | -3.280792000 | 0.211117000  | -0.448573000 |
| H | -3.387780000 | -0.643293000 | -1.126574000 |
| H | -3.375070000 | -0.162770000 | 0.575016000  |
| S | -1.551172000 | 0.818365000  | -0.579663000 |
| C | -1.378307000 | 0.984299000  | -2.383360000 |
| H | -0.347127000 | 1.278945000  | -2.586624000 |
| H | -1.597075000 | 0.039829000  | -2.888190000 |
| H | -2.052124000 | 1.766056000  | -2.740292000 |
| H | 0.635036000  | -3.496398000 | 0.312919000  |
| C | -1.155661000 | -2.901289000 | -0.672428000 |
| H | -1.514021000 | -2.559509000 | -1.650404000 |
| H | -1.632911000 | -3.868651000 | -0.457119000 |
| H | -1.638318000 | -2.221758000 | 0.077121000  |

86

**TS6,  $E_{(\text{SCF Done})} = -1980.014688$  a.u., IF =  $i1173.205$  cm<sup>-1</sup>**

|   |              |              |             |
|---|--------------|--------------|-------------|
| C | -0.243903000 | -0.288092000 | 2.321259000 |
| C | -0.226776000 | -1.690121000 | 2.056646000 |
| C | 1.125856000  | -2.138231000 | 2.126760000 |
| C | 1.945786000  | -1.016226000 | 2.435277000 |
| C | 1.101471000  | 0.129072000  | 2.548069000 |
| C | -1.429400000 | -2.581780000 | 1.952668000 |
| H | -2.305157000 | -2.053793000 | 1.565437000 |
| H | -1.701966000 | -2.964965000 | 2.945447000 |
| H | -1.249889000 | -3.458145000 | 1.320245000 |
| C | 1.580293000  | -3.567001000 | 2.056413000 |
| H | 1.523950000  | -4.033009000 | 3.049460000 |
| H | 2.617803000  | -3.657594000 | 1.720297000 |
| H | 0.959385000  | -4.172266000 | 1.387391000 |
| C | 3.403680000  | -1.063929000 | 2.786520000 |

|    |              |              |              |
|----|--------------|--------------|--------------|
| H  | 3.869029000  | -0.074876000 | 2.743828000  |
| H  | 3.978856000  | -1.730515000 | 2.133805000  |
| H  | 3.533263000  | -1.437437000 | 3.811084000  |
| C  | 1.552692000  | 1.480246000  | 3.025080000  |
| H  | 1.848154000  | 1.431574000  | 4.081224000  |
| H  | 0.754346000  | 2.223778000  | 2.957439000  |
| H  | 2.418531000  | 1.862781000  | 2.471946000  |
| C  | -1.477413000 | 0.550514000  | 2.488906000  |
| H  | -1.872045000 | 0.455284000  | 3.509530000  |
| H  | -1.283319000 | 1.613714000  | 2.320190000  |
| H  | -2.277913000 | 0.249748000  | 1.805638000  |
| Sc | 0.932011000  | -0.624848000 | 0.184241000  |
| C  | -4.237173000 | 5.743907000  | 0.642447000  |
| H  | -5.302898000 | 5.751002000  | 0.390769000  |
| H  | -4.153902000 | 5.704832000  | 1.735191000  |
| H  | -3.811639000 | 6.698282000  | 0.310539000  |
| C  | -3.524219000 | 4.562595000  | -0.011526000 |
| H  | -3.995408000 | 3.623330000  | 0.311676000  |
| H  | -3.654429000 | 4.611206000  | -1.101535000 |
| C  | -2.029755000 | 4.515186000  | 0.314425000  |
| H  | -1.897171000 | 4.466262000  | 1.405357000  |
| H  | -1.558076000 | 5.454299000  | -0.009078000 |
| C  | -1.313676000 | 3.332503000  | -0.345591000 |
| H  | -1.441008000 | 3.379794000  | -1.434381000 |
| H  | -1.775952000 | 2.392984000  | -0.017496000 |
| C  | 0.174778000  | 3.326200000  | -0.013648000 |
| H  | 0.353382000  | 3.275951000  | 1.063713000  |
| H  | 0.651286000  | 4.237721000  | -0.392084000 |
| S  | 1.058293000  | 1.944853000  | -0.842527000 |
| C  | 2.760750000  | 2.640812000  | -0.951714000 |
| C  | 3.396000000  | 0.916199000  | -2.772678000 |
| H  | 2.310465000  | 0.767398000  | -2.825583000 |
| H  | 3.671383000  | 1.505603000  | -3.653794000 |
| C  | 3.776758000  | 1.621528000  | -1.456544000 |
| C  | 4.090065000  | 0.488341000  | -0.446306000 |
| H  | 3.039740000  | 3.017901000  | 0.038357000  |
| H  | 2.683119000  | 3.491696000  | -1.637291000 |
| C  | 4.112583000  | -0.431811000 | -2.702122000 |
| C  | 4.058033000  | -0.856006000 | -1.218023000 |
| C  | 2.864443000  | -1.737939000 | -0.796288000 |
| H  | 5.161580000  | -0.303772000 | -2.998006000 |
| H  | 3.687457000  | -1.176241000 | -3.383306000 |
| H  | 4.967412000  | -1.431422000 | -0.989551000 |
| H  | 4.697512000  | 2.195140000  | -1.627755000 |

|   |              |              |              |
|---|--------------|--------------|--------------|
| H | 3.366266000  | 0.486309000  | 0.387240000  |
| H | 5.062769000  | 0.658351000  | 0.027834000  |
| C | -7.211236000 | -3.269344000 | -0.840483000 |
| H | -8.213346000 | -2.924964000 | -0.564440000 |
| H | -7.267741000 | -3.673677000 | -1.858063000 |
| H | -6.946678000 | -4.094581000 | -0.168562000 |
| C | -6.195104000 | -2.133143000 | -0.751253000 |
| H | -6.505487000 | -1.308853000 | -1.408225000 |
| H | -6.187372000 | -1.725332000 | 0.269488000  |
| C | -4.778954000 | -2.572578000 | -1.129983000 |
| H | -4.784770000 | -2.976716000 | -2.152391000 |
| H | -4.465976000 | -3.398049000 | -0.474244000 |
| C | -3.758734000 | -1.432671000 | -1.041029000 |
| H | -3.746215000 | -1.032282000 | -0.018053000 |
| H | -4.067395000 | -0.607905000 | -1.696413000 |
| C | -2.362080000 | -1.898731000 | -1.438460000 |
| H | -2.352088000 | -2.240512000 | -2.478817000 |
| H | -2.012246000 | -2.713900000 | -0.799242000 |
| S | -1.165577000 | -0.498780000 | -1.370005000 |
| C | 0.338680000  | -1.182688000 | -2.119436000 |
| H | 0.591132000  | -0.618574000 | -3.019712000 |
| H | 1.536688000  | -1.318619000 | -1.481464000 |
| H | 0.156620000  | -2.228473000 | -2.387209000 |
| H | 3.051822000  | -1.975782000 | 0.259771000  |
| C | 2.837243000  | -3.091619000 | -1.518485000 |
| H | 2.635625000  | -2.995442000 | -2.592987000 |
| H | 3.796804000  | -3.618502000 | -1.420843000 |
| H | 2.065894000  | -3.755247000 | -1.106324000 |

86

**N,  $E_{(\text{SCF Done})} = -1980.064567$  a.u.**

|   |              |              |             |
|---|--------------|--------------|-------------|
| C | -0.428808000 | -0.019845000 | 2.866261000 |
| C | -1.152936000 | -1.160681000 | 2.400474000 |
| C | -0.217249000 | -2.221458000 | 2.194319000 |
| C | 1.082052000  | -1.729572000 | 2.507843000 |
| C | 0.951814000  | -0.370214000 | 2.933149000 |
| C | -2.649821000 | -1.268984000 | 2.328935000 |
| H | -3.122095000 | -0.335639000 | 2.004912000 |
| H | -3.063612000 | -1.510418000 | 3.317104000 |
| H | -2.975284000 | -2.060155000 | 1.647551000 |
| C | -0.548105000 | -3.644266000 | 1.854713000 |
| H | -0.726389000 | -4.222339000 | 2.771251000 |
| H | 0.265834000  | -4.138825000 | 1.316037000 |
| H | -1.453427000 | -3.730991000 | 1.246006000 |
| C | 2.348045000  | -2.537300000 | 2.500394000 |

|    |               |               |               |
|----|---------------|---------------|---------------|
| H  | 3. 238680000  | -1. 909178000 | 2. 401409000  |
| H  | 2. 365869000  | -3. 269210000 | 1. 686548000  |
| H  | 2. 454367000  | -3. 095096000 | 3. 440340000  |
| C  | 2. 056530000  | 0. 488161000  | 3. 480669000  |
| H  | 2. 201964000  | 0. 289213000  | 4. 550774000  |
| H  | 1. 836782000  | 1. 556772000  | 3. 386485000  |
| H  | 3. 018225000  | 0. 296295000  | 2. 992805000  |
| C  | -1. 039598000 | 1. 275991000  | 3. 318466000  |
| H  | -1. 340483000 | 1. 211924000  | 4. 372743000  |
| H  | -0. 340745000 | 2. 115372000  | 3. 241310000  |
| H  | -1. 939600000 | 1. 533758000  | 2. 750079000  |
| Sc | 0. 307699000  | -0. 453477000 | 0. 586856000  |
| C  | -4. 452653000 | 5. 341741000  | -0. 201629000 |
| H  | -5. 496379000 | 5. 178492000  | -0. 489567000 |
| H  | -4. 436704000 | 5. 585896000  | 0. 867238000  |
| H  | -4. 091039000 | 6. 220004000  | -0. 749092000 |
| C  | -3. 599512000 | 4. 111849000  | -0. 503497000 |
| H  | -4. 008378000 | 3. 241021000  | 0. 029219000  |
| H  | -3. 662210000 | 3. 873698000  | -1. 574381000 |
| C  | -2. 131303000 | 4. 298071000  | -0. 114518000 |
| H  | -2. 064534000 | 4. 532593000  | 0. 957720000  |
| H  | -1. 722669000 | 5. 169039000  | -0. 646199000 |
| C  | -1. 270841000 | 3. 069299000  | -0. 426413000 |
| H  | -1. 324524000 | 2. 841645000  | -1. 498677000 |
| H  | -1. 681646000 | 2. 194549000  | 0. 099805000  |
| C  | 0. 183443000  | 3. 285580000  | -0. 021122000 |
| H  | 0. 279136000  | 3. 452613000  | 1. 056668000  |
| H  | 0. 603130000  | 4. 152738000  | -0. 542623000 |
| S  | 1. 231915000  | 1. 854801000  | -0. 498077000 |
| C  | 2. 886137000  | 2. 388359000  | 0. 119229000  |
| C  | 4. 218565000  | 1. 833078000  | -2. 047286000 |
| H  | 3. 261921000  | 2. 076935000  | -2. 523883000 |
| H  | 4. 889860000  | 2. 675799000  | -2. 242050000 |
| C  | 4. 038039000  | 1. 620877000  | -0. 523888000 |
| C  | 4. 032995000  | 0. 097811000  | -0. 345234000 |
| H  | 2. 899779000  | 2. 293171000  | 1. 209093000  |
| H  | 2. 952798000  | 3. 453254000  | -0. 131458000 |
| C  | 4. 777662000  | 0. 497417000  | -2. 595753000 |
| C  | 5. 073971000  | -0. 385208000 | -1. 365251000 |
| C  | 5. 058825000  | -1. 890697000 | -1. 627453000 |
| H  | 5. 661881000  | 0. 643672000  | -3. 222742000 |
| H  | 4. 024612000  | 0. 001901000  | -3. 223078000 |
| H  | 6. 066125000  | -0. 113522000 | -0. 971435000 |
| H  | 4. 936274000  | 2. 000699000  | -0. 014987000 |

|   |              |              |              |
|---|--------------|--------------|--------------|
| H | 3.050144000  | -0.325918000 | -0.625137000 |
| H | 4.256323000  | -0.217750000 | 0.681219000  |
| C | -7.496323000 | -2.610094000 | -1.942125000 |
| H | -8.445250000 | -2.078594000 | -2.069641000 |
| H | -7.395628000 | -3.314366000 | -2.776403000 |
| H | -7.565572000 | -3.196788000 | -1.018215000 |
| C | -6.321248000 | -1.636223000 | -1.894572000 |
| H | -6.299161000 | -1.040477000 | -2.817675000 |
| H | -6.468191000 | -0.921614000 | -1.072249000 |
| C | -4.973502000 | -2.339079000 | -1.717623000 |
| H | -4.824358000 | -3.051865000 | -2.541150000 |
| H | -4.993319000 | -2.936304000 | -0.794123000 |
| C | -3.793690000 | -1.362506000 | -1.671385000 |
| H | -3.935586000 | -0.651144000 | -0.846568000 |
| H | -3.769273000 | -0.772606000 | -2.597109000 |
| C | -2.465807000 | -2.091264000 | -1.497613000 |
| H | -2.287423000 | -2.788427000 | -2.323177000 |
| H | -2.435683000 | -2.653196000 | -0.559979000 |
| S | -1.057150000 | -0.910751000 | -1.528223000 |
| C | 0.439268000  | -1.860905000 | -1.084010000 |
| H | 1.156407000  | -1.817532000 | -1.908868000 |
| H | 4.069323000  | -2.173606000 | -2.018061000 |
| H | 0.174422000  | -2.903805000 | -0.883573000 |
| H | 5.175935000  | -2.421483000 | -0.671992000 |
| C | 6.143073000  | -2.358795000 | -2.597111000 |
| H | 6.024323000  | -1.903598000 | -3.586719000 |
| H | 7.142764000  | -2.099714000 | -2.228377000 |
| H | 6.110225000  | -3.445555000 | -2.728094000 |

40

**3b,  $E_{(\text{SCF Done})} = -908.963841$  a.u.**

|   |             |              |              |
|---|-------------|--------------|--------------|
| C | 7.217668000 | -0.464381000 | 0.127097000  |
| H | 7.951076000 | -1.229864000 | 0.405109000  |
| H | 7.414494000 | -0.177511000 | -0.913308000 |
| H | 7.403376000 | 0.417080000  | 0.753215000  |
| C | 5.787956000 | -0.973004000 | 0.299020000  |
| H | 5.642631000 | -1.874816000 | -0.312453000 |
| H | 5.631638000 | -1.284753000 | 1.341455000  |
| C | 4.731477000 | 0.066750000  | -0.078940000 |
| H | 4.886805000 | 0.378573000  | -1.122552000 |
| H | 4.875877000 | 0.969300000  | 0.533472000  |
| C | 3.298074000 | -0.441344000 | 0.092747000  |
| H | 3.138545000 | -0.748451000 | 1.135304000  |
| H | 3.149296000 | -1.339077000 | -0.522437000 |
| C | 2.257702000 | 0.609233000  | -0.288297000 |



|   |              |              |              |
|---|--------------|--------------|--------------|
| H | 2.387543000  | 0.907930000  | -1.336474000 |
| H | 2.378189000  | 1.506209000  | 0.333007000  |
| S | 0.572163000  | -0.051711000 | -0.060018000 |
| C | -0.388708000 | 1.410906000  | -0.601517000 |
| C | -2.296809000 | 1.194126000  | 1.155404000  |
| H | -1.471090000 | 0.797998000  | 1.756498000  |
| H | -2.525693000 | 2.191197000  | 1.548822000  |
| C | -1.889439000 | 1.274276000  | -0.338561000 |
| C | -2.586024000 | 0.070513000  | -0.988972000 |
| H | -0.210314000 | 1.568427000  | -1.672768000 |
| H | -0.001464000 | 2.288290000  | -0.067045000 |
| C | -3.522483000 | 0.250433000  | 1.213745000  |
| C | -3.927802000 | -0.011991000 | -0.251484000 |
| C | -4.698983000 | -1.310677000 | -0.485342000 |
| H | -4.343482000 | 0.664091000  | 1.809154000  |
| H | -3.240949000 | -0.702867000 | 1.681880000  |
| H | -4.553807000 | 0.828491000  | -0.594447000 |
| H | -2.344172000 | 2.181045000  | -0.766040000 |
| H | -2.009824000 | -0.848358000 | -0.807332000 |
| H | -2.693425000 | 0.177598000  | -2.075447000 |
| H | -4.080639000 | -2.155044000 | -0.145987000 |
| H | -4.841258000 | -1.452471000 | -1.566149000 |
| C | -6.058627000 | -1.360747000 | 0.210593000  |
| H | -5.956364000 | -1.290147000 | 1.299718000  |
| H | -6.701331000 | -0.533483000 | -0.116117000 |
| H | -6.584272000 | -2.296557000 | -0.011759000 |

57

**O,  $E_{(\text{SCF Done})} = -1129.198134$  a.u.**

|   |              |              |              |
|---|--------------|--------------|--------------|
| C | 2.341228000  | -1.084489000 | 1.043032000  |
| C | 1.263460000  | -1.928242000 | 1.446259000  |
| C | 0.810780000  | -2.645559000 | 0.296135000  |
| C | 1.602992000  | -2.235904000 | -0.816432000 |
| C | 2.549490000  | -1.269216000 | -0.356363000 |
| C | 0.753306000  | -2.116343000 | 2.847607000  |
| H | 1.237583000  | -2.979886000 | 3.321978000  |
| H | -0.326215000 | -2.304990000 | 2.880707000  |
| H | 0.962131000  | -1.249693000 | 3.482498000  |
| C | -0.236103000 | -3.722240000 | 0.291085000  |
| H | 0.216280000  | -4.699658000 | 0.505082000  |
| H | -0.736126000 | -3.810861000 | -0.679112000 |
| H | -1.004623000 | -3.558144000 | 1.054357000  |
| C | 1.543173000  | -2.808783000 | -2.204143000 |
| H | 1.819316000  | -2.075233000 | -2.969948000 |
| H | 0.551293000  | -3.201962000 | -2.450676000 |

|    |              |              |              |
|----|--------------|--------------|--------------|
| H  | 2.247803000  | -3.644779000 | -2.304639000 |
| C  | 3.661543000  | -0.666552000 | -1.162082000 |
| H  | 4.565404000  | -1.286189000 | -1.089530000 |
| H  | 3.919636000  | 0.336988000  | -0.813054000 |
| H  | 3.407759000  | -0.592094000 | -2.224134000 |
| C  | 3.169245000  | -0.200061000 | 1.928837000  |
| H  | 4.122224000  | -0.686517000 | 2.174564000  |
| H  | 3.407583000  | 0.754091000  | 1.447196000  |
| H  | 2.669170000  | 0.018348000  | 2.877239000  |
| Sc | 0.350088000  | -0.285933000 | -0.089008000 |
| C  | 0.571845000  | 2.280325000  | 0.436073000  |
| C  | 1.082811000  | 1.657087000  | -0.708051000 |
| C  | 0.673429000  | 3.631700000  | 0.734941000  |
| C  | 1.741753000  | 2.503113000  | -1.609736000 |
| C  | 1.336909000  | 4.430484000  | -0.201765000 |
| H  | 0.268679000  | 4.069728000  | 1.642034000  |
| C  | 1.864935000  | 3.874207000  | -1.367155000 |
| H  | 2.174553000  | 2.091898000  | -2.520264000 |
| H  | 1.439786000  | 5.494933000  | -0.010272000 |
| H  | 2.377897000  | 4.511496000  | -2.082420000 |
| C  | -0.480598000 | 1.740857000  | 2.607459000  |
| H  | -0.870160000 | 0.850746000  | 3.101660000  |
| H  | 0.384045000  | 2.128208000  | 3.154334000  |
| H  | -1.264231000 | 2.501447000  | 2.548265000  |
| O  | -0.089574000 | 1.341065000  | 1.292846000  |
| H  | -2.450458000 | 1.894735000  | -1.053684000 |
| C  | -2.647354000 | -0.224484000 | -0.713307000 |
| C  | -3.057485000 | 1.103086000  | -0.622554000 |
| C  | -3.389879000 | -1.270917000 | -0.175768000 |
| C  | -4.254725000 | 1.384387000  | 0.034716000  |
| C  | -4.582643000 | -0.971161000 | 0.483750000  |
| H  | -3.044839000 | -2.295073000 | -0.282806000 |
| C  | -5.013955000 | 0.351335000  | 0.586918000  |
| H  | -4.594649000 | 2.413142000  | 0.111296000  |
| H  | -5.177585000 | -1.775022000 | 0.907258000  |
| H  | -5.946980000 | 0.577712000  | 1.094454000  |
| C  | -1.489073000 | -0.538386000 | -2.802194000 |
| H  | -0.493566000 | -0.801192000 | -3.161066000 |
| H  | -2.217877000 | -1.288532000 | -3.118233000 |
| H  | -1.772241000 | 0.452442000  | -3.164359000 |
| O  | -1.424670000 | -0.526935000 | -1.354488000 |

16

**1c,  $E_{(\text{SCF Done})} = -346.614132$  a.u.**

|   |              |             |             |
|---|--------------|-------------|-------------|
| C | -2.278527000 | 0.331566000 | 0.000046000 |
|---|--------------|-------------|-------------|

|   |              |              |              |
|---|--------------|--------------|--------------|
| C | -1.330982000 | 1.350048000  | 0.000011000  |
| C | 0.035782000  | 1.060870000  | -0.000092000 |
| C | 0.456969000  | -0.272573000 | -0.000072000 |
| C | -0.493583000 | -1.302389000 | 0.000002000  |
| C | -1.848362000 | -0.998210000 | 0.000036000  |
| H | -3.339036000 | 0.567174000  | 0.000092000  |
| H | -1.649447000 | 2.389770000  | -0.000001000 |
| H | 0.753877000  | 1.874019000  | -0.000172000 |
| H | -0.142994000 | -2.330304000 | 0.000009000  |
| H | -2.575432000 | -1.806591000 | 0.000072000  |
| O | 1.757774000  | -0.671826000 | -0.000106000 |
| C | 2.756536000  | 0.325138000  | 0.000121000  |
| H | 2.696245000  | 0.959310000  | 0.895229000  |
| H | 3.711121000  | -0.204949000 | 0.000195000  |
| H | 2.696471000  | 0.959475000  | -0.894888000 |

65

**P,  $E_{(\text{SCF Done})} = -1096.869823$  a.u.**

|    |              |              |              |
|----|--------------|--------------|--------------|
| C  | -3.297973000 | -0.687965000 | 0.991478000  |
| C  | -3.430333000 | -1.425827000 | -0.224114000 |
| C  | -2.412466000 | -2.428315000 | -0.246582000 |
| C  | -1.643132000 | -2.298904000 | 0.948729000  |
| C  | -2.189495000 | -1.222206000 | 1.714578000  |
| C  | -4.516912000 | -1.265171000 | -1.250029000 |
| H  | -5.354661000 | -1.940208000 | -1.031405000 |
| H  | -4.175520000 | -1.508549000 | -2.262756000 |
| H  | -4.925585000 | -0.249937000 | -1.265802000 |
| C  | -2.271316000 | -3.498695000 | -1.291275000 |
| H  | -2.983551000 | -4.312348000 | -1.101618000 |
| H  | -1.273831000 | -3.948450000 | -1.295373000 |
| H  | -2.477489000 | -3.131310000 | -2.303131000 |
| C  | -0.524262000 | -3.198486000 | 1.391782000  |
| H  | -0.038591000 | -3.705728000 | 0.552116000  |
| H  | -0.905338000 | -3.983357000 | 2.058118000  |
| H  | 0.247730000  | -2.658734000 | 1.951304000  |
| C  | -1.756589000 | -0.809073000 | 3.090435000  |
| H  | -2.308339000 | -1.376330000 | 3.851837000  |
| H  | -1.942547000 | 0.252879000  | 3.274026000  |
| H  | -0.691655000 | -0.995941000 | 3.262007000  |
| C  | -4.201287000 | 0.410298000  | 1.471248000  |
| H  | -4.960077000 | 0.008352000  | 2.155445000  |
| H  | -3.651449000 | 1.185869000  | 2.013275000  |
| H  | -4.737678000 | 0.893474000  | 0.648875000  |
| Sc | -1.320413000 | -0.244242000 | -0.308043000 |
| C  | -1.260876000 | 2.366490000  | -0.478775000 |

|   |              |              |              |
|---|--------------|--------------|--------------|
| C | -0.720844000 | 1.626929000  | 0.581438000  |
| C | -1.258164000 | 3.750044000  | -0.584485000 |
| C | -0.134089000 | 2.385802000  | 1.605086000  |
| C | -0.655010000 | 4.454332000  | 0.461750000  |
| H | -1.693631000 | 4.281723000  | -1.424664000 |
| C | -0.094857000 | 3.780424000  | 1.548670000  |
| H | 0.299539000  | 1.883141000  | 2.467970000  |
| H | -0.627996000 | 5.539598000  | 0.420904000  |
| H | 0.366958000  | 4.347712000  | 2.352153000  |
| C | -2.677375000 | 2.087880000  | -2.488655000 |
| H | -3.103492000 | 1.256902000  | -3.051179000 |
| H | -3.473862000 | 2.675013000  | -2.022691000 |
| H | -2.081189000 | 2.717631000  | -3.154806000 |
| O | -1.838221000 | 1.513737000  | -1.480834000 |
| C | 8.802715000  | -0.235210000 | 0.074775000  |
| H | 9.013263000  | -0.959745000 | -0.721078000 |
| H | 9.563515000  | -0.365493000 | 0.851830000  |
| H | 8.928785000  | 0.768553000  | -0.348634000 |
| C | 7.396768000  | -0.425661000 | 0.639422000  |
| H | 7.313008000  | -1.425848000 | 1.087635000  |
| H | 7.228919000  | 0.289678000  | 1.457015000  |
| C | 6.301414000  | -0.252484000 | -0.414671000 |
| H | 6.468007000  | -0.968762000 | -1.232575000 |
| H | 6.384410000  | 0.748139000  | -0.863838000 |
| C | 4.890648000  | -0.441422000 | 0.145546000  |
| H | 4.721255000  | 0.276852000  | 0.961023000  |
| H | 4.807166000  | -1.442119000 | 0.593942000  |
| C | 3.801512000  | -0.268357000 | -0.914761000 |
| H | 3.958628000  | -0.985697000 | -1.731050000 |
| H | 3.875858000  | 0.733820000  | -1.359012000 |
| C | 2.384425000  | -0.464950000 | -0.334567000 |
| H | 2.233510000  | 0.267082000  | 0.470924000  |
| H | 2.296547000  | -1.468116000 | 0.101218000  |
| C | 1.344796000  | -0.258475000 | -1.385608000 |
| C | 0.516870000  | -1.208794000 | -1.875226000 |
| H | 0.578421000  | -2.242096000 | -1.536196000 |
| H | -0.110562000 | -1.015053000 | -2.748102000 |
| H | 1.300978000  | 0.743365000  | -1.819255000 |

65

**TS7,  $E_{(\text{SCF Done})} = -1096.850099$  a.u., IF =  $i264.2062$  cm<sup>-1</sup>**

|   |              |              |              |
|---|--------------|--------------|--------------|
| C | -3.640810000 | 0.114177000  | 0.668692000  |
| C | -3.755975000 | -0.742819000 | -0.468072000 |
| C | -3.064917000 | -1.960450000 | -0.179932000 |
| C | -2.515436000 | -1.849662000 | 1.133309000  |

|    |              |              |              |
|----|--------------|--------------|--------------|
| C  | -2.869765000 | -0.569541000 | 1.658776000  |
| C  | -4.561302000 | -0.480022000 | -1.709032000 |
| H  | -5.549042000 | -0.953365000 | -1.633776000 |
| H  | -4.086076000 | -0.886944000 | -2.608861000 |
| H  | -4.736337000 | 0.587949000  | -1.872911000 |
| C  | -3.063478000 | -3.187881000 | -1.042749000 |
| H  | -3.978322000 | -3.772411000 | -0.878568000 |
| H  | -2.219817000 | -3.847848000 | -0.819570000 |
| H  | -3.024335000 | -2.947273000 | -2.110336000 |
| C  | -1.759599000 | -2.923846000 | 1.863243000  |
| H  | -1.170115000 | -3.550523000 | 1.185592000  |
| H  | -2.452785000 | -3.591350000 | 2.391751000  |
| H  | -1.079335000 | -2.514550000 | 2.617694000  |
| C  | -2.572440000 | -0.061379000 | 3.042349000  |
| H  | -3.389210000 | -0.319112000 | 3.729450000  |
| H  | -2.464084000 | 1.028147000  | 3.071690000  |
| H  | -1.658559000 | -0.497237000 | 3.458741000  |
| C  | -4.301156000 | 1.451412000  | 0.853122000  |
| H  | -5.236808000 | 1.343025000  | 1.417055000  |
| H  | -3.675395000 | 2.154615000  | 1.414547000  |
| H  | -4.561578000 | 1.919567000  | -0.101249000 |
| Sc | -1.393802000 | -0.176447000 | -0.196584000 |
| C  | -0.230098000 | 2.095463000  | -0.480808000 |
| C  | 0.462283000  | 1.005539000  | 0.083469000  |
| C  | -0.038977000 | 3.421047000  | -0.105623000 |
| C  | 1.371907000  | 1.312251000  | 1.105889000  |
| C  | 0.893046000  | 3.674046000  | 0.902769000  |
| H  | -0.579897000 | 4.239498000  | -0.569663000 |
| C  | 1.581073000  | 2.627973000  | 1.520119000  |
| H  | 1.938564000  | 0.516263000  | 1.583801000  |
| H  | 1.073259000  | 4.699937000  | 1.210763000  |
| H  | 2.289655000  | 2.841302000  | 2.315179000  |
| C  | -1.978061000 | 2.659404000  | -2.109317000 |
| H  | -2.629864000 | 2.101891000  | -2.780863000 |
| H  | -2.572583000 | 3.250841000  | -1.407340000 |
| H  | -1.312598000 | 3.304530000  | -2.688746000 |
| O  | -1.198361000 | 1.677553000  | -1.410569000 |
| C  | 8.493443000  | -0.355196000 | 0.142898000  |
| H  | 8.742725000  | -0.367267000 | -0.924994000 |
| H  | 9.317608000  | -0.835488000 | 0.681169000  |
| H  | 8.454537000  | 0.693419000  | 0.462220000  |
| C  | 7.168368000  | -1.065586000 | 0.409903000  |
| H  | 7.250784000  | -2.120455000 | 0.112365000  |
| H  | 6.964616000  | -1.069698000 | 1.490277000  |

|   |              |              |              |
|---|--------------|--------------|--------------|
| C | 5.987873000  | -0.426760000 | -0.323796000 |
| H | 6.191608000  | -0.423052000 | -1.404688000 |
| H | 5.904177000  | 0.629589000  | -0.027144000 |
| C | 4.657267000  | -1.134489000 | -0.063384000 |
| H | 4.455345000  | -1.143506000 | 1.018760000  |
| H | 4.741432000  | -2.189067000 | -0.364040000 |
| C | 3.477995000  | -0.491578000 | -0.794947000 |
| H | 3.685245000  | -0.475344000 | -1.874432000 |
| H | 3.380571000  | 0.558006000  | -0.486204000 |
| C | 2.159231000  | -1.232247000 | -0.561354000 |
| H | 1.962061000  | -1.341885000 | 0.513720000  |
| H | 2.259128000  | -2.259596000 | -0.937102000 |
| C | 0.966421000  | -0.621994000 | -1.276704000 |
| C | -0.160443000 | -1.419083000 | -1.596433000 |
| H | -0.154920000 | -2.464292000 | -1.288430000 |
| H | -0.672176000 | -1.224672000 | -2.543066000 |
| H | 1.210562000  | 0.178648000  | -1.974310000 |

73

**O',  $E_{(\text{SCF Done})} = -1475.842473$  a.u.**

|   |              |              |             |
|---|--------------|--------------|-------------|
| C | -1.083334000 | 0.739960000  | 2.255932000 |
| C | -1.392171000 | -0.648925000 | 2.327621000 |
| C | -0.163401000 | -1.375466000 | 2.301470000 |
| C | 0.903642000  | -0.435646000 | 2.214621000 |
| C | 0.335230000  | 0.873185000  | 2.191130000 |
| C | -2.762525000 | -1.220459000 | 2.536673000 |
| H | -3.024026000 | -1.204092000 | 3.603269000 |
| H | -2.830852000 | -2.261309000 | 2.206769000 |
| H | -3.527804000 | -0.652102000 | 2.000567000 |
| C | -0.005226000 | -2.855480000 | 2.497808000 |
| H | 0.222240000  | -3.079728000 | 3.548541000 |
| H | 0.815021000  | -3.272959000 | 1.903193000 |
| H | -0.918839000 | -3.402825000 | 2.249739000 |
| C | 2.367166000  | -0.737454000 | 2.356273000 |
| H | 2.993782000  | -0.086904000 | 1.737447000 |
| H | 2.603932000  | -1.771110000 | 2.092035000 |
| H | 2.682774000  | -0.588831000 | 3.398157000 |
| C | 1.116258000  | 2.141520000  | 2.372605000 |
| H | 1.311881000  | 2.299152000  | 3.442354000 |
| H | 0.583098000  | 3.023062000  | 2.008987000 |
| H | 2.088097000  | 2.109634000  | 1.871919000 |
| C | -2.074678000 | 1.857928000  | 2.379165000 |
| H | -2.306778000 | 2.050934000  | 3.435339000 |
| H | -1.689495000 | 2.792139000  | 1.959631000 |
| H | -3.016589000 | 1.623652000  | 1.873955000 |

|    |              |              |              |
|----|--------------|--------------|--------------|
| Sc | -0.404269000 | -0.280861000 | 0.117634000  |
| C  | -2.776777000 | -1.291086000 | -0.901767000 |
| C  | -2.440551000 | 0.045085000  | -0.673035000 |
| C  | -3.981597000 | -1.744665000 | -1.423964000 |
| C  | -3.431086000 | 0.975562000  | -1.012149000 |
| C  | -4.933461000 | -0.772160000 | -1.749243000 |
| H  | -4.201284000 | -2.797121000 | -1.576523000 |
| C  | -4.662937000 | 0.579971000  | -1.546396000 |
| H  | -3.259121000 | 2.039881000  | -0.852211000 |
| H  | -5.890385000 | -1.082428000 | -2.159809000 |
| H  | -5.414017000 | 1.323908000  | -1.799245000 |
| C  | -1.908866000 | -3.545051000 | -0.548647000 |
| H  | -0.989028000 | -3.997897000 | -0.178473000 |
| H  | -2.745540000 | -3.826382000 | 0.099712000  |
| H  | -2.106291000 | -3.891973000 | -1.569556000 |
| O  | -1.711624000 | -2.137831000 | -0.527768000 |
| H  | 2.769798000  | 2.413720000  | -1.030607000 |
| C  | 0.661356000  | 2.794273000  | -0.843678000 |
| C  | 2.003796000  | 3.151232000  | -0.812625000 |
| C  | -0.346407000 | 3.715426000  | -0.577024000 |
| C  | 2.345023000  | 4.463598000  | -0.484342000 |
| C  | 0.006633000  | 5.024682000  | -0.251894000 |
| H  | -1.386992000 | 3.408911000  | -0.621162000 |
| C  | 1.349987000  | 5.398972000  | -0.203935000 |
| H  | 3.391445000  | 4.753005000  | -0.451099000 |
| H  | -0.771146000 | 5.752177000  | -0.037934000 |
| H  | 1.620202000  | 6.420070000  | 0.048314000  |
| C  | -0.058826000 | 1.391067000  | -2.587558000 |
| H  | -0.410568000 | 0.378589000  | -2.780285000 |
| H  | -0.869526000 | 2.092068000  | -2.797178000 |
| H  | 0.814382000  | 1.621256000  | -3.205308000 |
| O  | 0.312283000  | 1.472470000  | -1.191507000 |
| H  | 2.078454000  | -3.731030000 | -0.269746000 |
| C  | 2.390965000  | -1.735978000 | -1.017526000 |
| C  | 2.806767000  | -2.957670000 | -0.496843000 |
| C  | 3.298195000  | -0.733451000 | -1.339412000 |
| C  | 4.167123000  | -3.167189000 | -0.274723000 |
| C  | 4.656839000  | -0.952759000 | -1.108436000 |
| H  | 2.942058000  | 0.196195000  | -1.771327000 |
| C  | 5.090968000  | -2.165936000 | -0.575949000 |
| H  | 4.503891000  | -4.115656000 | 0.133668000  |
| H  | 5.376026000  | -0.176746000 | -1.354689000 |
| H  | 6.149474000  | -2.334543000 | -0.401881000 |
| C  | 0.599771000  | -2.119597000 | -2.504566000 |

|   |              |              |              |
|---|--------------|--------------|--------------|
| H | -0.467436000 | -1.930727000 | -2.615649000 |
| H | 1.161828000  | -1.671594000 | -3.329113000 |
| H | 0.784301000  | -3.196788000 | -2.475706000 |
| O | 1.018769000  | -1.520698000 | -1.256213000 |

81

**P', E<sub>(SCF Done)</sub> = -1443.515897 a.u.**

|    |              |              |              |
|----|--------------|--------------|--------------|
| C  | 3.151228000  | -0.926325000 | 1.105353000  |
| C  | 2.424952000  | -2.155135000 | 1.077567000  |
| C  | 1.358372000  | -2.062020000 | 2.017273000  |
| C  | 1.424299000  | -0.775649000 | 2.627615000  |
| C  | 2.531577000  | -0.070614000 | 2.064705000  |
| C  | 2.779547000  | -3.388949000 | 0.301533000  |
| H  | 3.496626000  | -3.178951000 | -0.497259000 |
| H  | 1.899090000  | -3.862418000 | -0.145985000 |
| H  | 3.246392000  | -4.132604000 | 0.960612000  |
| C  | 0.450480000  | -3.181373000 | 2.428161000  |
| H  | -0.510717000 | -2.815319000 | 2.802538000  |
| H  | 0.909905000  | -3.765569000 | 3.237398000  |
| H  | 0.243653000  | -3.865208000 | 1.600988000  |
| C  | 0.606031000  | -0.344343000 | 3.811829000  |
| H  | 0.963682000  | -0.850028000 | 4.718383000  |
| H  | -0.455887000 | -0.595883000 | 3.712527000  |
| H  | 0.682059000  | 0.730351000  | 4.004567000  |
| C  | 3.058883000  | 1.256392000  | 2.529438000  |
| H  | 2.263645000  | 1.930947000  | 2.865205000  |
| H  | 3.622364000  | 1.775377000  | 1.749123000  |
| H  | 3.737548000  | 1.119191000  | 3.382089000  |
| C  | 4.431624000  | -0.639913000 | 0.374469000  |
| H  | 4.554754000  | 0.423793000  | 0.149526000  |
| H  | 5.294328000  | -0.941500000 | 0.983503000  |
| H  | 4.504508000  | -1.193153000 | -0.567637000 |
| Sc | 0.926560000  | -0.424630000 | 0.231899000  |
| C  | 0.083975000  | -2.145743000 | -1.707686000 |
| C  | -0.569717000 | -1.866748000 | -0.505057000 |
| C  | -0.334144000 | -3.062132000 | -2.664759000 |
| C  | -1.741460000 | -2.602180000 | -0.281327000 |
| C  | -1.514786000 | -3.760562000 | -2.393837000 |
| H  | 0.211936000  | -3.245308000 | -3.585199000 |
| C  | -2.215550000 | -3.534626000 | -1.209514000 |
| H  | -2.305721000 | -2.460522000 | 0.640223000  |
| H  | -1.880293000 | -4.485691000 | -3.115634000 |
| H  | -3.128248000 | -4.089743000 | -1.009186000 |
| C  | 2.179784000  | -1.663584000 | -2.874236000 |
| H  | 3.053447000  | -1.031775000 | -2.712670000 |



|   |               |              |              |
|---|---------------|--------------|--------------|
| H | 2.473451000   | -2.717154000 | -2.832943000 |
| H | 1.738555000   | -1.439884000 | -3.851406000 |
| O | 1.256796000   | -1.362202000 | -1.833898000 |
| C | -1.842726000  | 0.625621000  | 1.052029000  |
| C | -0.830020000  | 1.496989000  | 1.220659000  |
| H | 3.570118000   | 1.385614000  | -2.395289000 |
| C | 2.334474000   | 2.416048000  | -0.965729000 |
| C | 3.468706000   | 2.257006000  | -1.755454000 |
| C | 2.162382000   | 3.529815000  | -0.150888000 |
| C | 4.463839000   | 3.233173000  | -1.711404000 |
| C | 3.165182000   | 4.498952000  | -0.114834000 |
| H | 1.263626000   | 3.637964000  | 0.447907000  |
| C | 4.313796000   | 4.351699000  | -0.891683000 |
| H | 5.355040000   | 3.118200000  | -2.321520000 |
| H | 3.043636000   | 5.371157000  | 0.520895000  |
| H | 5.090238000   | 5.110244000  | -0.861625000 |
| C | 0.379208000   | 1.657308000  | -2.086476000 |
| H | -0.375649000  | 0.869490000  | -2.029257000 |
| H | -0.088067000  | 2.637912000  | -1.961390000 |
| H | 0.896695000   | 1.607535000  | -3.047835000 |
| O | 1.323552000   | 1.433715000  | -1.013354000 |
| H | -0.759955000  | 2.388926000  | 0.602591000  |
| H | -0.145741000  | 1.426960000  | 2.063858000  |
| C | -2.953050000  | 0.774279000  | 0.061918000  |
| H | -2.750642000  | 1.621117000  | -0.606982000 |
| H | -3.011176000  | -0.130199000 | -0.557340000 |
| C | -4.307858000  | 0.983884000  | 0.765171000  |
| H | -4.502638000  | 0.136980000  | 1.438290000  |
| H | -4.252391000  | 1.878188000  | 1.400333000  |
| C | -5.464609000  | 1.124601000  | -0.225868000 |
| H | -5.263870000  | 1.969109000  | -0.901548000 |
| H | -5.509675000  | 0.228021000  | -0.861403000 |
| C | -6.817264000  | 1.333323000  | 0.456799000  |
| H | -7.019285000  | 0.488501000  | 1.131779000  |
| H | -6.769349000  | 2.227834000  | 1.095231000  |
| C | -7.976779000  | 1.479259000  | -0.530481000 |
| H | -7.774018000  | 2.323666000  | -1.204555000 |
| H | -8.023771000  | 0.585291000  | -1.168505000 |
| C | -9.324361000  | 1.687301000  | 0.156989000  |
| H | -9.571901000  | 0.842240000  | 0.810759000  |
| H | -9.319882000  | 2.593580000  | 0.774612000  |
| H | -10.133004000 | 1.788546000  | -0.574937000 |
| H | -1.920064000  | -0.225211000 | 1.731630000  |

**TS7',  $E_{(\text{SCF Done})} = -1443.497081$  a.u., IF =  $i266.0481$  cm<sup>-1</sup>**

|    |              |              |              |
|----|--------------|--------------|--------------|
| C  | -3.223950000 | 0.297744000  | 0.874566000  |
| C  | -3.017184000 | 1.573649000  | 0.266653000  |
| C  | -2.116894000 | 2.313958000  | 1.085941000  |
| C  | -1.731985000 | 1.480643000  | 2.178145000  |
| C  | -2.421730000 | 0.238201000  | 2.052591000  |
| C  | -3.763045000 | 2.113778000  | -0.920485000 |
| H  | -4.005649000 | 1.334734000  | -1.651804000 |
| H  | -3.200156000 | 2.900336000  | -1.434441000 |
| H  | -4.716935000 | 2.560942000  | -0.609361000 |
| C  | -1.799738000 | 3.769951000  | 0.917691000  |
| H  | -0.947920000 | 4.075973000  | 1.528556000  |
| H  | -2.660195000 | 4.377464000  | 1.228720000  |
| H  | -1.571598000 | 4.037079000  | -0.119516000 |
| C  | -0.867064000 | 1.888262000  | 3.335051000  |
| H  | -1.474733000 | 2.326785000  | 4.137833000  |
| H  | -0.125200000 | 2.640446000  | 3.049524000  |
| H  | -0.331777000 | 1.038995000  | 3.773045000  |
| C  | -2.438766000 | -0.861961000 | 3.073606000  |
| H  | -1.486388000 | -0.950830000 | 3.606930000  |
| H  | -2.665941000 | -1.835055000 | 2.628200000  |
| H  | -3.208668000 | -0.667675000 | 3.832505000  |
| C  | -4.297587000 | -0.675428000 | 0.484587000  |
| H  | -4.093145000 | -1.690932000 | 0.832236000  |
| H  | -5.252795000 | -0.365618000 | 0.930511000  |
| H  | -4.452184000 | -0.719516000 | -0.597748000 |
| Sc | -0.870350000 | 0.401985000  | 0.139827000  |
| C  | 0.403113000  | 2.106293000  | -1.516298000 |
| C  | 0.805893000  | 2.005452000  | -0.176638000 |
| C  | 0.603406000  | 3.226081000  | -2.317929000 |
| C  | 1.443967000  | 3.142342000  | 0.340372000  |
| C  | 1.265690000  | 4.319053000  | -1.758468000 |
| H  | 0.269977000  | 3.262382000  | -3.350062000 |
| C  | 1.677231000  | 4.282006000  | -0.426867000 |
| H  | 1.799400000  | 3.136323000  | 1.370230000  |
| H  | 1.454509000  | 5.197595000  | -2.368569000 |
| H  | 2.186656000  | 5.136653000  | 0.009218000  |
| C  | -0.926768000 | 0.997260000  | -3.246690000 |
| H  | -1.472492000 | 0.058171000  | -3.333523000 |
| H  | -1.619834000 | 1.840150000  | -3.320877000 |
| H  | -0.166716000 | 1.060059000  | -4.030843000 |
| O  | -0.299322000 | 0.971303000  | -1.961636000 |
| C  | 1.683168000  | 0.393480000  | 0.902309000  |
| C  | 0.811524000  | -0.661642000 | 1.256115000  |

|   |              |              |              |
|---|--------------|--------------|--------------|
| H | -3.086531000 | -2.378515000 | -2.617268000 |
| C | -1.976528000 | -2.681093000 | -0.798707000 |
| C | -2.980311000 | -2.974836000 | -1.715166000 |
| C | -1.800484000 | -3.431439000 | 0.358890000  |
| C | -3.845605000 | -4.035570000 | -1.450465000 |
| C | -2.674735000 | -4.488995000 | 0.614451000  |
| H | -0.995762000 | -3.192220000 | 1.047778000  |
| C | -3.695797000 | -4.790124000 | -0.286716000 |
| H | -4.637488000 | -4.270829000 | -2.155668000 |
| H | -2.550781000 | -5.080553000 | 1.517059000  |
| H | -4.371477000 | -5.615961000 | -0.084903000 |
| C | 0.026455000  | -2.083496000 | -1.861602000 |
| H | 0.661035000  | -1.222670000 | -2.068635000 |
| H | 0.582015000  | -2.843655000 | -1.304476000 |
| H | -0.342201000 | -2.513370000 | -2.797497000 |
| O | -1.093427000 | -1.616772000 | -1.075004000 |
| H | 0.968116000  | -1.625124000 | 0.770120000  |
| H | 0.467146000  | -0.718095000 | 2.287392000  |
| C | 2.861057000  | 0.141823000  | -0.015238000 |
| H | 2.550732000  | -0.476604000 | -0.867835000 |
| H | 3.243052000  | 1.082366000  | -0.424000000 |
| C | 3.990229000  | -0.576451000 | 0.744910000  |
| H | 4.273664000  | 0.022831000  | 1.621962000  |
| H | 3.621401000  | -1.534696000 | 1.133753000  |
| C | 5.223901000  | -0.811006000 | -0.129586000 |
| H | 4.938976000  | -1.405863000 | -1.010479000 |
| H | 5.585195000  | 0.152974000  | -0.516415000 |
| C | 6.359897000  | -1.517318000 | 0.612321000  |
| H | 6.644223000  | -0.922557000 | 1.492858000  |
| H | 5.998719000  | -2.481212000 | 1.000661000  |
| C | 7.596074000  | -1.754085000 | -0.257282000 |
| H | 7.311540000  | -2.348375000 | -1.137397000 |
| H | 7.955763000  | -0.790310000 | -0.644714000 |
| C | 8.726768000  | -2.457738000 | 0.489913000  |
| H | 9.057771000  | -1.870041000 | 1.354667000  |
| H | 8.408499000  | -3.440111000 | 0.859489000  |
| H | 9.596155000  | -2.612674000 | -0.158194000 |
| H | 1.880155000  | 1.120114000  | 1.687874000  |

59

**Q,  $E_{(\text{SCF Done})} = -1089.505919$  a.u.**

|    |              |             |              |
|----|--------------|-------------|--------------|
| Sc | 0.102928000  | 0.356962000 | 0.065368000  |
| C  | 1.387152000  | 2.086752000 | -1.052095000 |
| C  | 0.089646000  | 2.089700000 | -1.649581000 |
| C  | -0.856354000 | 2.487709000 | -0.656682000 |

|   |              |              |              |
|---|--------------|--------------|--------------|
| C | -0.138687000 | 2.726845000  | 0.556193000  |
| C | 1.246356000  | 2.489866000  | 0.309724000  |
| C | -0.201744000 | 1.841352000  | -3.103430000 |
| H | 0.023954000  | 2.735888000  | -3.698770000 |
| H | -1.256824000 | 1.607938000  | -3.280050000 |
| H | 0.402385000  | 1.028320000  | -3.524029000 |
| H | -1.247269000 | -0.552747000 | 2.227184000  |
| C | -0.717943000 | 3.238217000  | 1.844763000  |
| H | -0.198037000 | 2.834309000  | 2.720184000  |
| H | -1.781368000 | 2.999333000  | 1.946311000  |
| H | -0.632564000 | 4.331567000  | 1.899615000  |
| C | 2.370964000  | 2.744176000  | 1.269758000  |
| H | 2.743128000  | 3.771653000  | 1.159482000  |
| H | 3.217338000  | 2.072318000  | 1.098363000  |
| H | 2.057573000  | 2.621605000  | 2.310574000  |
| C | 2.686951000  | 1.843049000  | -1.763943000 |
| H | 3.427527000  | 1.361939000  | -1.117236000 |
| H | 2.559220000  | 1.214303000  | -2.651023000 |
| H | 3.123315000  | 2.791248000  | -2.105037000 |
| C | 2.639573000  | -1.949579000 | -0.125837000 |
| C | 3.435048000  | -2.441251000 | 0.904748000  |
| C | 3.218446000  | -2.011276000 | 2.218591000  |
| C | 2.211009000  | -1.091756000 | 2.493729000  |
| C | 1.430435000  | -0.607849000 | 1.438467000  |
| N | 1.672171000  | -1.057098000 | 0.180416000  |
| H | 3.846160000  | -2.396909000 | 3.018585000  |
| H | 4.222395000  | -3.155102000 | 0.680625000  |
| H | 2.038352000  | -0.748222000 | 3.509845000  |
| C | 2.779384000  | -2.396310000 | -1.554778000 |
| H | 3.806833000  | -2.736208000 | -1.726265000 |
| H | 2.614426000  | -1.534536000 | -2.212833000 |
| C | 1.800784000  | -3.521694000 | -1.918067000 |
| H | 1.924029000  | -3.812000000 | -2.966436000 |
| H | 1.971333000  | -4.409011000 | -1.299273000 |
| H | 0.761169000  | -3.206240000 | -1.772129000 |
| C | -2.575893000 | -1.361089000 | 0.744576000  |
| C | -3.638017000 | -2.221374000 | 0.449267000  |
| C | -3.944671000 | -2.520151000 | -0.871604000 |
| C | -3.180377000 | -1.949388000 | -1.890332000 |
| C | -2.141402000 | -1.108707000 | -1.530741000 |
| N | -1.837040000 | -0.817454000 | -0.247907000 |
| H | -4.766821000 | -3.189965000 | -1.107022000 |
| H | -4.213318000 | -2.652614000 | 1.262958000  |
| H | -3.382597000 | -2.151617000 | -2.936748000 |

|   |              |              |              |
|---|--------------|--------------|--------------|
| C | -2.252005000 | -0.996849000 | 2.169505000  |
| H | -2.197296000 | -1.916927000 | 2.764770000  |
| C | -3.286673000 | -0.048743000 | 2.791232000  |
| H | -4.281518000 | -0.505313000 | 2.814277000  |
| H | -3.005691000 | 0.193394000  | 3.820686000  |
| H | -3.361528000 | 0.887414000  | 2.228239000  |
| H | -1.521066000 | -0.640503000 | -2.292233000 |
| C | -2.321175000 | 2.735313000  | -0.880657000 |
| H | -2.906925000 | 2.609396000  | 0.035546000  |
| H | -2.490974000 | 3.762940000  | -1.227978000 |
| H | -2.747569000 | 2.068221000  | -1.637314000 |

18

**2c,  $E_{(\text{SCF Done})} = -235.712232$  a.u.**

|   |              |              |              |
|---|--------------|--------------|--------------|
| C | 3.264327000  | 0.037283000  | -0.000014000 |
| H | 3.496913000  | 1.101306000  | -0.000021000 |
| H | 4.111531000  | -0.643762000 | -0.000026000 |
| C | 2.008470000  | -0.409888000 | 0.000007000  |
| H | 1.839729000  | -1.488625000 | 0.000013000  |
| C | 0.770241000  | 0.456006000  | 0.000013000  |
| H | 0.785558000  | 1.120401000  | -0.876403000 |
| H | 0.785553000  | 1.120403000  | 0.876428000  |
| C | -0.532044000 | -0.347275000 | 0.000009000  |
| H | -0.549540000 | -1.008986000 | 0.878778000  |
| H | -0.549529000 | -1.008994000 | -0.878754000 |
| C | -1.785204000 | 0.527572000  | -0.000002000 |
| H | -1.764548000 | 1.189182000  | -0.877980000 |
| H | -1.764561000 | 1.189187000  | 0.877972000  |
| C | -3.081739000 | -0.279510000 | -0.000010000 |
| H | -3.961169000 | 0.374577000  | -0.000017000 |
| H | -3.147115000 | -0.924907000 | -0.884680000 |
| H | -3.147127000 | -0.924904000 | 0.884662000  |

17

**1d,  $E_{(\text{SCF Done})} = -326.750564$  a.u.**

|   |              |              |              |
|---|--------------|--------------|--------------|
| H | 1.988545000  | -1.342799000 | -0.871185000 |
| C | 0.377024000  | -0.279490000 | 0.000033000  |
| C | -0.041680000 | 1.054856000  | 0.000051000  |
| C | -1.406071000 | 1.339487000  | 0.000019000  |
| C | -2.313354000 | 0.286064000  | -0.000030000 |
| C | -1.801078000 | -1.011421000 | -0.000046000 |
| N | -0.499789000 | -1.297823000 | -0.000018000 |
| H | -1.750906000 | 2.370815000  | 0.000030000  |
| H | 0.684824000  | 1.861241000  | 0.000087000  |
| H | -3.386051000 | 0.457086000  | -0.000059000 |
| C | 1.832616000  | -0.692699000 | 0.000071000  |

|   |              |              |              |
|---|--------------|--------------|--------------|
| H | 1.988568000  | -1.342593000 | 0.871478000  |
| C | 2.860117000  | 0.433804000  | -0.000069000 |
| H | 2.764291000  | 1.071828000  | 0.886489000  |
| H | 3.874830000  | 0.021830000  | -0.000064000 |
| H | 2.764224000  | 1.071663000  | -0.886738000 |
| H | -2.475250000 | -1.867922000 | -0.000083000 |

60

**R,  $E_{(\text{SCF Done})} = -998.438446$  a.u.**

|    |              |              |              |
|----|--------------|--------------|--------------|
| Sc | 0.617672000  | -0.418040000 | -0.308726000 |
| C  | 2.662268000  | -0.464235000 | 0.971597000  |
| C  | 1.707391000  | -1.248346000 | 1.682105000  |
| C  | 1.395226000  | -2.396516000 | 0.885054000  |
| C  | 2.150101000  | -2.310019000 | -0.322051000 |
| C  | 2.925786000  | -1.109778000 | -0.276073000 |
| C  | 1.189885000  | -0.985415000 | 3.068553000  |
| H  | 1.799887000  | -1.512409000 | 3.814072000  |
| H  | 0.159353000  | -1.333460000 | 3.204139000  |
| H  | 1.220736000  | 0.077704000  | 3.326496000  |
| C  | 0.528269000  | -3.543508000 | 1.321657000  |
| H  | 1.082841000  | -4.205424000 | 1.999665000  |
| H  | 0.200556000  | -4.160558000 | 0.479320000  |
| H  | -0.364380000 | -3.215496000 | 1.867324000  |
| C  | 2.211473000  | -3.339114000 | -1.414961000 |
| H  | 2.341634000  | -2.887473000 | -2.404652000 |
| H  | 1.317001000  | -3.969125000 | -1.447972000 |
| H  | 3.066691000  | -4.009977000 | -1.260742000 |
| C  | 3.952674000  | -0.688946000 | -1.287276000 |
| H  | 4.921243000  | -1.157817000 | -1.068424000 |
| H  | 4.105766000  | 0.393769000  | -1.286252000 |
| H  | 3.675226000  | -0.982481000 | -2.304613000 |
| C  | 3.340469000  | 0.778716000  | 1.468265000  |
| H  | 4.307090000  | 0.529079000  | 1.925058000  |
| H  | 3.538949000  | 1.489657000  | 0.660145000  |
| H  | 2.749134000  | 1.295561000  | 2.229975000  |
| C  | -0.019188000 | 2.922503000  | 0.146866000  |
| C  | 0.302919000  | 3.973618000  | -0.703715000 |
| C  | 0.949043000  | 3.716269000  | -1.920757000 |
| C  | 1.273977000  | 2.413613000  | -2.280855000 |
| C  | 0.939396000  | 1.374074000  | -1.406260000 |
| N  | 0.305751000  | 1.666378000  | -0.241936000 |
| H  | 1.196738000  | 4.546840000  | -2.577611000 |
| H  | 0.056355000  | 4.992008000  | -0.424185000 |
| H  | 1.778842000  | 2.204540000  | -3.219474000 |
| C  | -0.709791000 | 3.076050000  | 1.478312000  |

|   |              |              |              |
|---|--------------|--------------|--------------|
| H | -0.079542000 | 2.593566000  | 2.238433000  |
| H | -1.636531000 | 2.484704000  | 1.447725000  |
| C | -2.023710000 | -0.846479000 | -1.253521000 |
| C | -1.170047000 | -1.829107000 | -1.611668000 |
| H | -2.046091000 | 0.064487000  | -1.857492000 |
| H | -0.563669000 | -1.746539000 | -2.516087000 |
| H | -1.156851000 | -2.787130000 | -1.093594000 |
| C | -1.029187000 | 4.505084000  | 1.905062000  |
| H | -1.519264000 | 4.501831000  | 2.883088000  |
| H | -0.122638000 | 5.113532000  | 1.993599000  |
| H | -1.706980000 | 4.998301000  | 1.199849000  |
| C | -3.011349000 | -0.916669000 | -0.132023000 |
| C | -4.459988000 | -0.894435000 | -0.663462000 |
| H | -2.879549000 | -0.050827000 | 0.534811000  |
| H | -2.849625000 | -1.823181000 | 0.465195000  |
| C | -5.494687000 | -0.928919000 | 0.463126000  |
| H | -4.609811000 | 0.006392000  | -1.274554000 |
| H | -4.607250000 | -1.753206000 | -1.331358000 |
| C | -6.929385000 | -0.916443000 | -0.059498000 |
| H | -5.333645000 | -1.826239000 | 1.076522000  |
| H | -5.335904000 | -0.067980000 | 1.127795000  |
| H | -7.647053000 | -0.942028000 | 0.766868000  |
| H | -7.131882000 | -0.014084000 | -0.648220000 |
| H | -7.128024000 | -1.784345000 | -0.698921000 |

60

**TS8,  $E_{(\text{SCF Done})} = -998.419052$  a.u.,  $IF = i262.3178$  cm<sup>-1</sup>**

|    |             |              |              |
|----|-------------|--------------|--------------|
| Sc | 0.575010000 | -0.487546000 | -0.184754000 |
| C  | 2.975980000 | -0.192392000 | -0.075857000 |
| C  | 2.566358000 | -0.661102000 | 1.205661000  |
| C  | 2.052745000 | -1.989849000 | 1.046662000  |
| C  | 2.154029000 | -2.343682000 | -0.328696000 |
| C  | 2.694552000 | -1.221341000 | -1.029958000 |
| C  | 2.754897000 | 0.035388000  | 2.523897000  |
| H  | 3.647971000 | -0.347586000 | 3.034801000  |
| H  | 1.911505000 | -0.120664000 | 3.206383000  |
| H  | 2.891540000 | 1.113836000  | 2.406582000  |
| C  | 1.600592000 | -2.886739000 | 2.163300000  |
| H  | 2.457059000 | -3.409721000 | 2.609112000  |
| H  | 0.901356000 | -3.654465000 | 1.818005000  |
| H  | 1.115594000 | -2.331173000 | 2.973837000  |
| C  | 1.864499000 | -3.691465000 | -0.920420000 |
| H  | 1.549108000 | -3.627939000 | -1.967221000 |
| H  | 1.087741000 | -4.228818000 | -0.367982000 |
| H  | 2.766374000 | -4.317256000 | -0.898796000 |

|   |              |              |              |
|---|--------------|--------------|--------------|
| C | 3.037045000  | -1.177204000 | -2.494256000 |
| H | 4.046625000  | -1.572772000 | -2.667214000 |
| H | 3.024505000  | -0.157039000 | -2.892772000 |
| H | 2.353639000  | -1.781325000 | -3.101029000 |
| C | 3.677443000  | 1.100228000  | -0.381209000 |
| H | 4.756567000  | 0.931349000  | -0.491647000 |
| H | 3.332635000  | 1.558299000  | -1.315244000 |
| H | 3.551500000  | 1.836463000  | 0.417481000  |
| C | -0.107818000 | 2.867055000  | 0.135036000  |
| C | -0.741385000 | 3.703619000  | -0.780379000 |
| C | -1.428737000 | 3.157867000  | -1.869447000 |
| C | -1.529119000 | 1.778172000  | -2.008298000 |
| C | -0.880666000 | 0.977775000  | -1.066572000 |
| N | -0.176138000 | 1.527480000  | -0.061562000 |
| H | -1.892602000 | 3.817827000  | -2.598161000 |
| H | -0.692380000 | 4.779052000  | -0.652086000 |
| H | -2.095502000 | 1.337373000  | -2.824193000 |
| C | 0.648575000  | 3.347625000  | 1.344452000  |
| H | 1.660327000  | 2.924770000  | 1.293001000  |
| H | 0.184718000  | 2.888370000  | 2.228561000  |
| C | -1.887682000 | -0.846029000 | -0.878115000 |
| C | -1.093797000 | -1.953718000 | -0.479490000 |
| H | -2.132511000 | -0.783875000 | -1.938441000 |
| H | -0.784969000 | -2.674234000 | -1.236293000 |
| H | -1.285632000 | -2.385513000 | 0.506470000  |
| C | 0.725988000  | 4.859717000  | 1.527908000  |
| H | 1.295096000  | 5.094218000  | 2.432067000  |
| H | 1.230403000  | 5.347495000  | 0.686599000  |
| H | -0.267144000 | 5.307465000  | 1.642367000  |
| C | -2.981893000 | -0.353922000 | 0.053771000  |
| C | -4.196784000 | -1.296212000 | 0.005329000  |
| H | -3.304524000 | 0.658666000  | -0.211256000 |
| H | -2.599079000 | -0.306402000 | 1.083850000  |
| C | -5.339279000 | -0.820232000 | 0.905836000  |
| H | -4.555477000 | -1.372084000 | -1.031130000 |
| H | -3.888518000 | -2.307809000 | 0.299432000  |
| C | -6.548808000 | -1.751468000 | 0.862050000  |
| H | -4.975519000 | -0.737160000 | 1.939800000  |
| H | -5.642656000 | 0.192188000  | 0.604780000  |
| H | -7.348740000 | -1.387689000 | 1.515252000  |
| H | -6.956779000 | -1.826944000 | -0.152759000 |
| H | -6.284894000 | -2.763342000 | 1.191382000  |

76

**Q',  $E_{(\text{SCF Done})} = -1416.297765$  a.u.**



|    |              |              |              |
|----|--------------|--------------|--------------|
| Sc | -0.114255000 | 0.336446000  | -0.301561000 |
| C  | 0.295795000  | 2.201392000  | -1.884028000 |
| C  | 0.463976000  | 0.998949000  | -2.628039000 |
| C  | -0.803342000 | 0.343343000  | -2.698833000 |
| C  | -1.750632000 | 1.149723000  | -1.997096000 |
| C  | -1.069716000 | 2.296441000  | -1.493444000 |
| C  | 1.714759000  | 0.624263000  | -3.372792000 |
| H  | 1.889014000  | 1.326501000  | -4.198702000 |
| H  | 1.647888000  | -0.372572000 | -3.817715000 |
| H  | 2.611970000  | 0.651051000  | -2.743200000 |
| H  | 1.287962000  | -1.756671000 | -2.070607000 |
| C  | -3.235655000 | 0.933552000  | -1.978343000 |
| H  | -3.706845000 | 1.366123000  | -1.089971000 |
| H  | -3.503734000 | -0.127236000 | -2.012106000 |
| H  | -3.703504000 | 1.410421000  | -2.850290000 |
| C  | -1.701226000 | 3.487263000  | -0.833315000 |
| H  | -1.926698000 | 4.264964000  | -1.575701000 |
| H  | -1.045364000 | 3.935035000  | -0.080409000 |
| H  | -2.646951000 | 3.235365000  | -0.342880000 |
| C  | 1.337374000  | 3.260890000  | -1.684504000 |
| H  | 1.218794000  | 3.779836000  | -0.727925000 |
| H  | 2.350992000  | 2.849860000  | -1.717756000 |
| H  | 1.270143000  | 4.020634000  | -2.475279000 |
| C  | 2.657354000  | 1.716831000  | 1.278903000  |
| C  | 2.683634000  | 2.611988000  | 2.348112000  |
| C  | 1.485168000  | 3.030078000  | 2.930677000  |
| C  | 0.272256000  | 2.549793000  | 2.441416000  |
| C  | 0.280580000  | 1.653816000  | 1.366908000  |
| N  | 1.463795000  | 1.275907000  | 0.835984000  |
| H  | 1.507099000  | 3.733432000  | 3.760201000  |
| H  | 3.636227000  | 2.983455000  | 2.715650000  |
| H  | -0.665183000 | 2.874491000  | 2.886020000  |
| C  | 3.914194000  | 1.207546000  | 0.625857000  |
| H  | 4.601889000  | 2.047225000  | 0.465319000  |
| H  | 3.656209000  | 0.810629000  | -0.362282000 |
| C  | 4.621752000  | 0.126827000  | 1.454239000  |
| H  | 5.533577000  | -0.208248000 | 0.948771000  |
| H  | 4.906771000  | 0.506668000  | 2.441235000  |
| H  | 3.974363000  | -0.744020000 | 1.603939000  |
| C  | 1.613947000  | -2.716658000 | -0.204930000 |
| C  | 2.114062000  | -3.805230000 | 0.520232000  |
| C  | 1.939539000  | -3.866353000 | 1.895250000  |
| C  | 1.263315000  | -2.825211000 | 2.530482000  |
| C  | 0.789566000  | -1.783658000 | 1.750022000  |

|   |              |              |              |
|---|--------------|--------------|--------------|
| N | 0.948324000  | -1.718312000 | 0.411887000  |
| H | 2.322798000  | -4.709225000 | 2.463573000  |
| H | 2.635091000  | -4.599089000 | -0.006290000 |
| H | 1.103346000  | -2.818534000 | 3.603581000  |
| C | 1.810854000  | -2.641861000 | -1.694837000 |
| H | 1.333810000  | -3.514860000 | -2.161571000 |
| C | 3.284674000  | -2.591684000 | -2.115889000 |
| H | 3.826422000  | -3.488743000 | -1.798932000 |
| H | 3.365443000  | -2.525360000 | -3.205244000 |
| H | 3.791480000  | -1.723095000 | -1.683386000 |
| H | 0.258045000  | -0.953276000 | 2.209523000  |
| C | -1.148071000 | -0.841395000 | -3.557405000 |
| H | -1.984527000 | -1.420096000 | -3.151281000 |
| H | -1.453371000 | -0.511968000 | -4.559905000 |
| H | -0.305230000 | -1.526475000 | -3.695637000 |
| H | -2.564960000 | 1.522699000  | 1.254606000  |
| C | -3.036275000 | -0.543511000 | 1.239013000  |
| C | -4.133151000 | -1.391714000 | 1.420613000  |
| C | -4.206861000 | -2.601751000 | 0.741384000  |
| C | -3.170253000 | -2.951106000 | -0.119258000 |
| C | -2.112074000 | -2.064783000 | -0.249988000 |
| N | -2.029521000 | -0.890093000 | 0.401219000  |
| H | -5.060333000 | -3.259386000 | 0.880815000  |
| H | -4.929935000 | -1.096681000 | 2.093407000  |
| H | -3.176320000 | -3.881664000 | -0.677165000 |
| C | -2.914994000 | 0.769548000  | 1.969857000  |
| H | -2.095841000 | 0.674653000  | 2.696054000  |
| C | -4.173094000 | 1.262775000  | 2.679418000  |
| H | -4.474762000 | 0.599376000  | 3.497273000  |
| H | -3.987220000 | 2.248240000  | 3.117330000  |
| H | -5.018419000 | 1.362939000  | 1.989389000  |
| H | -1.283708000 | -2.304885000 | -0.911385000 |

77

**R',  $E_{(\text{SCF Done})} = -1325.233588$  a.u.**

|    |              |              |              |
|----|--------------|--------------|--------------|
| Sc | -0.640230000 | -0.062720000 | -0.436431000 |
| C  | -2.897503000 | -0.987965000 | -0.682796000 |
| C  | -3.019506000 | 0.420513000  | -0.881638000 |
| C  | -2.334617000 | 0.754409000  | -2.089456000 |
| C  | -1.778356000 | -0.449606000 | -2.620455000 |
| C  | -2.139512000 | -1.525172000 | -1.762469000 |
| C  | -3.885591000 | 1.321887000  | -0.046536000 |
| H  | -4.946685000 | 1.096253000  | -0.215747000 |
| H  | -3.743566000 | 2.377976000  | -0.290142000 |
| H  | -3.706472000 | 1.203369000  | 1.029023000  |

|   |              |              |              |
|---|--------------|--------------|--------------|
| H | -1.415735000 | 2.740542000  | -0.429154000 |
| C | -1.103969000 | -0.596890000 | -3.954435000 |
| H | -0.253949000 | -1.288027000 | -3.922494000 |
| H | -0.746505000 | 0.359758000  | -4.348704000 |
| H | -1.807188000 | -0.997723000 | -4.696705000 |
| C | -1.916325000 | -2.980788000 | -2.044340000 |
| H | -2.755902000 | -3.390277000 | -2.622699000 |
| H | -1.836082000 | -3.572064000 | -1.127332000 |
| H | -1.006345000 | -3.150389000 | -2.627630000 |
| C | -3.617499000 | -1.782270000 | 0.366385000  |
| H | -3.077627000 | -2.695735000 | 0.633052000  |
| H | -3.777682000 | -1.206507000 | 1.283356000  |
| H | -4.608180000 | -2.087555000 | 0.002776000  |
| C | -0.487525000 | -2.419589000 | 2.103522000  |
| C | 0.218675000  | -3.621680000 | 2.117995000  |
| C | 1.029393000  | -3.965722000 | 1.032471000  |
| C | 1.128612000  | -3.109361000 | -0.061275000 |
| C | 0.397244000  | -1.917271000 | -0.051172000 |
| N | -0.367099000 | -1.621690000 | 1.020209000  |
| H | 1.575602000  | -4.906211000 | 1.048163000  |
| H | 0.133367000  | -4.286885000 | 2.972361000  |
| H | 1.754664000  | -3.371325000 | -0.910317000 |
| C | -1.361422000 | -1.973966000 | 3.247746000  |
| H | -2.173267000 | -2.701925000 | 3.378405000  |
| H | -1.833367000 | -1.025518000 | 2.969761000  |
| C | 2.015181000  | 0.132590000  | -1.771755000 |
| C | 1.225923000  | 1.212935000  | -1.943266000 |
| H | 0.502395000  | 1.259812000  | -2.752110000 |
| H | 1.401406000  | 2.127288000  | -1.379277000 |
| C | -0.612341000 | -1.816965000 | 4.576410000  |
| H | -1.302408000 | -1.500164000 | 5.364878000  |
| H | -0.152974000 | -2.757704000 | 4.897079000  |
| H | 0.180869000  | -1.065014000 | 4.501576000  |
| C | 3.197906000  | 0.062375000  | -0.857572000 |
| C | 4.514261000  | 0.021298000  | -1.657925000 |
| H | 3.133886000  | -0.842456000 | -0.239201000 |
| H | 3.205242000  | 0.926168000  | -0.180535000 |
| C | 5.746088000  | -0.084549000 | -0.756774000 |
| H | 4.493523000  | -0.832065000 | -2.350454000 |
| H | 4.586727000  | 0.923007000  | -2.280652000 |
| C | 7.052872000  | -0.124631000 | -1.545685000 |
| H | 5.761222000  | 0.767474000  | -0.062445000 |
| H | 5.662851000  | -0.986741000 | -0.134272000 |
| H | 7.916006000  | -0.199537000 | -0.875888000 |

|   |              |              |              |
|---|--------------|--------------|--------------|
| H | 7.082432000  | -0.985964000 | -2.223446000 |
| H | 7.179875000  | 0.780119000  | -2.151748000 |
| C | -0.011091000 | 2.926989000  | 1.150436000  |
| C | 0.663602000  | 3.733235000  | 2.073223000  |
| C | 1.519713000  | 3.164855000  | 3.005989000  |
| C | 1.687700000  | 1.782309000  | 2.999146000  |
| C | 0.988533000  | 1.041499000  | 2.059617000  |
| N | 0.151179000  | 1.582534000  | 1.147081000  |
| H | 2.047770000  | 3.787829000  | 3.722443000  |
| H | 0.515933000  | 4.807894000  | 2.047227000  |
| H | 2.345383000  | 1.283067000  | 3.703081000  |
| C | -0.911792000 | 3.545430000  | 0.115394000  |
| H | -0.289770000 | 4.073803000  | -0.621584000 |
| C | -1.952210000 | 4.518863000  | 0.679471000  |
| H | -1.485924000 | 5.391985000  | 1.146528000  |
| H | -2.594275000 | 4.890182000  | -0.125591000 |
| H | -2.587724000 | 4.034913000  | 1.427930000  |
| H | 1.855541000  | -0.734734000 | -2.413201000 |
| H | 1.092454000  | -0.036751000 | 2.025390000  |
| C | -2.380681000 | 2.069780000  | -2.817280000 |
| H | -1.397418000 | 2.422280000  | -3.152236000 |
| H | -3.004478000 | 1.980684000  | -3.716044000 |
| H | -2.821945000 | 2.862824000  | -2.207274000 |

77

**TS8',  $E_{(\text{SCF Done})} = -1325.223391$  a.u., IF =  $i239.0532$  cm<sup>-1</sup>**

|    |              |              |              |
|----|--------------|--------------|--------------|
| Sc | -0.401778000 | -0.236985000 | -0.428820000 |
| C  | -2.440743000 | -1.623311000 | -0.417219000 |
| C  | -2.761750000 | -0.441964000 | -1.152485000 |
| C  | -1.971584000 | -0.432266000 | -2.338340000 |
| C  | -1.155467000 | -1.603811000 | -2.329687000 |
| C  | -1.466825000 | -2.351097000 | -1.155239000 |
| C  | -3.900218000 | 0.481004000  | -0.825303000 |
| H  | -4.859363000 | -0.032247000 | -0.975867000 |
| H  | -3.910276000 | 1.363138000  | -1.471284000 |
| H  | -3.885638000 | 0.824321000  | 0.215775000  |
| H  | -1.766278000 | 2.336592000  | -1.112778000 |
| C  | -0.246191000 | -2.050213000 | -3.438178000 |
| H  | 0.536593000  | -2.723758000 | -3.075421000 |
| H  | 0.244985000  | -1.207879000 | -3.938097000 |
| H  | -0.807104000 | -2.594259000 | -4.210008000 |
| C  | -0.954344000 | -3.723536000 | -0.835009000 |
| H  | -1.519335000 | -4.481596000 | -1.393596000 |
| H  | -1.060418000 | -3.965133000 | 0.226636000  |
| H  | 0.099994000  | -3.848245000 | -1.102385000 |

|   |              |              |              |
|---|--------------|--------------|--------------|
| C | -3.142941000 | -2.068632000 | 0.833440000  |
| H | -2.573864000 | -2.827363000 | 1.379201000  |
| H | -3.339594000 | -1.236144000 | 1.519337000  |
| H | -4.117732000 | -2.515067000 | 0.593802000  |
| C | 1.153447000  | -2.502017000 | 1.715918000  |
| C | 2.193381000  | -3.388459000 | 1.447569000  |
| C | 2.917338000  | -3.273783000 | 0.259787000  |
| C | 2.610608000  | -2.252675000 | -0.631482000 |
| C | 1.568916000  | -1.378391000 | -0.314072000 |
| N | 0.872464000  | -1.520819000 | 0.823750000  |
| H | 3.710643000  | -3.982804000 | 0.036101000  |
| H | 2.421172000  | -4.176095000 | 2.159849000  |
| H | 3.173449000  | -2.136096000 | -1.554005000 |
| C | 0.357717000  | -2.596237000 | 2.989386000  |
| H | 0.198127000  | -3.654147000 | 3.229530000  |
| H | -0.635680000 | -2.162930000 | 2.828778000  |
| C | 1.953165000  | 0.429247000  | -1.371047000 |
| C | 0.839051000  | 1.233609000  | -1.678600000 |
| H | 0.434516000  | 1.219773000  | -2.687246000 |
| H | 0.758576000  | 2.184581000  | -1.153280000 |
| C | 1.056850000  | -1.915310000 | 4.175429000  |
| H | 0.445058000  | -1.999725000 | 5.079475000  |
| H | 2.025198000  | -2.382934000 | 4.381528000  |
| H | 1.240527000  | -0.852504000 | 3.981059000  |
| C | 3.001709000  | 0.964589000  | -0.412021000 |
| C | 3.895758000  | 2.003646000  | -1.109592000 |
| H | 3.632208000  | 0.159845000  | -0.019294000 |
| H | 2.506937000  | 1.431509000  | 0.451816000  |
| C | 4.993650000  | 2.542825000  | -0.190011000 |
| H | 4.355443000  | 1.547946000  | -1.998455000 |
| H | 3.277051000  | 2.833261000  | -1.475804000 |
| C | 5.885277000  | 3.574728000  | -0.877297000 |
| H | 4.532103000  | 2.990408000  | 0.701865000  |
| H | 5.609111000  | 1.706939000  | 0.170990000  |
| H | 6.659830000  | 3.943416000  | -0.196551000 |
| H | 6.388373000  | 3.145894000  | -1.752011000 |
| H | 5.303704000  | 4.439196000  | -1.219102000 |
| C | -1.576516000 | 2.646921000  | 0.978544000  |
| C | -1.944767000 | 3.421656000  | 2.082736000  |
| C | -1.793711000 | 2.928538000  | 3.372600000  |
| C | -1.266546000 | 1.651769000  | 3.542510000  |
| C | -0.919426000 | 0.937085000  | 2.406960000  |
| N | -1.067038000 | 1.401211000  | 1.149298000  |
| H | -2.081021000 | 3.531677000  | 4.229262000  |

|   |              |              |              |
|---|--------------|--------------|--------------|
| H | -2.351517000 | 4.413951000  | 1.923970000  |
| H | -1.125003000 | 1.215982000  | 4.525837000  |
| C | -1.701503000 | 3.185386000  | -0.424156000 |
| H | -0.764375000 | 3.702995000  | -0.675940000 |
| C | -2.868910000 | 4.144575000  | -0.663667000 |
| H | -2.743089000 | 5.091934000  | -0.129840000 |
| H | -2.933190000 | 4.387760000  | -1.728762000 |
| H | -3.824073000 | 3.705173000  | -0.358273000 |
| H | 2.340589000  | -0.197155000 | -2.173431000 |
| H | -0.497129000 | -0.057749000 | 2.493611000  |
| C | -2.116434000 | 0.518375000  | -3.491277000 |
| H | -1.217672000 | 0.549446000  | -4.115226000 |
| H | -2.942083000 | 0.204316000  | -4.143870000 |
| H | -2.334347000 | 1.544213000  | -3.175196000 |

109

**D'', E<sub>(SCF Done)</sub> = -2976.513701 a.u.**

|    |              |              |              |
|----|--------------|--------------|--------------|
| S  | -1.885818000 | -2.209801000 | -0.386077000 |
| S  | 1.753815000  | -2.560120000 | -0.087306000 |
| S  | 1.371519000  | 1.678527000  | -0.786044000 |
| S  | -2.029747000 | 1.404921000  | -0.667703000 |
| Sc | 0.037007000  | -0.240552000 | 0.422400000  |
| C  | 1.614530000  | 1.934636000  | 2.767424000  |
| H  | 1.319524000  | 2.834257000  | 2.218902000  |
| H  | 2.621995000  | 1.659945000  | 2.440354000  |
| H  | 1.687918000  | 2.208832000  | 3.829205000  |
| C  | -1.550490000 | 2.213048000  | 2.651504000  |
| H  | -1.832834000 | 2.356840000  | 3.703754000  |
| H  | -2.481971000 | 2.217769000  | 2.074745000  |
| H  | -0.960638000 | 3.088583000  | 2.364796000  |
| C  | -2.798231000 | -0.679840000 | 2.713715000  |
| H  | -3.430907000 | 0.022503000  | 2.160431000  |
| H  | -3.094697000 | -0.606763000 | 3.769874000  |
| C  | -0.474377000 | -2.762827000 | 3.016253000  |
| H  | -1.224859000 | -2.874201000 | 3.808184000  |
| H  | 0.445028000  | -3.216633000 | 3.396519000  |
| H  | -0.821532000 | -3.355738000 | 2.162007000  |
| C  | 2.325905000  | -1.104985000 | 3.006411000  |
| H  | 2.633666000  | -0.799383000 | 4.015264000  |
| H  | 2.366256000  | -2.196484000 | 2.976444000  |
| H  | 3.089653000  | -0.737706000 | 2.311921000  |
| C  | -0.276243000 | -1.307319000 | 2.697352000  |
| C  | 7.393913000  | 4.333190000  | 0.367665000  |
| H  | 7.785321000  | 5.328929000  | 0.601663000  |
| H  | 7.705775000  | 3.656264000  | 1.172238000  |

|   |              |              |              |
|---|--------------|--------------|--------------|
| H | 7.877336000  | 3.995341000  | -0.556873000 |
| C | 5.874215000  | 4.357495000  | 0.221266000  |
| H | 5.420941000  | 4.733591000  | 1.149274000  |
| H | 5.591673000  | 5.069260000  | -0.566887000 |
| C | 5.284925000  | 2.983952000  | -0.106756000 |
| H | 5.567886000  | 2.269921000  | 0.680887000  |
| H | 5.735397000  | 2.608409000  | -1.037172000 |
| C | 3.760285000  | 3.006934000  | -0.252444000 |
| H | 3.474157000  | 3.718248000  | -1.038371000 |
| H | 3.309155000  | 3.371700000  | 0.679217000  |
| C | 3.201976000  | 1.629539000  | -0.596848000 |
| H | 3.470971000  | 0.888430000  | 0.163779000  |
| H | 3.597088000  | 1.287217000  | -1.559614000 |
| C | -0.775880000 | 0.937195000  | 2.502777000  |
| C | 0.965262000  | 0.093499000  | -1.592060000 |
| C | -3.706440000 | 7.868899000  | -1.285449000 |
| H | -4.618278000 | 8.441333000  | -1.486109000 |
| H | -3.309490000 | 8.204427000  | -0.319816000 |
| H | -2.972312000 | 8.132540000  | -2.056266000 |
| C | -3.987565000 | 6.368083000  | -1.277834000 |
| H | -4.751131000 | 6.140212000  | -0.520993000 |
| H | -4.416848000 | 6.069324000  | -2.244522000 |
| C | -2.737755000 | 5.529550000  | -1.001030000 |
| H | -2.307322000 | 5.827237000  | -0.033635000 |
| H | -1.973347000 | 5.755342000  | -1.758843000 |
| C | -3.018892000 | 4.023470000  | -0.991329000 |
| H | -3.449508000 | 3.731282000  | -1.958203000 |
| H | -3.773471000 | 3.789992000  | -0.228945000 |
| C | -1.752878000 | 3.218631000  | -0.715026000 |
| H | -1.333951000 | 3.473814000  | 0.260878000  |
| H | -0.973426000 | 3.412608000  | -1.460113000 |
| C | -1.338687000 | -0.370666000 | 2.558223000  |
| C | -2.226816000 | 1.084273000  | -2.444477000 |
| H | -1.425078000 | 1.564766000  | -3.012122000 |
| H | -2.173338000 | 0.005950000  | -2.598325000 |
| H | -3.196352000 | 1.451209000  | -2.789320000 |
| C | -1.549944000 | -2.964987000 | -2.001789000 |
| C | 0.952098000  | -0.576643000 | 2.698797000  |
| C | -3.665164000 | -1.797216000 | -0.587434000 |
| H | -3.866026000 | -0.986886000 | 0.117936000  |
| H | -3.806948000 | -1.391317000 | -1.595630000 |
| C | 2.142512000  | -3.054636000 | -1.817352000 |
| C | 3.605734000  | -2.870658000 | -2.218940000 |
| H | 3.878711000  | -1.811716000 | -2.114820000 |

|   |              |              |              |
|---|--------------|--------------|--------------|
| H | 3.668297000  | -3.098161000 | -3.293468000 |
| C | 4.613043000  | -3.733522000 | -1.460750000 |
| H | 4.329513000  | -4.793184000 | -1.551101000 |
| H | 4.575841000  | -3.486219000 | -0.390057000 |
| C | 6.047437000  | -3.553610000 | -1.962937000 |
| H | 6.089251000  | -3.797983000 | -3.033507000 |
| H | 6.328275000  | -2.493978000 | -1.880900000 |
| C | 7.057426000  | -4.410241000 | -1.203057000 |
| H | 6.823876000  | -5.477669000 | -1.296219000 |
| H | 7.065258000  | -4.163508000 | -0.134352000 |
| H | 0.428847000  | 0.287828000  | -2.525292000 |
| H | 1.915195000  | -0.386814000 | -1.847030000 |
| H | -3.042774000 | -1.695637000 | 2.386815000  |
| H | -0.559749000 | -3.417696000 | -1.950761000 |
| H | -1.568520000 | -2.228545000 | -2.809537000 |
| H | 1.836686000  | -4.102623000 | -1.921041000 |
| H | -2.285312000 | -3.749880000 | -2.195930000 |
| C | -4.590502000 | -2.984184000 | -0.335212000 |
| H | -4.331471000 | -3.814600000 | -1.005785000 |
| H | -4.435222000 | -3.352295000 | 0.687067000  |
| C | -6.062220000 | -2.610510000 | -0.536931000 |
| H | -6.322149000 | -1.775056000 | 0.129547000  |
| H | -6.210288000 | -2.241502000 | -1.562588000 |
| C | -7.015485000 | -3.779406000 | -0.278171000 |
| H | -6.753346000 | -4.614135000 | -0.943349000 |
| H | -6.866613000 | -4.147243000 | 0.746612000  |
| C | -8.482232000 | -3.406008000 | -0.479867000 |
| H | -8.669740000 | -3.068071000 | -1.506160000 |
| H | -9.138237000 | -4.261530000 | -0.287431000 |
| H | -8.783928000 | -2.597474000 | 0.196770000  |
| C | 0.639096000  | 0.810502000  | 2.583281000  |
| H | 8.072401000  | -4.259176000 | -1.585472000 |
| C | 1.776088000  | -4.188989000 | 0.724005000  |
| H | 0.936063000  | -4.804797000 | 0.390837000  |
| H | 2.720214000  | -4.693330000 | 0.508317000  |
| H | 1.697531000  | -4.035675000 | 1.799725000  |
| H | 1.494571000  | -2.455028000 | -2.461602000 |

112

**TS2'',  $E_{(\text{SCF Done})} = -2655.655314$  a.u., IF =  $i226.6671$  cm<sup>-1</sup>**

|   |              |              |             |
|---|--------------|--------------|-------------|
| C | 0.988075000  | -0.098880000 | 2.894528000 |
| C | 0.492618000  | 1.213764000  | 2.646454000 |
| C | -0.916612000 | 1.125445000  | 2.466922000 |
| C | -1.292941000 | -0.242658000 | 2.605915000 |
| C | -0.119600000 | -1.001981000 | 2.878942000 |



|    |               |               |               |
|----|---------------|---------------|---------------|
| C  | 1. 271782000  | 2. 488248000  | 2. 781986000  |
| H  | 0. 908294000  | 3. 270329000  | 2. 107902000  |
| H  | 2. 339592000  | 2. 345679000  | 2. 589504000  |
| H  | 1. 186710000  | 2. 879088000  | 3. 805329000  |
| C  | -1. 865980000 | 2. 286006000  | 2. 433249000  |
| H  | -2. 193341000 | 2. 533151000  | 3. 452855000  |
| H  | -2. 772752000 | 2. 073193000  | 1. 857209000  |
| H  | -1. 401310000 | 3. 189752000  | 2. 026565000  |
| C  | -2. 704230000 | -0. 747955000 | 2. 669603000  |
| H  | -3. 362587000 | -0. 223193000 | 1. 969026000  |
| H  | -3. 118746000 | -0. 593155000 | 3. 675532000  |
| C  | -0. 102949000 | -2. 449176000 | 3. 272755000  |
| H  | -0. 379858000 | -2. 559282000 | 4. 329736000  |
| H  | 0. 885760000  | -2. 902145000 | 3. 155439000  |
| H  | -0. 811929000 | -3. 044286000 | 2. 687555000  |
| C  | 2. 400800000  | -0. 428759000 | 3. 286069000  |
| H  | 2. 579873000  | -0. 164477000 | 4. 336865000  |
| H  | 2. 620379000  | -1. 495843000 | 3. 188367000  |
| H  | 3. 144810000  | 0. 117491000  | 2. 693782000  |
| Sc | 0. 167344000  | -0. 114521000 | 0. 577820000  |
| C  | 6. 564976000  | 5. 632539000  | 0. 393223000  |
| H  | 6. 783367000  | 6. 702523000  | 0. 474574000  |
| H  | 6. 874710000  | 5. 158083000  | 1. 332158000  |
| H  | 7. 193088000  | 5. 225539000  | -0. 408200000 |
| C  | 5. 083428000  | 5. 392493000  | 0. 112556000  |
| H  | 4. 479290000  | 5. 841972000  | 0. 913122000  |
| H  | 4. 795800000  | 5. 908359000  | -0. 814085000 |
| C  | 4. 734048000  | 3. 907589000  | -0. 009205000 |
| H  | 5. 021319000  | 3. 389712000  | 0. 917802000  |
| H  | 5. 336074000  | 3. 457188000  | -0. 811828000 |
| C  | 3. 247820000  | 3. 666587000  | -0. 290788000 |
| H  | 2. 956995000  | 4. 181457000  | -1. 215793000 |
| H  | 2. 646627000  | 4. 106114000  | 0. 515574000  |
| C  | 2. 932332000  | 2. 179632000  | -0. 423901000 |
| H  | 3. 207881000  | 1. 632777000  | 0. 483262000  |
| H  | 3. 483313000  | 1. 742864000  | -1. 263708000 |
| S  | 1. 143597000  | 1. 927664000  | -0. 779986000 |
| C  | 1. 160722000  | 0. 275245000  | -1. 531485000 |
| C  | -4. 987832000 | 6. 899863000  | -2. 002536000 |
| H  | -5. 993740000 | 7. 284780000  | -2. 200737000 |
| H  | -4. 607210000 | 7. 409918000  | -1. 109473000 |
| H  | -4. 349862000 | 7. 187304000  | -2. 846908000 |
| C  | -5. 004771000 | 5. 385119000  | -1. 810887000 |
| H  | -5. 678473000 | 5. 126198000  | -0. 982153000 |

|   |              |              |              |
|---|--------------|--------------|--------------|
| H | -5.423914000 | 4.905591000  | -2.706626000 |
| C | -3.616559000 | 4.804709000  | -1.531736000 |
| H | -3.196209000 | 5.283439000  | -0.635118000 |
| H | -2.941663000 | 5.061809000  | -2.361266000 |
| C | -3.632282000 | 3.285170000  | -1.337420000 |
| H | -4.052523000 | 2.811196000  | -2.234309000 |
| H | -4.297405000 | 3.022812000  | -0.504430000 |
| C | -2.235162000 | 2.738787000  | -1.059322000 |
| H | -1.822504000 | 3.173658000  | -0.145835000 |
| H | -1.539061000 | 2.975248000  | -1.872138000 |
| S | -2.195553000 | 0.920738000  | -0.796755000 |
| C | -2.363052000 | 0.371298000  | -2.521367000 |
| H | -1.631374000 | 0.870514000  | -3.164968000 |
| H | -2.196928000 | -0.707594000 | -2.545963000 |
| H | -3.370296000 | 0.585929000  | -2.885723000 |
| C | -1.608065000 | -3.729153000 | -1.610782000 |
| S | -2.085593000 | -2.569934000 | -0.295097000 |
| C | -3.886253000 | -2.421698000 | -0.598731000 |
| H | -4.188195000 | -1.514856000 | -0.063932000 |
| H | -4.041970000 | -2.232749000 | -1.668177000 |
| C | 1.795231000  | -1.693880000 | -0.834107000 |
| C | 1.246220000  | -2.137417000 | 0.381497000  |
| C | 3.297941000  | -1.531548000 | -0.930977000 |
| H | 3.675904000  | -1.033365000 | -0.027807000 |
| H | 3.587119000  | -0.908917000 | -1.785736000 |
| C | 3.984469000  | -2.900588000 | -1.074704000 |
| H | 3.574806000  | -3.419999000 | -1.953277000 |
| H | 3.738910000  | -3.524888000 | -0.205902000 |
| C | 5.503646000  | -2.784388000 | -1.215893000 |
| H | 5.743409000  | -2.159531000 | -2.089007000 |
| H | 5.911090000  | -2.256310000 | -0.340818000 |
| C | 6.198826000  | -4.139499000 | -1.357614000 |
| H | 5.791439000  | -4.667906000 | -2.232278000 |
| H | 5.958170000  | -4.765146000 | -0.485365000 |
| C | 7.718344000  | -4.030145000 | -1.496706000 |
| H | 8.124764000  | -3.501484000 | -0.622689000 |
| H | 7.958039000  | -3.405103000 | -2.368708000 |
| C | 8.405045000  | -5.386843000 | -1.637122000 |
| H | 8.213279000  | -6.021785000 | -0.763642000 |
| H | 8.045505000  | -5.924644000 | -2.522772000 |
| H | 9.490417000  | -5.275531000 | -1.734529000 |
| H | 0.421191000  | -2.846762000 | 0.386864000  |
| H | 1.928017000  | -2.240958000 | 1.222466000  |
| H | 0.234350000  | 0.164061000  | -2.104141000 |

|   |              |              |              |
|---|--------------|--------------|--------------|
| H | 1.992101000  | 0.213974000  | -2.230659000 |
| H | -2.764866000 | -1.819390000 | 2.459704000  |
| H | -0.539033000 | -3.932972000 | -1.501898000 |
| H | -1.795940000 | -3.311889000 | -2.605341000 |
| H | 1.316118000  | -2.026288000 | -1.756898000 |
| H | -2.146504000 | -4.673845000 | -1.502515000 |
| C | -4.701628000 | -3.622997000 | -0.127717000 |
| H | -4.356222000 | -4.534170000 | -0.633811000 |
| H | -4.527387000 | -3.777981000 | 0.944721000  |
| C | -6.198884000 | -3.436056000 | -0.391124000 |
| H | -6.547152000 | -2.521450000 | 0.111252000  |
| H | -6.365921000 | -3.276852000 | -1.466753000 |
| C | -7.041375000 | -4.623434000 | 0.080098000  |
| H | -6.692080000 | -5.536633000 | -0.421885000 |
| H | -6.872847000 | -4.782497000 | 1.154348000  |
| C | -8.533942000 | -4.435325000 | -0.181388000 |
| H | -8.737994000 | -4.309404000 | -1.251554000 |
| H | -9.109016000 | -5.300127000 | 0.166259000  |
| H | -8.920378000 | -3.549512000 | 0.337033000  |

112

**TS3',  $E_{(\text{SCF Done})} = -2655.660931$  a.u., IF =  $i1185.0239$  cm<sup>-1</sup>**

|   |              |              |             |
|---|--------------|--------------|-------------|
| C | -1.404868000 | 1.140604000  | 2.743995000 |
| C | -2.268409000 | 0.016181000  | 2.590281000 |
| C | -1.554971000 | -1.144055000 | 3.016289000 |
| C | -0.263080000 | -0.737636000 | 3.450353000 |
| C | -0.161607000 | 0.671137000  | 3.266423000 |
| C | -3.737076000 | 0.039785000  | 2.271485000 |
| H | -4.000171000 | -0.553510000 | 1.389149000 |
| H | -4.098556000 | 1.058444000  | 2.108416000 |
| H | -4.312341000 | -0.363458000 | 3.114612000 |
| C | -2.152255000 | -2.502178000 | 3.238877000 |
| H | -2.529344000 | -2.586101000 | 4.267599000 |
| H | -1.425665000 | -3.311165000 | 3.107125000 |
| H | -3.001570000 | -2.696255000 | 2.577494000 |
| C | 0.712960000  | -1.607409000 | 4.184275000 |
| H | 1.727570000  | -1.199880000 | 4.172315000 |
| H | 0.757353000  | -2.624010000 | 3.780047000 |
| H | 0.414750000  | -1.693777000 | 5.237970000 |
| C | 0.979066000  | 1.532034000  | 3.725842000 |
| H | 0.942396000  | 1.669928000  | 4.814877000 |
| H | 0.942046000  | 2.529192000  | 3.277823000 |
| H | 1.958264000  | 1.095657000  | 3.496898000 |
| C | -1.771048000 | 2.587595000  | 2.572895000 |
| H | -2.660350000 | 2.722196000  | 1.951411000 |

|    |              |              |              |
|----|--------------|--------------|--------------|
| H  | -1.989570000 | 3.043607000  | 3.547734000  |
| H  | -0.966406000 | 3.174925000  | 2.118450000  |
| Sc | -0.385558000 | -0.273562000 | 1.000543000  |
| C  | 1.872744000  | 3.027330000  | 0.285538000  |
| H  | 2.276249000  | 3.009561000  | 1.303712000  |
| S  | 1.537174000  | 1.299630000  | -0.220414000 |
| C  | 3.135428000  | 0.445542000  | -0.015893000 |
| C  | 9.725416000  | -3.286190000 | -2.629674000 |
| H  | 9.304852000  | -3.509856000 | -3.617719000 |
| H  | 10.567239000 | -3.967732000 | -2.465480000 |
| H  | 10.126185000 | -2.265725000 | -2.663988000 |
| C  | 8.671505000  | -3.430266000 | -1.534029000 |
| H  | 8.316002000  | -4.469965000 | -1.500855000 |
| H  | 9.130897000  | -3.235371000 | -0.554526000 |
| C  | 7.475899000  | -2.495236000 | -1.724315000 |
| H  | 7.015200000  | -2.690580000 | -2.704323000 |
| H  | 7.831980000  | -1.454578000 | -1.758802000 |
| C  | 6.416517000  | -2.632321000 | -0.629985000 |
| H  | 6.876747000  | -2.433822000 | 0.349270000  |
| H  | 6.062763000  | -3.673280000 | -0.593435000 |
| C  | 5.218318000  | -1.699789000 | -0.823142000 |
| H  | 4.746940000  | -1.911683000 | -1.794966000 |
| H  | 5.583673000  | -0.664402000 | -0.878385000 |
| C  | 4.174704000  | -1.836867000 | 0.288376000  |
| H  | 4.613327000  | -1.537779000 | 1.252286000  |
| H  | 3.910858000  | -2.898512000 | 0.394187000  |
| C  | 2.862495000  | -1.055921000 | 0.075022000  |
| C  | 1.847901000  | -1.311588000 | 1.198958000  |
| H  | 3.607697000  | 0.802778000  | 0.908086000  |
| H  | 3.771951000  | 0.706448000  | -0.864452000 |
| H  | 2.447868000  | -1.381478000 | -0.895418000 |
| C  | -3.286613000 | -2.735703000 | -0.556191000 |
| H  | -3.428526000 | -2.923303000 | 0.512140000  |
| S  | -1.771178000 | -1.717213000 | -0.771781000 |
| C  | -0.456559000 | -2.569184000 | 0.110351000  |
| H  | 0.884867000  | 3.499596000  | 0.319638000  |
| C  | 2.798021000  | 3.775280000  | -0.669482000 |
| H  | 3.770824000  | 3.268919000  | -0.720425000 |
| H  | 2.374489000  | 3.748506000  | -1.681690000 |
| C  | 3.005721000  | 5.227940000  | -0.229308000 |
| H  | 3.416904000  | 5.247918000  | 0.790606000  |
| H  | 2.032090000  | 5.736998000  | -0.178223000 |
| C  | 3.935236000  | 6.005832000  | -1.163690000 |
| H  | 4.907346000  | 5.495648000  | -1.213802000 |

|   |               |               |               |
|---|---------------|---------------|---------------|
| H | 3. 525099000  | 5. 983090000  | -2. 182990000 |
| C | 4. 139843000  | 7. 454380000  | -0. 726313000 |
| H | 4. 581923000  | 7. 509212000  | 0. 275719000  |
| H | 4. 808484000  | 7. 983893000  | -1. 413180000 |
| H | 3. 189372000  | 8. 000750000  | -0. 700835000 |
| H | -4. 105196000 | -2. 088832000 | -0. 894032000 |
| C | -3. 246572000 | -4. 033681000 | -1. 354318000 |
| H | -2. 390063000 | -4. 637984000 | -1. 027128000 |
| H | -3. 083355000 | -3. 804075000 | -2. 415210000 |
| C | -4. 537655000 | -4. 841634000 | -1. 187815000 |
| H | -5. 395121000 | -4. 232961000 | -1. 510165000 |
| H | -4. 699888000 | -5. 060312000 | -0. 122100000 |
| C | -4. 524335000 | -6. 153421000 | -1. 976201000 |
| H | -3. 666702000 | -6. 760394000 | -1. 653918000 |
| H | -4. 360868000 | -5. 933872000 | -3. 040445000 |
| C | -5. 811656000 | -6. 957757000 | -1. 811087000 |
| H | -5. 772171000 | -7. 889078000 | -2. 385845000 |
| H | -5. 984090000 | -7. 222593000 | -0. 760983000 |
| H | -6. 683225000 | -6. 390041000 | -2. 158316000 |
| C | -7. 634105000 | 3. 978388000  | -2. 557763000 |
| H | -8. 055000000 | 4. 816646000  | -3. 122934000 |
| H | -7. 992390000 | 3. 051777000  | -3. 022233000 |
| H | -8. 046203000 | 4. 022511000  | -1. 542446000 |
| C | -6. 108396000 | 4. 036137000  | -2. 540102000 |
| H | -5. 727728000 | 4. 026424000  | -3. 571036000 |
| H | -5. 780897000 | 4. 989468000  | -2. 102536000 |
| C | -5. 477280000 | 2. 881000000  | -1. 759534000 |
| H | -5. 803108000 | 1. 926273000  | -2. 198332000 |
| H | -5. 857699000 | 2. 889869000  | -0. 727405000 |
| C | -3. 946446000 | 2. 939399000  | -1. 739962000 |
| H | -3. 614833000 | 3. 885075000  | -1. 292290000 |
| H | -3. 574006000 | 2. 932959000  | -2. 772189000 |
| C | -3. 346938000 | 1. 774784000  | -0. 956071000 |
| H | -3. 637555000 | 0. 808743000  | -1. 387263000 |
| H | -3. 702342000 | 1. 788497000  | 0. 077340000  |
| S | -1. 521079000 | 1. 808138000  | -0. 838385000 |
| C | -1. 092664000 | 1. 392056000  | -2. 556834000 |
| H | -1. 437639000 | 2. 183542000  | -3. 225660000 |
| H | -1. 533640000 | 0. 433630000  | -2. 844199000 |
| H | -0. 005060000 | 1. 325206000  | -2. 617581000 |
| H | 0. 603050000  | -1. 872683000 | 0. 635155000  |
| H | 2. 043199000  | -0. 616224000 | 2. 025047000  |
| H | 2. 017024000  | -2. 308085000 | 1. 633551000  |
| H | -0. 862594000 | -3. 184552000 | 0. 917980000  |

H 0.139012000 -3.191461000 -0.564537000

93

**TS2<sup>N</sup>,  $E_{(\text{SCF Done})} = -1790.708887$  a.u., IF =  $i232.3759$  cm<sup>-1</sup>**

|    |              |              |              |
|----|--------------|--------------|--------------|
| C  | -1.018393000 | 0.382508000  | 2.209063000  |
| C  | -0.665029000 | -0.983270000 | 2.420826000  |
| C  | 0.763051000  | -1.067151000 | 2.429070000  |
| C  | 1.284285000  | 0.247243000  | 2.246778000  |
| C  | 0.188968000  | 1.141636000  | 2.086671000  |
| C  | -1.575471000 | -2.058210000 | 2.941911000  |
| H  | -1.232166000 | -3.065877000 | 2.686102000  |
| H  | -2.599830000 | -1.957741000 | 2.576371000  |
| H  | -1.607420000 | -2.002837000 | 4.038254000  |
| C  | 1.552983000  | -2.285051000 | 2.816940000  |
| H  | 1.597656000  | -2.379338000 | 3.910440000  |
| H  | 2.586957000  | -2.239823000 | 2.460971000  |
| H  | 1.113540000  | -3.215552000 | 2.442292000  |
| C  | 2.715744000  | 0.655584000  | 2.415611000  |
| H  | 2.955555000  | 1.566809000  | 1.859892000  |
| H  | 3.419379000  | -0.126747000 | 2.116142000  |
| H  | 2.916797000  | 0.871429000  | 3.474245000  |
| C  | 0.269354000  | 2.638425000  | 2.093574000  |
| H  | 0.442442000  | 3.000705000  | 3.115991000  |
| H  | -0.662863000 | 3.092599000  | 1.748665000  |
| H  | 1.085222000  | 3.032961000  | 1.478020000  |
| C  | -2.398101000 | 0.975133000  | 2.230136000  |
| H  | -2.527860000 | 1.620379000  | 3.108604000  |
| H  | -2.599196000 | 1.588917000  | 1.346972000  |
| H  | -3.166110000 | 0.201088000  | 2.284431000  |
| Sc | 0.060056000  | -0.392788000 | 0.136852000  |
| C  | -6.106492000 | 5.786963000  | -0.535950000 |
| H  | -7.149292000 | 5.767609000  | -0.201887000 |
| H  | -5.567563000 | 6.501526000  | 0.097650000  |
| H  | -6.093281000 | 6.176104000  | -1.560928000 |
| C  | -5.477507000 | 4.397389000  | -0.463525000 |
| H  | -5.539029000 | 4.019581000  | 0.567149000  |
| H  | -6.057804000 | 3.697926000  | -1.081519000 |
| C  | -4.017411000 | 4.380983000  | -0.920909000 |
| H  | -3.433428000 | 5.077511000  | -0.301797000 |
| H  | -3.954665000 | 4.759939000  | -1.950901000 |
| C  | -3.384657000 | 2.986820000  | -0.854043000 |
| H  | -3.962672000 | 2.295893000  | -1.483322000 |
| H  | -3.447895000 | 2.603973000  | 0.172111000  |
| C  | -1.932493000 | 3.004788000  | -1.318138000 |
| H  | -1.293790000 | 3.619850000  | -0.675272000 |

|   |               |               |               |
|---|---------------|---------------|---------------|
| H | -1. 867837000 | 3. 407196000  | -2. 335339000 |
| S | -1. 204454000 | 1. 312267000  | -1. 434328000 |
| C | 0. 563941000  | 1. 373535000  | -1. 186977000 |
| C | 9. 561913580  | 3. 195215170  | -1. 466718710 |
| H | 9. 958628630  | 2. 381582400  | -0. 847365570 |
| H | 10. 161577640 | 4. 089194380  | -1. 264107120 |
| H | 9. 720358750  | 2. 919933130  | -2. 516417910 |
| C | 8. 083157640  | 3. 441945940  | -1. 176525370 |
| H | 7. 960770450  | 3. 750818760  | -0. 128567840 |
| H | 7. 724799400  | 4. 283953770  | -1. 785483400 |
| C | 7. 207240960  | 2. 216992090  | -1. 446537730 |
| H | 7. 562811930  | 1. 374341320  | -0. 834964180 |
| H | 7. 331292580  | 1. 906032870  | -2. 494277040 |
| C | 5. 723931230  | 2. 460609710  | -1. 163218240 |
| H | 5. 367761760  | 3. 296435360  | -1. 782907680 |
| H | 5. 599505260  | 2. 780754810  | -0. 117963320 |
| C | 4. 853028570  | 1. 231047300  | -1. 424420900 |
| H | 5. 191030410  | 0. 394843830  | -0. 797511790 |
| H | 4. 977984020  | 0. 905929640  | -2. 466128260 |
| C | 3. 359180210  | 1. 501436800  | -1. 150387860 |
| H | 3. 027285330  | 2. 333349660  | -1. 782580360 |
| H | 3. 241772460  | 1. 825858550  | -0. 113231400 |
| C | 2. 504616370  | 0. 297620830  | -1. 420303490 |
| C | 2. 486799820  | -0. 941561640 | -0. 695893640 |
| H | 1. 957468830  | -1. 762796810 | -1. 165008530 |
| H | 3. 142900880  | -1. 174858360 | 0. 137931860  |
| N | -1. 233072000 | -2. 368309000 | -1. 008420000 |
| C | -3. 579103000 | -4. 529772000 | -2. 310231000 |
| H | -4. 209805000 | -4. 025874000 | -3. 058165000 |
| H | -4. 094308000 | -5. 457531000 | -2. 047028000 |
| C | -3. 556007000 | -3. 590824000 | -1. 110123000 |
| C | -2. 682367000 | -2. 535941000 | -0. 715296000 |
| C | -3. 221930000 | -1. 435008000 | -0. 039596000 |
| H | -2. 591920000 | -0. 557955000 | 0. 072863000  |
| C | -4. 496322000 | -1. 427944000 | 0. 511982000  |
| H | -4. 851521000 | -0. 569150000 | 1. 073641000  |
| C | -5. 289997000 | -2. 553361000 | 0. 331974000  |
| H | -6. 284305000 | -2. 616735000 | 0. 764623000  |
| C | -4. 826944000 | -3. 567902000 | -0. 492851000 |
| H | -5. 514352000 | -4. 370807000 | -0. 749815000 |
| H | -2. 682522000 | -4. 794648000 | -2. 852056000 |
| C | -1. 108704000 | -2. 192938000 | -2. 480851000 |
| H | -1. 886378000 | -1. 509253000 | -2. 821142000 |
| H | -0. 131390000 | -1. 763475000 | -2. 731982000 |

|   |              |              |              |
|---|--------------|--------------|--------------|
| H | -1.204335000 | -3.145324000 | -3.016453000 |
| C | -0.391201000 | -3.452183000 | -0.490343000 |
| H | -0.059031000 | -3.148055000 | 0.505088000  |
| H | -0.901712000 | -4.418145000 | -0.441513000 |
| H | 0.488833000  | -3.581391000 | -1.124561000 |
| H | 2.620421640  | 0.052392930  | -2.455365040 |
| H | 0.766438650  | 2.217181450  | -0.560753900 |
| H | 0.694381680  | 1.826429640  | -2.147587050 |

94

**TS2<sup>C</sup>,  $E_{(\text{SCF Done})} = -1699.680619$  a.u., IF =  $i258.5404$  cm<sup>-1</sup>**

|    |              |              |              |
|----|--------------|--------------|--------------|
| C  | -2.591462000 | -1.759344000 | 1.582582000  |
| C  | -1.472173000 | -2.624342000 | 1.390653000  |
| C  | -0.395536000 | -2.146389000 | 2.196478000  |
| C  | -0.853296000 | -0.989170000 | 2.892633000  |
| C  | -2.211162000 | -0.755523000 | 2.521545000  |
| C  | -1.522484000 | -3.931921000 | 0.651990000  |
| H  | -0.529055000 | -4.371373000 | 0.525356000  |
| H  | -1.991195000 | -3.855010000 | -0.336290000 |
| H  | -2.115817000 | -4.660395000 | 1.220401000  |
| C  | 0.930347000  | -2.823755000 | 2.386212000  |
| H  | 1.722168000  | -2.117283000 | 2.653068000  |
| H  | 1.257340000  | -3.356992000 | 1.487900000  |
| H  | 0.874356000  | -3.562995000 | 3.196278000  |
| C  | -0.104547000 | -0.226697000 | 3.947447000  |
| H  | -0.245148000 | 0.857618000  | 3.866548000  |
| H  | 0.970325000  | -0.425769000 | 3.914450000  |
| H  | -0.450474000 | -0.517254000 | 4.948152000  |
| C  | -3.121956000 | 0.242185000  | 3.178088000  |
| H  | -3.580169000 | -0.198497000 | 4.073617000  |
| H  | -3.944275000 | 0.559724000  | 2.529589000  |
| H  | -2.589859000 | 1.140409000  | 3.510177000  |
| C  | -3.970026000 | -2.012623000 | 1.043853000  |
| H  | -3.956413000 | -2.366858000 | 0.007145000  |
| H  | -4.476071000 | -2.786832000 | 1.636578000  |
| H  | -4.601975000 | -1.121263000 | 1.083590000  |
| Sc | -0.841305000 | -0.402598000 | 0.506002000  |
| C  | -8.860439000 | 0.967998000  | -2.246282000 |
| H  | -9.486669000 | 0.558935000  | -3.046016000 |
| H  | -9.200419000 | 0.529053000  | -1.300608000 |
| H  | -9.046645000 | 2.047435000  | -2.198073000 |
| C  | -7.383861000 | 0.671008000  | -2.497299000 |
| H  | -7.234778000 | -0.415113000 | -2.576627000 |
| H  | -7.082766000 | 1.093050000  | -3.466120000 |
| C  | -6.471941000 | 1.227018000  | -1.401260000 |



|   |              |              |              |
|---|--------------|--------------|--------------|
| H | -6.771162000 | 0.805814000  | -0.430331000 |
| H | -6.617584000 | 2.313865000  | -1.323242000 |
| C | -4.989760000 | 0.930148000  | -1.653843000 |
| H | -4.689882000 | 1.356954000  | -2.620002000 |
| H | -4.839191000 | -0.155457000 | -1.726441000 |
| C | -4.105638000 | 1.499783000  | -0.548491000 |
| H | -4.341536000 | 1.059986000  | 0.423623000  |
| H | -4.217281000 | 2.586731000  | -0.475614000 |
| S | -2.328856000 | 1.193690000  | -0.933974000 |
| C | -1.339489000 | 1.870734000  | 0.411255000  |
| C | 0.803010000  | 1.654742000  | 0.452289000  |
| C | 1.276174000  | 0.356999000  | 0.752304000  |
| H | 1.826681000  | -0.167300000 | -0.031325000 |
| H | 1.605668000  | 0.146312000  | 1.766133000  |
| H | -1.827989000 | 1.709779000  | 1.386187000  |
| H | -1.165073000 | 2.936391000  | 0.285550000  |
| C | 1.130593000  | 2.282045000  | -0.887312000 |
| H | 0.466765000  | 3.127036000  | -1.103118000 |
| H | 0.968793000  | 1.543575000  | -1.684674000 |
| C | 2.591538000  | 2.768141000  | -0.952420000 |
| H | 2.779118000  | 3.101354000  | -1.982083000 |
| H | 3.267930000  | 1.921988000  | -0.772217000 |
| C | 2.925910000  | 3.909186000  | 0.010488000  |
| H | 2.209907000  | 4.731799000  | -0.136774000 |
| H | 2.801923000  | 3.574523000  | 1.050829000  |
| C | 4.349062000  | 4.440880000  | -0.170271000 |
| H | 4.477784000  | 4.786889000  | -1.206420000 |
| H | 5.065245000  | 3.616980000  | -0.033728000 |
| C | 4.699366000  | 5.579020000  | 0.789782000  |
| H | 4.571496000  | 5.232039000  | 1.825257000  |
| H | 3.982336000  | 6.401047000  | 0.653457000  |
| C | 6.120327000  | 6.105050000  | 0.599998000  |
| H | 6.862429000  | 5.314325000  | 0.764089000  |
| H | 6.268209000  | 6.492673000  | -0.415138000 |
| H | 0.745428000  | 2.350050000  | 1.288585000  |
| H | 6.340713000  | 6.917626000  | 1.300644000  |
| C | -0.493996000 | -1.493103000 | -1.872999000 |
| H | -0.403125000 | -0.562372000 | -2.432895000 |
| H | -1.508242000 | -1.822347000 | -1.634700000 |
| C | 0.552646000  | -2.331130000 | -1.729470000 |
| H | 0.378332000  | -3.295029000 | -1.250211000 |
| C | 1.935352000  | -2.104533000 | -2.248927000 |
| H | 1.990349000  | -2.638509000 | -3.212282000 |
| H | 2.086927000  | -1.043848000 | -2.488567000 |

|   |             |              |              |
|---|-------------|--------------|--------------|
| C | 3.054756000 | -2.636254000 | -1.343798000 |
| H | 2.877278000 | -3.702797000 | -1.143767000 |
| H | 3.019116000 | -2.131282000 | -0.368488000 |
| C | 4.444350000 | -2.459505000 | -1.957856000 |
| H | 4.618414000 | -1.393542000 | -2.166271000 |
| H | 4.476306000 | -2.969351000 | -2.931763000 |
| C | 5.568147000 | -2.992331000 | -1.067962000 |
| H | 5.393757000 | -4.058396000 | -0.860013000 |
| H | 5.535167000 | -2.482596000 | -0.093172000 |
| C | 6.959205000 | -2.818991000 | -1.680548000 |
| H | 7.132671000 | -1.753804000 | -1.889689000 |
| H | 6.991728000 | -3.329032000 | -2.653533000 |
| C | 8.076357000 | -3.352803000 | -0.786868000 |
| H | 7.950414000 | -4.424288000 | -0.589947000 |
| H | 9.057946000 | -3.214638000 | -1.252667000 |
| H | 8.092622000 | -2.837343000 | 0.181191000  |

83

**J1,  $E_{(\text{SCF Done})} = -1940.738969$  a.u.**

|    |              |              |              |
|----|--------------|--------------|--------------|
| C  | -1.585046000 | -2.088063000 | 1.491841000  |
| C  | -0.394271000 | -2.774940000 | 1.106866000  |
| C  | 0.690127000  | -2.224673000 | 1.852585000  |
| C  | 0.172591000  | -1.204135000 | 2.705939000  |
| C  | -1.232940000 | -1.117925000 | 2.478704000  |
| C  | -0.328495000 | -3.958769000 | 0.184857000  |
| H  | 0.648371000  | -4.056138000 | -0.300491000 |
| H  | -1.093408000 | -3.919756000 | -0.598646000 |
| H  | -0.497126000 | -4.890891000 | 0.740598000  |
| C  | 2.111523000  | -2.709332000 | 1.847276000  |
| H  | 2.264514000  | -3.459387000 | 2.634797000  |
| H  | 2.824449000  | -1.900451000 | 2.039495000  |
| H  | 2.387132000  | -3.185347000 | 0.900698000  |
| C  | 0.942575000  | -0.472184000 | 3.764220000  |
| H  | 0.446555000  | 0.456371000  | 4.060896000  |
| H  | 1.956374000  | -0.214748000 | 3.440763000  |
| H  | 1.036365000  | -1.091453000 | 4.666256000  |
| C  | -2.175447000 | -0.218391000 | 3.225274000  |
| H  | -2.372931000 | -0.613948000 | 4.230196000  |
| H  | -3.144350000 | -0.130717000 | 2.724432000  |
| H  | -1.770597000 | 0.791752000  | 3.355403000  |
| C  | -2.973377000 | -2.429651000 | 1.030085000  |
| H  | -3.002590000 | -2.735480000 | -0.021992000 |
| H  | -3.378315000 | -3.267581000 | 1.613019000  |
| H  | -3.667867000 | -1.593343000 | 1.153377000  |
| Sc | -0.136332000 | -0.435735000 | 0.414251000  |

|   |              |              |              |
|---|--------------|--------------|--------------|
| C | -8.345006000 | 0.116988000  | -1.295517000 |
| H | -8.992193000 | -0.503726000 | -1.923886000 |
| H | -8.524902000 | -0.165995000 | -0.251483000 |
| H | -8.664036000 | 1.158777000  | -1.417613000 |
| C | -6.876398000 | -0.060526000 | -1.673860000 |
| H | -6.596523000 | -1.119179000 | -1.576426000 |
| H | -6.735128000 | 0.197740000  | -2.732562000 |
| C | -5.935812000 | 0.791153000  | -0.818361000 |
| H | -6.076121000 | 0.535137000  | 0.242000000  |
| H | -6.213146000 | 1.850323000  | -0.917563000 |
| C | -4.461910000 | 0.615516000  | -1.198343000 |
| H | -4.318134000 | 0.875240000  | -2.255045000 |
| H | -4.181373000 | -0.441161000 | -1.090477000 |
| C | -3.552225000 | 1.486755000  | -0.338201000 |
| H | -3.662650000 | 1.265211000  | 0.727672000  |
| H | -3.778876000 | 2.547490000  | -0.492027000 |
| S | -1.788112000 | 1.288262000  | -0.812612000 |
| C | -0.984865000 | 2.785234000  | -0.097804000 |
| C | 2.696755000  | 3.952642000  | 0.356384000  |
| H | 3.077393000  | 3.200346000  | 1.062313000  |
| H | 3.044837000  | 3.658659000  | -0.643622000 |
| C | 1.162483000  | 3.941983000  | 0.390120000  |
| H | 0.799087000  | 4.719536000  | -0.297007000 |
| H | 0.816691000  | 4.224588000  | 1.395602000  |
| C | 0.532596000  | 2.584135000  | 0.010183000  |
| C | 0.854852000  | 1.435807000  | 0.986294000  |
| H | 0.904573000  | 2.329605000  | -0.996402000 |
| H | 1.943572000  | 1.257557000  | 1.013332000  |
| H | 0.587013000  | 1.753290000  | 2.007044000  |
| C | 7.462892000  | -1.966097000 | -0.986539000 |
| H | 8.295106000  | -1.437246000 | -0.510531000 |
| H | 7.360541000  | -2.939083000 | -0.491288000 |
| H | 7.741294000  | -2.151544000 | -2.030634000 |
| C | 6.171813000  | -1.156318000 | -0.892893000 |
| H | 5.939121000  | -0.955148000 | 0.162528000  |
| H | 6.316785000  | -0.175673000 | -1.366825000 |
| C | 4.981131000  | -1.860462000 | -1.547386000 |
| H | 4.832775000  | -2.841947000 | -1.074034000 |
| H | 5.212262000  | -2.059808000 | -2.603506000 |
| C | 3.686390000  | -1.046138000 | -1.457709000 |
| H | 3.831292000  | -0.068269000 | -1.934519000 |
| H | 3.450504000  | -0.851489000 | -0.402278000 |
| C | 2.521401000  | -1.768391000 | -2.127313000 |
| H | 2.324705000  | -2.739952000 | -1.662724000 |

|   |              |              |              |
|---|--------------|--------------|--------------|
| H | 2.728022000  | -1.931419000 | -3.190944000 |
| S | 0.994915000  | -0.751171000 | -2.063754000 |
| C | -0.142342000 | -1.705384000 | -3.114910000 |
| H | -0.292462000 | -2.717197000 | -2.731734000 |
| H | -1.094670000 | -1.169422000 | -3.139777000 |
| H | 0.262224000  | -1.744417000 | -4.129592000 |
| H | -1.245754000 | 3.626649000  | -0.747726000 |
| H | -1.421470000 | 2.953700000  | 0.893799000  |
| C | 3.263978000  | 5.296514000  | 0.712145000  |
| H | 3.034945000  | 5.659075000  | 1.716054000  |
| C | 3.999752000  | 6.055948000  | -0.099259000 |
| H | 4.254442000  | 5.736141000  | -1.108418000 |
| H | 4.381443000  | 7.023925000  | 0.214015000  |

62

**K1,  $E_{(\text{SCF Done})} = -1305.593224$  a.u.**

|    |              |              |              |
|----|--------------|--------------|--------------|
| C  | 0.593943000  | -1.959296000 | 1.228821000  |
| C  | 0.197775000  | -2.312701000 | -0.097082000 |
| C  | 1.368854000  | -2.339530000 | -0.913115000 |
| C  | 2.485645000  | -2.002687000 | -0.091725000 |
| C  | 2.009265000  | -1.768757000 | 1.234835000  |
| C  | -1.179259000 | -2.715846000 | -0.543059000 |
| H  | -1.960342000 | -2.310166000 | 0.106933000  |
| H  | -1.283993000 | -3.808754000 | -0.520684000 |
| H  | -1.397573000 | -2.401000000 | -1.569965000 |
| C  | 1.411301000  | -2.758461000 | -2.355739000 |
| H  | 1.374092000  | -3.852558000 | -2.439294000 |
| H  | 2.331653000  | -2.437832000 | -2.854040000 |
| H  | 0.563722000  | -2.371862000 | -2.934425000 |
| C  | 3.928517000  | -2.008048000 | -0.509257000 |
| H  | 4.527843000  | -1.296130000 | 0.067974000  |
| H  | 4.059765000  | -1.777939000 | -1.572021000 |
| H  | 4.371898000  | -2.998974000 | -0.345003000 |
| C  | 2.858894000  | -1.529911000 | 2.447418000  |
| H  | 3.162676000  | -2.484819000 | 2.896378000  |
| H  | 2.326675000  | -0.965765000 | 3.219131000  |
| H  | 3.774377000  | -0.979372000 | 2.210112000  |
| C  | -0.296961000 | -1.892519000 | 2.435874000  |
| H  | -0.266339000 | -2.839874000 | 2.990073000  |
| H  | 0.009660000  | -1.106519000 | 3.134497000  |
| H  | -1.343878000 | -1.716541000 | 2.168713000  |
| Sc | 1.050371000  | -0.031567000 | -0.160414000 |
| C  | -7.271256000 | -0.710888000 | -0.217715000 |
| H  | -7.943024000 | -1.144117000 | -0.965984000 |
| H  | -7.159045000 | -1.442464000 | 0.591400000  |

|   |              |              |              |
|---|--------------|--------------|--------------|
| H | -7.765993000 | 0.173969000  | 0.199737000  |
| C | -5.920987000 | -0.352015000 | -0.833640000 |
| H | -5.467134000 | -1.250535000 | -1.275281000 |
| H | -6.069873000 | 0.354601000  | -1.661763000 |
| C | -4.950099000 | 0.258158000  | 0.179956000  |
| H | -4.800145000 | -0.446779000 | 1.010744000  |
| H | -5.401992000 | 1.158932000  | 0.619293000  |
| C | -3.595445000 | 0.620193000  | -0.438164000 |
| H | -3.741310000 | 1.327037000  | -1.264841000 |
| H | -3.138512000 | -0.280592000 | -0.869808000 |
| C | -2.657660000 | 1.238625000  | 0.593199000  |
| H | -2.480499000 | 0.568536000  | 1.440239000  |
| H | -3.073284000 | 2.176330000  | 0.977617000  |
| S | -1.042072000 | 1.688970000  | -0.160988000 |
| C | -0.317466000 | 2.860212000  | 1.074316000  |
| C | 1.669851000  | 3.464007000  | -0.374603000 |
| H | 0.933728000  | 3.253308000  | -1.163491000 |
| H | 1.684189000  | 4.556385000  | -0.287944000 |
| C | 1.212584000  | 2.858629000  | 0.981069000  |
| C | 1.761102000  | 1.451564000  | 1.286885000  |
| H | -0.642905000 | 2.526449000  | 2.064988000  |
| H | -0.747991000 | 3.846932000  | 0.873354000  |
| C | 3.047510000  | 2.987271000  | -0.842014000 |
| C | 3.088932000  | 1.597659000  | -1.411627000 |
| C | 2.158612000  | 1.022890000  | -2.209248000 |
| H | 3.779334000  | 3.072370000  | -0.031711000 |
| H | 3.410234000  | 3.654306000  | -1.639319000 |
| H | 3.996944000  | 1.025801000  | -1.213403000 |
| H | 1.542576000  | 3.558162000  | 1.766367000  |
| H | 1.344888000  | 1.123128000  | 2.256166000  |
| H | 2.847471000  | 1.486759000  | 1.449880000  |
| H | 2.365805000  | 0.073490000  | -2.702386000 |
| H | 1.269741000  | 1.564190000  | -2.540035000 |

62

**TS-1,  $E_{(\text{SCF Done})} = -1305.583617$  a.u., IF =  $i268.7241$  cm<sup>-1</sup>**

|   |              |              |              |
|---|--------------|--------------|--------------|
| C | 0.343494000  | -1.988306000 | 1.056844000  |
| C | 0.249505000  | -2.335036000 | -0.324831000 |
| C | 1.569888000  | -2.344042000 | -0.870607000 |
| C | 2.478884000  | -2.004230000 | 0.174263000  |
| C | 1.725111000  | -1.781379000 | 1.364400000  |
| C | -0.991028000 | -2.743978000 | -1.068207000 |
| H | -1.903924000 | -2.418923000 | -0.560733000 |
| H | -1.044904000 | -3.837684000 | -1.149227000 |
| H | -1.017302000 | -2.353293000 | -2.092337000 |

|    |               |               |               |
|----|---------------|---------------|---------------|
| C  | 1. 930277000  | -2. 787890000 | -2. 258679000 |
| H  | 1. 943784000  | -3. 884239000 | -2. 318079000 |
| H  | 2. 924931000  | -2. 443526000 | -2. 557582000 |
| H  | 1. 215508000  | -2. 437230000 | -3. 011514000 |
| C  | 3. 976099000  | -1. 988026000 | 0. 068286000  |
| H  | 4. 435585000  | -1. 332441000 | 0. 814970000  |
| H  | 4. 322546000  | -1. 667539000 | -0. 920105000 |
| H  | 4. 383736000  | -2. 993690000 | 0. 235495000  |
| C  | 2. 289539000  | -1. 526610000 | 2. 733103000  |
| H  | 2. 521730000  | -2. 474822000 | 3. 235341000  |
| H  | 1. 586357000  | -0. 990197000 | 3. 379296000  |
| H  | 3. 218128000  | -0. 947577000 | 2. 700054000  |
| C  | -0. 782447000 | -1. 969975000 | 2. 051679000  |
| H  | -0. 834638000 | -2. 924026000 | 2. 592672000  |
| H  | -0. 661036000 | -1. 186813000 | 2. 808983000  |
| H  | -1. 755206000 | -1. 825552000 | 1. 571448000  |
| Sc | 1. 055041000  | -0. 043917000 | -0. 208315000 |
| C  | -7. 241318000 | -0. 690096000 | -0. 146715000 |
| H  | -7. 913208000 | -1. 163817000 | -0. 869854000 |
| H  | -7. 133176000 | -1. 373696000 | 0. 703832000  |
| H  | -7. 733629000 | 0. 219345000  | 0. 217354000  |
| C  | -5. 888817000 | -0. 372491000 | -0. 780127000 |
| H  | -5. 437616000 | -1. 296706000 | -1. 168144000 |
| H  | -6. 033745000 | 0. 285384000  | -1. 648101000 |
| C  | -4. 917555000 | 0. 292210000  | 0. 198250000  |
| H  | -4. 770113000 | -0. 364182000 | 1. 068293000  |
| H  | -5. 367638000 | 1. 217916000  | 0. 584372000  |
| C  | -3. 561617000 | 0. 615448000  | -0. 438507000 |
| H  | -3. 705923000 | 1. 274875000  | -1. 303740000 |
| H  | -3. 106190000 | -0. 308733000 | -0. 819346000 |
| C  | -2. 623203000 | 1. 287666000  | 0. 558005000  |
| H  | -2. 438090000 | 0. 658483000  | 1. 433995000  |
| H  | -3. 043153000 | 2. 240397000  | 0. 898635000  |
| S  | -1. 015339000 | 1. 712562000  | -0. 227735000 |
| C  | -0. 289671000 | 2. 895153000  | 0. 986250000  |
| C  | 1. 655020000  | 3. 579203000  | -0. 532668000 |
| H  | 0. 938448000  | 3. 293601000  | -1. 316342000 |
| H  | 1. 664210000  | 4. 673940000  | -0. 506835000 |
| C  | 1. 230254000  | 2. 985814000  | 0. 829465000  |
| C  | 1. 933403000  | 1. 632191000  | 1. 020622000  |
| H  | -0. 559424000 | 2. 548665000  | 1. 989607000  |
| H  | -0. 762890000 | 3. 867307000  | 0. 813961000  |
| C  | 3. 029121000  | 3. 018464000  | -0. 876685000 |
| C  | 3. 010379000  | 1. 502555000  | -0. 899795000 |

|   |             |              |              |
|---|-------------|--------------|--------------|
| C | 2.343965000 | 0.750587000  | -1.891026000 |
| H | 3.768077000 | 3.371249000  | -0.147653000 |
| H | 3.359741000 | 3.367459000  | -1.862549000 |
| H | 3.888782000 | 1.025464000  | -0.465618000 |
| H | 1.562303000 | 3.676480000  | 1.618360000  |
| H | 1.337139000 | 0.961635000  | 1.697292000  |
| H | 2.885450000 | 1.739153000  | 1.544543000  |
| H | 2.854027000 | -0.116601000 | -2.304179000 |
| H | 1.685183000 | 1.277816000  | -2.588109000 |

62

**M1,  $E_{(\text{SCF Done})} = -1305.605231$  a.u.**

|    |              |              |              |
|----|--------------|--------------|--------------|
| C  | 0.092081000  | -2.189301000 | 0.898552000  |
| C  | 0.218491000  | -2.525819000 | -0.483275000 |
| C  | 1.607371000  | -2.482907000 | -0.827697000 |
| C  | 2.335021000  | -2.106078000 | 0.335018000  |
| C  | 1.400538000  | -1.913292000 | 1.401431000  |
| C  | -0.890959000 | -2.954338000 | -1.403367000 |
| H  | -1.870751000 | -2.598897000 | -1.068531000 |
| H  | -0.949948000 | -4.049709000 | -1.449134000 |
| H  | -0.740518000 | -2.606464000 | -2.431881000 |
| C  | 2.190267000  | -2.870594000 | -2.154092000 |
| H  | 2.344910000  | -3.956753000 | -2.201749000 |
| H  | 3.159305000  | -2.395442000 | -2.328699000 |
| H  | 1.535399000  | -2.604070000 | -2.990306000 |
| C  | 3.828132000  | -2.014862000 | 0.444227000  |
| H  | 4.145601000  | -1.321402000 | 1.229675000  |
| H  | 4.287928000  | -1.691388000 | -0.494514000 |
| H  | 4.255486000  | -2.995007000 | 0.693715000  |
| C  | 1.742748000  | -1.620936000 | 2.836098000  |
| H  | 1.864124000  | -2.555337000 | 3.399598000  |
| H  | 0.961066000  | -1.045748000 | 3.345124000  |
| H  | 2.682563000  | -1.068337000 | 2.934077000  |
| C  | -1.170510000 | -2.219320000 | 1.712302000  |
| H  | -1.304382000 | -3.205383000 | 2.176609000  |
| H  | -1.158659000 | -1.488204000 | 2.528384000  |
| H  | -2.062769000 | -2.033443000 | 1.105773000  |
| Sc | 0.893358000  | -0.232817000 | -0.269215000 |
| C  | -7.164931000 | -0.429147000 | -0.105051000 |
| H  | -7.830696000 | -0.954703000 | -0.797307000 |
| H  | -7.097011000 | -1.028607000 | 0.810595000  |
| H  | -7.641443000 | 0.523380000  | 0.154796000  |
| C  | -5.788760000 | -0.208188000 | -0.728494000 |
| H  | -5.353460000 | -1.176908000 | -1.012556000 |
| H  | -5.893863000 | 0.365319000  | -1.659720000 |

|   |              |              |              |
|---|--------------|--------------|--------------|
| C | -4.824915000 | 0.524584000  | 0.207684000  |
| H | -4.715386000 | -0.047714000 | 1.140328000  |
| H | -5.259658000 | 1.493813000  | 0.490377000  |
| C | -3.446157000 | 0.754131000  | -0.420440000 |
| H | -3.553315000 | 1.331633000  | -1.347494000 |
| H | -3.007155000 | -0.214042000 | -0.701104000 |
| C | -2.511666000 | 1.493040000  | 0.532233000  |
| H | -2.352695000 | 0.934592000  | 1.460355000  |
| H | -2.920402000 | 2.477080000  | 0.786286000  |
| S | -0.886967000 | 1.817571000  | -0.265587000 |
| C | -0.104011000 | 2.982787000  | 0.931019000  |
| C | 1.842019000  | 3.692398000  | -0.644378000 |
| H | 1.129486000  | 3.404039000  | -1.428924000 |
| H | 1.885373000  | 4.785699000  | -0.644006000 |
| C | 1.402800000  | 3.129931000  | 0.726276000  |
| C | 2.232065000  | 1.823679000  | 0.899685000  |
| H | -0.326564000 | 2.618799000  | 1.940448000  |
| H | -0.604385000 | 3.947185000  | 0.795545000  |
| C | 3.200746000  | 3.037168000  | -0.903834000 |
| C | 3.009364000  | 1.572150000  | -0.449209000 |
| C | 2.339356000  | 0.681264000  | -1.522139000 |
| H | 3.972248000  | 3.523488000  | -0.290745000 |
| H | 3.518202000  | 3.099636000  | -1.948595000 |
| H | 3.969684000  | 1.110971000  | -0.196728000 |
| H | 1.716722000  | 3.832569000  | 1.508841000  |
| H | 1.628834000  | 1.001645000  | 1.358350000  |
| H | 2.986216000  | 1.968601000  | 1.680552000  |
| H | 3.094160000  | 0.198251000  | -2.146070000 |
| H | 1.702183000  | 1.290791000  | -2.193755000 |

83

**K1',  $E_{(\text{SCF Done})} = -1940.740914$  a.u.**

|   |              |              |             |
|---|--------------|--------------|-------------|
| C | -1.059259000 | 1.465139000  | 2.124806000 |
| C | -0.566799000 | 0.142371000  | 2.335027000 |
| C | 0.858303000  | 0.198146000  | 2.337321000 |
| C | 1.245829000  | 1.547780000  | 2.095824000 |
| C | 0.058091000  | 2.331559000  | 1.964348000 |
| C | -1.394905000 | -1.064792000 | 2.671986000 |
| H | -2.413908000 | -0.983007000 | 2.282575000 |
| H | -1.477563000 | -1.187864000 | 3.760410000 |
| H | -0.960824000 | -1.992065000 | 2.281527000 |
| C | 1.770089000  | -0.925720000 | 2.730264000 |
| H | 1.899985000  | -0.946183000 | 3.821027000 |
| H | 2.768638000  | -0.824993000 | 2.294475000 |
| H | 1.369856000  | -1.902866000 | 2.441186000 |



|    |              |              |              |
|----|--------------|--------------|--------------|
| C  | 2.643535000  | 2.092620000  | 2.179167000  |
| H  | 2.793826000  | 2.964727000  | 1.533443000  |
| H  | 3.400321000  | 1.345291000  | 1.917228000  |
| H  | 2.866395000  | 2.419469000  | 3.203649000  |
| C  | 0.007581000  | 3.826165000  | 1.847437000  |
| H  | 0.011449000  | 4.289760000  | 2.843037000  |
| H  | -0.893758000 | 4.171051000  | 1.332929000  |
| H  | 0.871891000  | 4.228889000  | 1.308665000  |
| C  | -2.496021000 | 1.887013000  | 2.207659000  |
| H  | -2.812124000 | 1.954788000  | 3.257177000  |
| H  | -2.660263000 | 2.870028000  | 1.758298000  |
| H  | -3.171462000 | 1.180680000  | 1.714305000  |
| Sc | 0.090227000  | 0.757916000  | 0.060791000  |
| C  | -7.869515000 | -2.284396000 | 0.859515000  |
| H  | -8.684132000 | -1.809329000 | 1.416091000  |
| H  | -8.280792000 | -2.639347000 | -0.092855000 |
| H  | -7.545297000 | -3.162911000 | 1.430045000  |
| C  | -6.714702000 | -1.310765000 | 0.635882000  |
| H  | -7.078345000 | -0.426873000 | 0.093401000  |
| H  | -6.348310000 | -0.945520000 | 1.605731000  |
| C  | -5.553015000 | -1.935379000 | -0.140427000 |
| H  | -5.919177000 | -2.298816000 | -1.111367000 |
| H  | -5.187588000 | -2.820565000 | 0.400395000  |
| C  | -4.393105000 | -0.958704000 | -0.366407000 |
| H  | -4.014591000 | -0.602749000 | 0.599390000  |
| H  | -4.767280000 | -0.077829000 | -0.902755000 |
| C  | -3.261871000 | -1.614097000 | -1.148226000 |
| H  | -3.614024000 | -1.985381000 | -2.117250000 |
| H  | -2.863785000 | -2.475747000 | -0.600689000 |
| S  | -1.785461000 | -0.583026000 | -1.511077000 |
| C  | -2.432139000 | 0.799508000  | -2.532465000 |
| C  | -0.186770000 | 1.694794000  | -3.313050000 |
| H  | 0.210478000  | 0.688600000  | -3.105072000 |
| H  | -0.445561000 | 1.697430000  | -4.379476000 |
| C  | -1.445434000 | 1.968541000  | -2.470974000 |
| C  | -1.125945000 | 2.295841000  | -1.006658000 |
| H  | -3.395425000 | 1.103350000  | -2.113402000 |
| H  | -2.587447000 | 0.426514000  | -3.550445000 |
| C  | 0.920650000  | 2.729801000  | -3.061665000 |
| C  | 1.604990000  | 2.584244000  | -1.726660000 |
| C  | 2.278687000  | 1.485971000  | -1.323959000 |
| H  | 0.508154000  | 3.740201000  | -3.158263000 |
| H  | 1.687574000  | 2.629479000  | -3.841183000 |
| H  | -1.971317000 | 2.813043000  | -2.948502000 |

|   |              |              |              |
|---|--------------|--------------|--------------|
| C | 8.018210000  | -1.772654000 | 0.223645000  |
| H | 8.853400000  | -1.075000000 | 0.102056000  |
| H | 7.990761000  | -2.078295000 | 1.276360000  |
| H | 8.239810000  | -2.663557000 | -0.375710000 |
| C | 6.699093000  | -1.132686000 | -0.203004000 |
| H | 6.523471000  | -0.223290000 | 0.389528000  |
| H | 6.769783000  | -0.807096000 | -1.250287000 |
| C | 5.503990000  | -2.075627000 | -0.048147000 |
| H | 5.428993000  | -2.399995000 | 0.999941000  |
| H | 5.680063000  | -2.985587000 | -0.639216000 |
| C | 4.179419000  | -1.439104000 | -0.483164000 |
| H | 4.250639000  | -1.132684000 | -1.535064000 |
| H | 4.006973000  | -0.528191000 | 0.105006000  |
| C | 3.013507000  | -2.402970000 | -0.303555000 |
| H | 2.890853000  | -2.679060000 | 0.748238000  |
| H | 3.195337000  | -3.319818000 | -0.876050000 |
| S | 1.413516000  | -1.753122000 | -0.935368000 |
| C | 0.405755000  | -3.244111000 | -0.689579000 |
| H | 0.262539000  | -3.467113000 | 0.371079000  |
| H | -0.558067000 | -3.078042000 | -1.173038000 |
| H | 0.897068000  | -4.088465000 | -1.181013000 |
| H | 2.880881000  | 1.501680000  | -0.418849000 |
| H | 1.611283000  | 3.455964000  | -1.072757000 |
| H | 2.391633000  | 0.626515000  | -1.982353000 |
| H | -0.734449000 | 3.319359000  | -0.927699000 |
| H | -2.069710000 | 2.312605000  | -0.437053000 |

83

**TS-1',  $E_{(\text{SCF Done})} = -1940.732017$  a.u.,  $\text{IF} = i280.4899$  cm<sup>-1</sup>**

|   |              |              |             |
|---|--------------|--------------|-------------|
| C | -1.078098000 | 1.369642000  | 2.116684000 |
| C | -0.697267000 | 0.005990000  | 2.277085000 |
| C | 0.726997000  | -0.044565000 | 2.359038000 |
| C | 1.225875000  | 1.283099000  | 2.231881000 |
| C | 0.109553000  | 2.156738000  | 2.066040000 |
| C | -1.621114000 | -1.156998000 | 2.500372000 |
| H | -2.613393000 | -0.982539000 | 2.073994000 |
| H | -1.763086000 | -1.340320000 | 3.574160000 |
| H | -1.230501000 | -2.087144000 | 2.072013000 |
| C | 1.532534000  | -1.252098000 | 2.736474000 |
| H | 1.548727000  | -1.373624000 | 3.828300000 |
| H | 2.573682000  | -1.169506000 | 2.411428000 |
| H | 1.118548000  | -2.177221000 | 2.321796000 |
| C | 2.647143000  | 1.709971000  | 2.453895000 |
| H | 2.878300000  | 2.660535000  | 1.962284000 |
| H | 3.368939000  | 0.966476000  | 2.099474000 |

|    |              |              |              |
|----|--------------|--------------|--------------|
| H  | 2.839367000  | 1.854606000  | 3.525488000  |
| C  | 0.166833000  | 3.656257000  | 2.033656000  |
| H  | 0.105970000  | 4.067521000  | 3.050186000  |
| H  | -0.660211000 | 4.092470000  | 1.464368000  |
| H  | 1.101900000  | 4.025647000  | 1.599997000  |
| C  | -2.478264000 | 1.908613000  | 2.166959000  |
| H  | -2.780964000 | 2.081280000  | 3.208486000  |
| H  | -2.574248000 | 2.866691000  | 1.646477000  |
| H  | -3.210681000 | 1.219553000  | 1.734486000  |
| Sc | 0.154734000  | 0.685359000  | 0.070559000  |
| C  | -7.763453000 | -2.112555000 | 0.939085000  |
| H  | -8.629986000 | -1.584639000 | 1.350635000  |
| H  | -8.117141000 | -2.733850000 | 0.107843000  |
| H  | -7.382585000 | -2.783893000 | 1.717968000  |
| C  | -6.688894000 | -1.130347000 | 0.478437000  |
| H  | -7.110623000 | -0.450291000 | -0.274764000 |
| H  | -6.381244000 | -0.498378000 | 1.323619000  |
| C  | -5.458476000 | -1.828117000 | -0.105750000 |
| H  | -5.765953000 | -2.454675000 | -0.955224000 |
| H  | -5.036718000 | -2.513304000 | 0.643992000  |
| C  | -4.375983000 | -0.843552000 | -0.564820000 |
| H  | -4.038944000 | -0.238129000 | 0.285597000  |
| H  | -4.815948000 | -0.151393000 | -1.293153000 |
| C  | -3.192703000 | -1.576998000 | -1.182601000 |
| H  | -3.495497000 | -2.112659000 | -2.088708000 |
| H  | -2.795652000 | -2.321299000 | -0.483291000 |
| S  | -1.714192000 | -0.582590000 | -1.645089000 |
| C  | -2.379476000 | 0.856244000  | -2.563132000 |
| C  | -0.114935000 | 1.779872000  | -3.351369000 |
| H  | 0.268332000  | 0.758758000  | -3.197283000 |
| H  | -0.312751000 | 1.882608000  | -4.424681000 |
| C  | -1.381363000 | 2.015266000  | -2.512300000 |
| C  | -0.961432000 | 2.354037000  | -1.076909000 |
| H  | -3.319141000 | 1.153840000  | -2.090402000 |
| H  | -2.584785000 | 0.544121000  | -3.592214000 |
| C  | 0.922079000  | 2.790556000  | -2.872152000 |
| C  | 1.235299000  | 2.601281000  | -1.399274000 |
| C  | 2.045151000  | 1.552933000  | -0.941210000 |
| H  | 0.546165000  | 3.806275000  | -3.046027000 |
| H  | 1.857037000  | 2.692313000  | -3.436537000 |
| H  | -1.909667000 | 2.874342000  | -2.953211000 |
| C  | 8.017310000  | -1.492204000 | 0.104889000  |
| H  | 8.820062000  | -0.757181000 | -0.015470000 |
| H  | 8.015601000  | -1.814021000 | 1.153182000  |

|   |              |              |              |
|---|--------------|--------------|--------------|
| H | 8.270397000  | -2.363946000 | -0.510057000 |
| C | 6.666686000  | -0.904335000 | -0.297406000 |
| H | 6.458329000  | -0.012159000 | 0.310334000  |
| H | 6.710745000  | -0.560628000 | -1.340316000 |
| C | 5.515379000  | -1.900533000 | -0.144002000 |
| H | 5.467773000  | -2.244129000 | 0.899687000  |
| H | 5.724054000  | -2.792909000 | -0.751288000 |
| C | 4.159742000  | -1.314543000 | -0.553256000 |
| H | 4.205493000  | -0.985564000 | -1.599777000 |
| H | 3.949845000  | -0.423315000 | 0.051309000  |
| C | 3.040545000  | -2.334136000 | -0.383841000 |
| H | 2.943621000  | -2.645007000 | 0.660887000  |
| H | 3.251600000  | -3.226349000 | -0.984738000 |
| S | 1.407153000  | -1.734643000 | -0.975315000 |
| C | 0.462357000  | -3.272592000 | -0.771803000 |
| H | 0.353884000  | -3.547491000 | 0.280793000  |
| H | -0.520251000 | -3.126647000 | -1.224035000 |
| H | 0.971426000  | -4.076306000 | -1.311082000 |
| H | 2.729467000  | 1.745559000  | -0.119883000 |
| H | 1.230020000  | 3.504524000  | -0.793143000 |
| H | 2.380396000  | 0.816488000  | -1.672415000 |
| H | -0.991210000 | 3.428415000  | -0.885235000 |
| H | -1.677455000 | 1.928125000  | -0.339166000 |

83

**L1,  $E_{(\text{SCF Done})} = -1940.761514$  a.u.**

|   |              |              |             |
|---|--------------|--------------|-------------|
| C | -0.950769000 | -0.503778000 | 2.567699000 |
| C | -0.875804000 | -1.748363000 | 1.874007000 |
| C | 0.498363000  | -2.112931000 | 1.772956000 |
| C | 1.273283000  | -1.091573000 | 2.399411000 |
| C | 0.381183000  | -0.099830000 | 2.897975000 |
| C | -2.038521000 | -2.603007000 | 1.456786000 |
| H | -2.965654000 | -2.026655000 | 1.390760000 |
| H | -2.213490000 | -3.401738000 | 2.190057000 |
| H | -1.879994000 | -3.094891000 | 0.489521000 |
| C | 1.013912000  | -3.433519000 | 1.279553000 |
| H | 1.106767000  | -4.141640000 | 2.114068000 |
| H | 2.006496000  | -3.356958000 | 0.824151000 |
| H | 0.338505000  | -3.895144000 | 0.552164000 |
| C | 2.760713000  | -1.111190000 | 2.597753000 |
| H | 3.186866000  | -0.103190000 | 2.608150000 |
| H | 3.274635000  | -1.683616000 | 1.818303000 |
| H | 3.017321000  | -1.580081000 | 3.557237000 |
| C | 0.767798000  | 1.067451000  | 3.756118000 |
| H | 0.791296000  | 0.772619000  | 4.813963000 |

|    |              |              |              |
|----|--------------|--------------|--------------|
| H  | 0.063069000  | 1.899454000  | 3.669573000  |
| H  | 1.761150000  | 1.448401000  | 3.502092000  |
| C  | -2.215329000 | 0.170793000  | 3.021028000  |
| H  | -2.603226000 | -0.312923000 | 3.927317000  |
| H  | -2.052692000 | 1.223705000  | 3.268498000  |
| H  | -3.010832000 | 0.125497000  | 2.269250000  |
| Sc | 0.202026000  | -0.046998000 | 0.461785000  |
| C  | -7.737465000 | -1.836755000 | -1.217914000 |
| H  | -8.593388000 | -1.887457000 | -0.536935000 |
| H  | -8.094066000 | -1.424732000 | -2.169284000 |
| H  | -7.400500000 | -2.863335000 | -1.405098000 |
| C  | -6.616611000 | -0.982847000 | -0.629687000 |
| H  | -6.994774000 | 0.027639000  | -0.421071000 |
| H  | -6.306104000 | -1.399615000 | 0.338965000  |
| C  | -5.398792000 | -0.884180000 | -1.551402000 |
| H  | -5.708887000 | -0.462440000 | -2.518213000 |
| H  | -5.020327000 | -1.894677000 | -1.764788000 |
| C  | -4.271293000 | -0.029920000 | -0.960728000 |
| H  | -3.939282000 | -0.459551000 | -0.007363000 |
| H  | -4.661374000 | 0.971000000  | -0.739082000 |
| C  | -3.089497000 | 0.068270000  | -1.917415000 |
| H  | -3.381427000 | 0.541963000  | -2.861481000 |
| H  | -2.708263000 | -0.928182000 | -2.168276000 |
| S  | -1.611522000 | 0.986451000  | -1.330504000 |
| C  | -2.292785000 | 2.657387000  | -0.958063000 |
| C  | -0.051429000 | 3.956555000  | -1.263946000 |
| H  | 0.195207000  | 3.108474000  | -1.916797000 |
| H  | -0.246809000 | 4.811923000  | -1.918845000 |
| C  | -1.264744000 | 3.619430000  | -0.367658000 |
| C  | -0.661610000 | 3.162858000  | 0.989233000  |
| H  | -3.128428000 | 2.527946000  | -0.264272000 |
| H  | -2.681764000 | 3.033688000  | -1.910813000 |
| C  | 1.088094000  | 4.204525000  | -0.268389000 |
| C  | 0.876462000  | 3.115753000  | 0.804848000  |
| C  | 1.423134000  | 1.738909000  | 0.379811000  |
| H  | 0.977800000  | 5.202181000  | 0.179300000  |
| H  | 2.080493000  | 4.158623000  | -0.729021000 |
| H  | -1.836374000 | 4.542118000  | -0.199834000 |
| C  | 7.914242000  | -0.359474000 | -1.176085000 |
| H  | 8.601599000  | 0.474035000  | -0.997660000 |
| H  | 8.077905000  | -1.100510000 | -0.384510000 |
| H  | 8.195119000  | -0.823088000 | -2.129148000 |
| C  | 6.464157000  | 0.118232000  | -1.198484000 |
| H  | 6.223571000  | 0.610137000  | -0.245340000 |

|   |              |              |              |
|---|--------------|--------------|--------------|
| H | 6.340180000  | 0.883026000  | -1.977681000 |
| C | 5.468714000  | -1.017462000 | -1.445661000 |
| H | 5.589082000  | -1.783085000 | -0.665258000 |
| H | 5.708502000  | -1.509792000 | -2.399016000 |
| C | 4.013941000  | -0.536883000 | -1.473931000 |
| H | 3.890261000  | 0.219514000  | -2.259630000 |
| H | 3.771868000  | -0.046416000 | -0.522284000 |
| C | 3.050788000  | -1.692051000 | -1.724671000 |
| H | 3.113308000  | -2.448379000 | -0.935756000 |
| H | 3.274117000  | -2.177383000 | -2.681677000 |
| S | 1.313835000  | -1.111813000 | -1.864926000 |
| C | 0.487483000  | -2.636100000 | -2.411735000 |
| H | 0.622714000  | -3.447555000 | -1.693890000 |
| H | -0.577538000 | -2.421163000 | -2.527952000 |
| H | 0.889606000  | -2.927347000 | -3.385735000 |
| H | 2.450861000  | 1.615270000  | 0.750799000  |
| H | 1.362085000  | 3.398564000  | 1.744994000  |
| H | 1.517038000  | 1.705947000  | -0.730443000 |
| H | -0.924237000 | 3.886795000  | 1.769778000  |
| H | -1.083253000 | 2.203963000  | 1.329149000  |

68

**J2,  $E_{(\text{SCF Done})} = -1744.257941$  a.u.**

|    |              |              |              |
|----|--------------|--------------|--------------|
| C  | -1.698925000 | -1.867532000 | 1.816418000  |
| C  | -0.702422000 | -2.745818000 | 1.322024000  |
| C  | 0.534133000  | -2.376967000 | 1.910227000  |
| C  | 0.301713000  | -1.274699000 | 2.773554000  |
| C  | -1.076647000 | -0.960577000 | 2.713060000  |
| Sc | -0.136657000 | -0.487075000 | 0.509502000  |
| C  | -8.231764000 | -0.973923000 | -0.088430000 |
| H  | -8.856586000 | -1.754435000 | -0.534784000 |
| H  | -8.234179000 | -1.126597000 | 0.997385000  |
| H  | -8.711382000 | -0.008948000 | -0.290182000 |
| C  | -6.813371000 | -1.016127000 | -0.652175000 |
| H  | -6.373029000 | -2.006327000 | -0.466871000 |
| H  | -6.847076000 | -0.894749000 | -1.743769000 |
| C  | -5.905284000 | 0.060658000  | -0.053814000 |
| H  | -5.870337000 | -0.057733000 | 1.038955000  |
| H  | -6.343004000 | 1.051228000  | -0.242030000 |
| C  | -4.481971000 | 0.020633000  | -0.620190000 |
| H  | -4.513521000 | 0.145561000  | -1.710239000 |
| H  | -4.040336000 | -0.967638000 | -0.428133000 |
| C  | -3.604586000 | 1.109159000  | -0.011177000 |
| H  | -3.540146000 | 1.018425000  | 1.077802000  |
| H  | -3.997105000 | 2.102685000  | -0.252867000 |

|   |              |              |              |
|---|--------------|--------------|--------------|
| S | -1.905015000 | 1.060621000  | -0.710646000 |
| C | -1.135702000 | 2.630423000  | -0.118336000 |
| C | 2.519565000  | 3.948692000  | 0.105377000  |
| H | 2.952472000  | 3.263421000  | 0.848444000  |
| H | 2.841387000  | 3.594186000  | -0.883701000 |
| C | 0.988797000  | 3.891435000  | 0.199353000  |
| H | 0.573137000  | 4.603970000  | -0.527259000 |
| H | 0.669458000  | 4.234323000  | 1.194596000  |
| C | 0.392034000  | 2.490786000  | -0.058005000 |
| C | 0.793233000  | 1.425979000  | 0.982770000  |
| H | 0.736633000  | 2.177536000  | -1.058987000 |
| H | 1.888414000  | 1.291215000  | 0.984645000  |
| H | 0.538122000  | 1.790852000  | 1.990701000  |
| C | 7.087856000  | -2.893415000 | 0.479420000  |
| H | 7.894731000  | -2.390366000 | 1.022155000  |
| H | 6.791447000  | -3.772360000 | 1.064159000  |
| H | 7.499568000  | -3.249470000 | -0.472225000 |
| C | 5.907388000  | -1.951445000 | 0.254513000  |
| H | 5.540687000  | -1.582884000 | 1.223242000  |
| H | 6.243181000  | -1.066382000 | -0.303292000 |
| C | 4.755266000  | -2.616142000 | -0.502376000 |
| H | 4.415699000  | -3.501871000 | 0.054107000  |
| H | 5.120255000  | -2.983061000 | -1.472079000 |
| C | 3.572117000  | -1.670220000 | -0.733942000 |
| H | 3.907796000  | -0.791427000 | -1.299549000 |
| H | 3.207097000  | -1.300688000 | 0.235933000  |
| C | 2.440082000  | -2.360969000 | -1.488281000 |
| H | 2.047386000  | -3.219680000 | -0.933547000 |
| H | 2.781681000  | -2.707968000 | -2.469547000 |
| S | 1.063142000  | -1.189908000 | -1.813402000 |
| C | -0.114922000 | -2.227702000 | -2.735077000 |
| H | -0.418706000 | -3.103435000 | -2.156594000 |
| H | -0.987670000 | -1.611395000 | -2.965568000 |
| H | 0.349947000  | -2.540823000 | -3.673383000 |
| H | -1.454372000 | 3.420928000  | -0.804715000 |
| H | -1.542245000 | 2.839670000  | 0.878070000  |
| C | 3.050533000  | 5.333283000  | 0.341603000  |
| H | 2.846049000  | 5.760155000  | 1.325235000  |
| C | 3.728383000  | 6.054609000  | -0.550864000 |
| H | 3.957348000  | 5.670083000  | -1.543436000 |
| H | 4.086889000  | 7.054775000  | -0.323124000 |
| H | -2.755329000 | -1.903019000 | 1.576049000  |
| H | -1.567552000 | -0.161896000 | 3.257716000  |
| H | 1.045447000  | -0.761701000 | 3.371198000  |

|   |              |              |             |
|---|--------------|--------------|-------------|
| H | 1.487655000  | -2.869024000 | 1.752712000 |
| H | -0.863180000 | -3.568701000 | 0.634085000 |

47

**K2,  $E_{(\text{SCF Done})} = -1109.111856$  a.u.**

|    |              |              |              |
|----|--------------|--------------|--------------|
| C  | -0.072790000 | 2.337334000  | 1.349632000  |
| C  | 0.397882000  | 2.592815000  | 0.034900000  |
| C  | -0.697728000 | 3.048787000  | -0.739976000 |
| C  | -1.843362000 | 3.073181000  | 0.095833000  |
| C  | -1.457120000 | 2.636474000  | 1.389858000  |
| Sc | -1.195091000 | 0.728402000  | -0.085539000 |
| C  | 6.884158000  | 0.140274000  | -0.183765000 |
| H  | 7.595269000  | 0.579270000  | -0.891088000 |
| H  | 6.883332000  | 0.764802000  | 0.717491000  |
| H  | 7.263210000  | -0.849426000 | 0.096808000  |
| C  | 5.488573000  | 0.046118000  | -0.796002000 |
| H  | 5.151779000  | 1.047406000  | -1.100153000 |
| H  | 5.528685000  | -0.556098000 | -1.714133000 |
| C  | 4.461696000  | -0.563255000 | 0.161416000  |
| H  | 4.418927000  | 0.037909000  | 1.081232000  |
| H  | 4.796236000  | -1.565813000 | 0.463450000  |
| C  | 3.061440000  | -0.660769000 | -0.453981000 |
| H  | 3.099361000  | -1.267242000 | -1.367879000 |
| H  | 2.723668000  | 0.341289000  | -0.753210000 |
| C  | 2.064534000  | -1.275473000 | 0.522121000  |
| H  | 1.983720000  | -0.692362000 | 1.444952000  |
| H  | 2.357431000  | -2.298267000 | 0.781777000  |
| S  | 0.394914000  | -1.416370000 | -0.239257000 |
| C  | -0.551957000 | -2.431828000 | 0.987364000  |
| C  | -2.713613000 | -2.382993000 | -0.329190000 |
| H  | -2.013637000 | -2.272048000 | -1.170848000 |
| H  | -2.968548000 | -3.448739000 | -0.315938000 |
| C  | -2.026973000 | -2.013207000 | 1.012202000  |
| C  | -2.149971000 | -0.530489000 | 1.413902000  |
| H  | -0.087380000 | -2.263772000 | 1.964286000  |
| H  | -0.418478000 | -3.482053000 | 0.708628000  |
| C  | -3.979333000 | -1.571720000 | -0.626689000 |
| C  | -3.738780000 | -0.164964000 | -1.097943000 |
| C  | -2.799876000 | 0.235078000  | -1.988542000 |
| H  | -4.640060000 | -1.558816000 | 0.246356000  |
| H  | -4.548918000 | -2.070513000 | -1.425507000 |
| H  | -4.433558000 | 0.592644000  | -0.730857000 |
| H  | -2.489336000 | -2.643183000 | 1.789344000  |
| H  | -1.582797000 | -0.369400000 | 2.347256000  |
| H  | -3.189300000 | -0.280689000 | 1.670271000  |



|   |              |              |              |
|---|--------------|--------------|--------------|
| H | -2.815679000 | 1.248538000  | -2.389068000 |
| H | -2.138976000 | -0.479340000 | -2.486062000 |
| H | 1.420233000  | 2.485858000  | -0.309776000 |
| H | -0.660502000 | 3.344151000  | -1.783261000 |
| H | -2.838038000 | 3.392893000  | -0.195881000 |
| H | -2.102347000 | 2.552736000  | 2.255739000  |
| H | 0.523257000  | 1.983570000  | 2.183658000  |

47

**TS-2,  $E_{(\text{SCF Done})} = -1109.102797$  a.u., IF =  $i259.0755$  cm<sup>-1</sup>**

|    |              |              |              |
|----|--------------|--------------|--------------|
| C  | 0.456402000  | 2.267937000  | 0.937489000  |
| C  | 0.386869000  | 2.619960000  | -0.436235000 |
| C  | -0.908454000 | 3.134139000  | -0.694042000 |
| C  | -1.640319000 | 3.098775000  | 0.520449000  |
| C  | -0.797646000 | 2.569654000  | 1.529515000  |
| Sc | -1.188477000 | 0.775494000  | -0.083960000 |
| C  | 6.825185000  | -0.000931000 | -0.101335000 |
| H  | 7.546688000  | 0.478468000  | -0.770838000 |
| H  | 6.835626000  | 0.549110000  | 0.847152000  |
| H  | 7.182854000  | -1.017759000 | 0.098748000  |
| C  | 5.429305000  | -0.015935000 | -0.719898000 |
| H  | 5.114241000  | 1.013437000  | -0.942440000 |
| H  | 5.458675000  | -0.543185000 | -1.683397000 |
| C  | 4.387844000  | -0.678630000 | 0.184943000  |
| H  | 4.355279000  | -0.151909000 | 1.149791000  |
| H  | 4.700942000  | -1.708766000 | 0.406317000  |
| C  | 2.987616000  | -0.697555000 | -0.438232000 |
| H  | 3.016274000  | -1.233040000 | -1.395817000 |
| H  | 2.671693000  | 0.331360000  | -0.658858000 |
| C  | 1.974870000  | -1.363236000 | 0.486804000  |
| H  | 1.891939000  | -0.839813000 | 1.444785000  |
| H  | 2.253613000  | -2.404322000 | 0.681748000  |
| S  | 0.311031000  | -1.432012000 | -0.296509000 |
| C  | -0.655362000 | -2.450046000 | 0.901951000  |
| C  | -2.812725000 | -2.427091000 | -0.480943000 |
| H  | -2.106152000 | -2.271045000 | -1.310000000 |
| H  | -3.112987000 | -3.479146000 | -0.526685000 |
| C  | -2.143109000 | -2.088986000 | 0.869485000  |
| C  | -2.410427000 | -0.607808000 | 1.188137000  |
| H  | -0.231709000 | -2.272884000 | 1.896155000  |
| H  | -0.497860000 | -3.500756000 | 0.639131000  |
| C  | -4.008123000 | -1.497450000 | -0.655281000 |
| C  | -3.582913000 | -0.043047000 | -0.593009000 |
| C  | -2.833963000 | 0.587452000  | -1.611082000 |
| H  | -4.753999000 | -1.701481000 | 0.121662000  |

|   |              |              |              |
|---|--------------|--------------|--------------|
| H | -4.497769000 | -1.665809000 | -1.622055000 |
| H | -4.248562000 | 0.611183000  | -0.030229000 |
| H | -2.611619000 | -2.712010000 | 1.645079000  |
| H | -1.587623000 | -0.173198000 | 1.822588000  |
| H | -3.302064000 | -0.476636000 | 1.804017000  |
| H | -3.114583000 | 1.598936000  | -1.896882000 |
| H | -2.436685000 | -0.030691000 | -2.422907000 |
| H | 1.189984000  | 2.532206000  | -1.160233000 |
| H | -1.267703000 | 3.507425000  | -1.645532000 |
| H | -2.663340000 | 3.432142000  | 0.657282000  |
| H | -1.058607000 | 2.439273000  | 2.573964000  |
| H | 1.324686000  | 1.872523000  | 1.452460000  |

47

**L2,  $E_{(\text{SCF Done})} = -1109.122476$  a.u.**

|    |              |              |              |
|----|--------------|--------------|--------------|
| C  | 0.549962000  | 2.550648000  | 0.726022000  |
| C  | 0.210013000  | 2.961784000  | -0.590656000 |
| C  | -1.171796000 | 3.289344000  | -0.610045000 |
| C  | -1.686975000 | 3.063119000  | 0.688463000  |
| C  | -0.625830000 | 2.608014000  | 1.515551000  |
| Sc | -0.987659000 | 0.903305000  | -0.202337000 |
| C  | 6.813507000  | -0.121059000 | -0.064936000 |
| H  | 7.540139000  | 0.354798000  | -0.731343000 |
| H  | 6.834772000  | 0.418353000  | 0.889441000  |
| H  | 7.156516000  | -1.145209000 | 0.122916000  |
| C  | 5.415970000  | -0.108681000 | -0.679819000 |
| H  | 5.115761000  | 0.927594000  | -0.890938000 |
| H  | 5.435009000  | -0.626307000 | -1.648751000 |
| C  | 4.367287000  | -0.765376000 | 0.221068000  |
| H  | 4.343693000  | -0.248126000 | 1.191257000  |
| H  | 4.665937000  | -1.802056000 | 0.431224000  |
| C  | 2.965685000  | -0.759556000 | -0.399072000 |
| H  | 2.985930000  | -1.285824000 | -1.362003000 |
| H  | 2.664826000  | 0.277065000  | -0.610064000 |
| C  | 1.944044000  | -1.419710000 | 0.521422000  |
| H  | 1.866631000  | -0.900247000 | 1.482276000  |
| H  | 2.210794000  | -2.464799000 | 0.711241000  |
| S  | 0.284223000  | -1.458052000 | -0.272292000 |
| C  | -0.720240000 | -2.401749000 | 0.955062000  |
| C  | -2.855375000 | -2.555752000 | -0.526682000 |
| H  | -2.133799000 | -2.439272000 | -1.347030000 |
| H  | -3.172008000 | -3.602886000 | -0.532224000 |
| C  | -2.221441000 | -2.148217000 | 0.821300000  |
| C  | -2.675718000 | -0.673170000 | 1.035320000  |
| H  | -0.364663000 | -2.121408000 | 1.952906000  |

|   |              |              |              |
|---|--------------|--------------|--------------|
| H | -0.495858000 | -3.461202000 | 0.796098000  |
| C | -4.017257000 | -1.577231000 | -0.708076000 |
| C | -3.438167000 | -0.208586000 | -0.278120000 |
| C | -2.649170000 | 0.493418000  | -1.412481000 |
| H | -4.847642000 | -1.856246000 | -0.045129000 |
| H | -4.403554000 | -1.547482000 | -1.730538000 |
| H | -4.231418000 | 0.477358000  | 0.034766000  |
| H | -2.673669000 | -2.754119000 | 1.616772000  |
| H | -1.869895000 | -0.046007000 | 1.497284000  |
| H | -3.417927000 | -0.631436000 | 1.839070000  |
| H | -3.293876000 | 1.174246000  | -1.969302000 |
| H | -2.237954000 | -0.247146000 | -2.126117000 |
| H | 0.893376000  | 3.042355000  | -1.430173000 |
| H | -1.731887000 | 3.645028000  | -1.465387000 |
| H | -2.714440000 | 3.217635000  | 0.998814000  |
| H | -0.695712000 | 2.376724000  | 2.573202000  |
| H | 1.537194000  | 2.264616000  | 1.071540000  |

68

**K2',  $E_{(\text{SCF Done})} = -1744.265904$  a.u.**

|    |              |              |              |
|----|--------------|--------------|--------------|
| C  | -1.023995000 | -0.689305000 | 2.433684000  |
| C  | -0.252713000 | -1.629309000 | 1.706664000  |
| C  | 1.113246000  | -1.288090000 | 1.867317000  |
| C  | 1.182669000  | -0.133439000 | 2.685269000  |
| C  | -0.140120000 | 0.237401000  | 3.034498000  |
| Sc | 0.054514000  | 0.551088000  | 0.611824000  |
| C  | -7.067740000 | -3.064315000 | 0.592573000  |
| H  | -7.552984000 | -3.324129000 | 1.539127000  |
| H  | -7.812678000 | -2.562027000 | -0.035762000 |
| H  | -6.788472000 | -4.000245000 | 0.094290000  |
| C  | -5.848803000 | -2.174586000 | 0.825254000  |
| H  | -6.155391000 | -1.262161000 | 1.355921000  |
| H  | -5.138230000 | -2.690429000 | 1.486775000  |
| C  | -5.139080000 | -1.787146000 | -0.474207000 |
| H  | -5.849770000 | -1.273787000 | -1.137582000 |
| H  | -4.827894000 | -2.698687000 | -1.004944000 |
| C  | -3.919321000 | -0.888418000 | -0.242284000 |
| H  | -3.206414000 | -1.395028000 | 0.420651000  |
| H  | -4.236427000 | 0.026227000  | 0.276100000  |
| C  | -3.224596000 | -0.537823000 | -1.551207000 |
| H  | -3.918207000 | -0.081185000 | -2.266359000 |
| H  | -2.819340000 | -1.434424000 | -2.032715000 |
| S  | -1.801566000 | 0.620213000  | -1.442243000 |
| C  | -2.601259000 | 2.241096000  | -1.085584000 |
| C  | -0.469109000 | 3.606992000  | -0.969272000 |

|   |              |              |              |
|---|--------------|--------------|--------------|
| H | -0.017841000 | 2.802737000  | -1.573598000 |
| H | -0.787056000 | 4.372229000  | -1.688282000 |
| C | -1.688940000 | 3.081271000  | -0.190301000 |
| C | -1.296210000 | 2.267219000  | 1.047190000  |
| H | -3.545827000 | 2.031830000  | -0.574516000 |
| H | -2.817274000 | 2.721764000  | -2.045291000 |
| C | 0.609353000  | 4.195230000  | -0.046811000 |
| C | 1.375248000  | 3.160479000  | 0.737057000  |
| C | 2.117565000  | 2.172876000  | 0.189140000  |
| H | 0.153208000  | 4.917194000  | 0.639186000  |
| H | 1.333125000  | 4.754725000  | -0.654125000 |
| H | -2.290840000 | 3.959994000  | 0.097351000  |
| C | 7.694107000  | -1.951480000 | 0.422921000  |
| H | 8.509921000  | -1.408266000 | 0.911033000  |
| H | 7.464404000  | -2.829533000 | 1.038160000  |
| H | 8.065936000  | -2.310317000 | -0.544003000 |
| C | 6.466863000  | -1.059986000 | 0.247805000  |
| H | 6.140662000  | -0.687384000 | 1.229539000  |
| H | 6.737078000  | -0.173514000 | -0.342879000 |
| C | 5.300999000  | -1.781749000 | -0.431425000 |
| H | 5.026145000  | -2.666879000 | 0.160504000  |
| H | 5.626698000  | -2.156630000 | -1.412025000 |
| C | 4.070960000  | -0.886228000 | -0.616106000 |
| H | 4.340879000  | -0.014502000 | -1.226680000 |
| H | 3.752953000  | -0.505744000 | 0.363791000  |
| C | 2.924058000  | -1.640366000 | -1.278230000 |
| H | 2.586376000  | -2.478597000 | -0.658500000 |
| H | 3.248778000  | -2.045477000 | -2.243388000 |
| S | 1.480031000  | -0.571169000 | -1.660285000 |
| C | 0.464238000  | -1.780408000 | -2.560257000 |
| H | 0.112070000  | -2.581400000 | -1.904562000 |
| H | -0.382319000 | -1.245673000 | -2.994846000 |
| H | 1.060925000  | -2.203602000 | -3.372915000 |
| H | 2.775023000  | 1.563729000  | 0.805905000  |
| H | 1.387793000  | 3.264965000  | 1.821925000  |
| H | 2.230955000  | 2.081995000  | -0.890411000 |
| H | -0.974277000 | 2.933859000  | 1.859206000  |
| H | -2.193786000 | 1.761378000  | 1.444317000  |
| H | -0.637416000 | -2.474019000 | 1.145737000  |
| H | 1.957134000  | -1.831268000 | 1.461646000  |
| H | 2.089541000  | 0.361439000  | 3.014627000  |
| H | -0.427690000 | 1.075826000  | 3.656163000  |
| H | -2.104230000 | -0.672022000 | 2.511451000  |

**TS-2',  $E_{(\text{SCF Done})} = -1744.256503$  a.u.,  $\text{IF} = i278.4026$  cm<sup>-1</sup>**

|    |              |              |              |
|----|--------------|--------------|--------------|
| C  | -1.060526000 | -0.675982000 | 2.428101000  |
| C  | -0.397313000 | -1.673631000 | 1.674275000  |
| C  | 0.998852000  | -1.468149000 | 1.814320000  |
| C  | 1.196420000  | -0.342715000 | 2.648055000  |
| C  | -0.076997000 | 0.154667000  | 3.020009000  |
| Sc | 0.112262000  | 0.485482000  | 0.589952000  |
| C  | -7.069887000 | -2.924716000 | 0.610733000  |
| H  | -7.556813000 | -3.165416000 | 1.561420000  |
| H  | -7.810169000 | -2.424153000 | -0.024401000 |
| H  | -6.800658000 | -3.870756000 | 0.126300000  |
| C  | -5.841642000 | -2.044274000 | 0.829444000  |
| H  | -6.138566000 | -1.120992000 | 1.346776000  |
| H  | -5.135862000 | -2.557673000 | 1.497938000  |
| C  | -5.129396000 | -1.683553000 | -0.476300000 |
| H  | -5.835126000 | -1.172385000 | -1.146532000 |
| H  | -4.828282000 | -2.605919000 | -0.993805000 |
| C  | -3.899237000 | -0.794938000 | -0.258864000 |
| H  | -3.190271000 | -1.300178000 | 0.408820000  |
| H  | -4.208565000 | 0.128591000  | 0.249022000  |
| C  | -3.205603000 | -0.469031000 | -1.574427000 |
| H  | -3.894997000 | -0.007729000 | -2.290685000 |
| H  | -2.820972000 | -1.378293000 | -2.048844000 |
| S  | -1.756381000 | 0.660983000  | -1.494564000 |
| C  | -2.535274000 | 2.278636000  | -1.105196000 |
| C  | -0.380395000 | 3.666764000  | -1.029561000 |
| H  | 0.047844000  | 2.871632000  | -1.661010000 |
| H  | -0.644896000 | 4.491266000  | -1.701276000 |
| C  | -1.602312000 | 3.143121000  | -0.256729000 |
| C  | -1.109853000 | 2.402218000  | 0.991047000  |
| H  | -3.463255000 | 2.072645000  | -0.563259000 |
| H  | -2.785361000 | 2.764581000  | -2.053632000 |
| C  | 0.646458000  | 4.095291000  | 0.012967000  |
| C  | 1.049957000  | 2.926527000  | 0.892846000  |
| C  | 1.908612000  | 1.913783000  | 0.433900000  |
| H  | 0.226172000  | 4.899793000  | 0.628538000  |
| H  | 1.550627000  | 4.492509000  | -0.463309000 |
| H  | -2.199477000 | 4.016957000  | 0.044846000  |
| C  | 7.729005000  | -1.689032000 | 0.375755000  |
| H  | 8.515230000  | -1.101833000 | 0.861610000  |
| H  | 7.557794000  | -2.584229000 | 0.985401000  |
| H  | 8.113128000  | -2.017402000 | -0.597220000 |
| C  | 6.448950000  | -0.871596000 | 0.218268000  |
| H  | 6.109515000  | -0.526643000 | 1.205536000  |

|   |              |              |              |
|---|--------------|--------------|--------------|
| H | 6.660106000  | 0.034134000  | -0.367201000 |
| C | 5.322254000  | -1.656427000 | -0.457131000 |
| H | 5.106393000  | -2.560993000 | 0.130014000  |
| H | 5.661741000  | -2.003831000 | -1.443292000 |
| C | 4.039632000  | -0.834331000 | -0.623155000 |
| H | 4.251784000  | 0.057631000  | -1.227145000 |
| H | 3.702568000  | -0.481303000 | 0.359671000  |
| C | 2.936099000  | -1.650756000 | -1.284213000 |
| H | 2.654282000  | -2.512053000 | -0.668177000 |
| H | 3.273731000  | -2.028670000 | -2.256087000 |
| S | 1.426858000  | -0.668096000 | -1.642953000 |
| C | 0.436503000  | -1.957527000 | -2.455124000 |
| H | 0.142022000  | -2.744838000 | -1.755782000 |
| H | -0.447921000 | -1.480977000 | -2.882807000 |
| H | 1.021135000  | -2.389308000 | -3.272108000 |
| H | 2.654789000  | 1.521519000  | 1.119289000  |
| H | 1.073630000  | 3.122539000  | 1.963105000  |
| H | 2.203203000  | 1.931776000  | -0.617221000 |
| H | -1.170531000 | 3.019160000  | 1.889892000  |
| H | -1.763859000 | 1.529369000  | 1.221359000  |
| H | -0.871131000 | -2.470569000 | 1.111776000  |
| H | 1.778693000  | -2.083462000 | 1.384013000  |
| H | 2.152025000  | 0.052953000  | 2.969076000  |
| H | -0.267733000 | 1.004101000  | 3.664973000  |
| H | -2.132950000 | -0.568939000 | 2.541604000  |

68

**M2,  $E_{(\text{SCF Done})} = -1744.283619$  a.u.**

|    |              |              |              |
|----|--------------|--------------|--------------|
| C  | -1.290137000 | -0.352239000 | 2.674956000  |
| C  | -0.944467000 | -1.636537000 | 2.186794000  |
| C  | 0.456209000  | -1.797793000 | 2.341856000  |
| C  | 0.973439000  | -0.616596000 | 2.930384000  |
| C  | -0.102564000 | 0.276090000  | 3.134251000  |
| Sc | 0.124993000  | 0.014401000  | 0.708271000  |
| C  | -7.291791000 | -2.369164000 | -0.256606000 |
| H  | -7.944500000 | -2.590168000 | 0.594215000  |
| H  | -7.883061000 | -1.812353000 | -0.992971000 |
| H  | -7.005555000 | -3.324225000 | -0.712927000 |
| C  | -6.064746000 | -1.574188000 | 0.183825000  |
| H  | -6.385339000 | -0.640674000 | 0.667157000  |
| H  | -5.513819000 | -2.141403000 | 0.947761000  |
| C  | -5.123656000 | -1.242904000 | -0.976744000 |
| H  | -5.674058000 | -0.675220000 | -1.740422000 |
| H  | -4.801180000 | -2.175648000 | -1.462263000 |
| C  | -3.892696000 | -0.442298000 | -0.537589000 |

|   |              |              |              |
|---|--------------|--------------|--------------|
| H | -3.337055000 | -1.004381000 | 0.225315000  |
| H | -4.220681000 | 0.490900000  | -0.061351000 |
| C | -2.972134000 | -0.136281000 | -1.712629000 |
| H | -3.497984000 | 0.409704000  | -2.504235000 |
| H | -2.590853000 | -1.056211000 | -2.169960000 |
| S | -1.470404000 | 0.854795000  | -1.343436000 |
| C | -2.180577000 | 2.534471000  | -1.060635000 |
| C | 0.071352000  | 3.832078000  | -1.266117000 |
| H | 0.362248000  | 2.965822000  | -1.876007000 |
| H | -0.086286000 | 4.664533000  | -1.959220000 |
| C | -1.194057000 | 3.517213000  | -0.435716000 |
| C | -0.671444000 | 3.097633000  | 0.964311000  |
| H | -3.059761000 | 2.416158000  | -0.419571000 |
| H | -2.510220000 | 2.881814000  | -2.045693000 |
| C | 1.146235000  | 4.118853000  | -0.211191000 |
| C | 0.879268000  | 3.060030000  | 0.879525000  |
| C | 1.469826000  | 1.678230000  | 0.535488000  |
| H | 1.001828000  | 5.127682000  | 0.199961000  |
| H | 2.165128000  | 4.067785000  | -0.608511000 |
| H | -1.773938000 | 4.443337000  | -0.326003000 |
| C | 7.800910000  | -0.858152000 | -0.376694000 |
| H | 8.523836000  | -0.051730000 | -0.537916000 |
| H | 7.869039000  | -1.160113000 | 0.675268000  |
| H | 8.114042000  | -1.711927000 | -0.989163000 |
| C | 6.386514000  | -0.408092000 | -0.734925000 |
| H | 6.115218000  | 0.469611000  | -0.131333000 |
| H | 6.358608000  | -0.079877000 | -1.783181000 |
| C | 5.343030000  | -1.507481000 | -0.523865000 |
| H | 5.368540000  | -1.836771000 | 0.525184000  |
| H | 5.611875000  | -2.385067000 | -1.129074000 |
| C | 3.923875000  | -1.055719000 | -0.885115000 |
| H | 3.893190000  | -0.735545000 | -1.934528000 |
| H | 3.653429000  | -0.181817000 | -0.278462000 |
| C | 2.912451000  | -2.175825000 | -0.666802000 |
| H | 2.892119000  | -2.504094000 | 0.377753000  |
| H | 3.151977000  | -3.040775000 | -1.295647000 |
| S | 1.217369000  | -1.663039000 | -1.161978000 |
| C | 0.336221000  | -3.252771000 | -1.082619000 |
| H | 0.395695000  | -3.697092000 | -0.086445000 |
| H | -0.710417000 | -3.073271000 | -1.340140000 |
| H | 0.765260000  | -3.932815000 | -1.823237000 |
| H | 2.481460000  | 1.584051000  | 0.950614000  |
| H | 1.300648000  | 3.373498000  | 1.841176000  |
| H | 1.591017000  | 1.580719000  | -0.568579000 |

|   |              |              |             |
|---|--------------|--------------|-------------|
| H | -0.983970000 | 3.833097000  | 1.714704000 |
| H | -1.125633000 | 2.150682000  | 1.306803000 |
| H | -1.632440000 | -2.374907000 | 1.789822000 |
| H | 1.026685000  | -2.685746000 | 2.095285000 |
| H | 2.010868000  | -0.424356000 | 3.176448000 |
| H | -0.029274000 | 1.267577000  | 3.564114000 |
| H | -2.289343000 | 0.067355000  | 2.713333000 |

83

**J3,  $E_{(\text{SCF Done})} = -1932.296067$  a.u.**

|   |              |              |              |
|---|--------------|--------------|--------------|
| C | -1.638633000 | -2.286509000 | 1.372006000  |
| C | -0.383960000 | -2.916083000 | 1.105274000  |
| C | 0.605971000  | -2.282519000 | 1.915334000  |
| C | -0.032815000 | -1.264986000 | 2.687470000  |
| C | -1.420777000 | -1.267020000 | 2.348694000  |
| C | -0.184060000 | -4.132290000 | 0.244721000  |
| H | 0.836076000  | -4.202687000 | -0.148728000 |
| H | -0.875819000 | -4.161110000 | -0.605284000 |
| H | -0.361145000 | -5.049724000 | 0.822179000  |
| C | 2.044248000  | -2.698401000 | 2.047491000  |
| H | 2.163894000  | -3.419546000 | 2.867272000  |
| H | 2.701234000  | -1.851562000 | 2.274492000  |
| H | 2.423698000  | -3.185722000 | 1.142646000  |
| C | 0.601496000  | -0.477256000 | 3.795899000  |
| H | 0.062882000  | 0.453518000  | 3.997477000  |
| H | 1.641148000  | -0.212669000 | 3.577612000  |
| H | 0.602676000  | -1.058725000 | 4.727777000  |
| C | -2.475774000 | -0.429955000 | 3.016046000  |
| H | -2.751184000 | -0.858268000 | 3.989001000  |
| H | -3.395336000 | -0.373707000 | 2.424469000  |
| H | -2.135407000 | 0.594350000  | 3.206812000  |
| C | -2.966217000 | -2.728873000 | 0.821671000  |
| H | -2.905583000 | -3.044860000 | -0.227054000 |
| H | -3.351790000 | -3.589122000 | 1.385170000  |
| H | -3.724894000 | -1.942678000 | 0.887897000  |
| C | -8.371285000 | 0.342654000  | -1.174387000 |
| H | -9.023177000 | -0.334237000 | -1.736395000 |
| H | -8.538164000 | 0.155037000  | -0.106971000 |
| H | -8.695562000 | 1.368205000  | -1.386628000 |
| C | -6.906302000 | 0.135984000  | -1.552077000 |
| H | -6.621482000 | -0.908966000 | -1.362447000 |
| H | -6.778088000 | 0.297824000  | -2.631418000 |
| C | -5.959373000 | 1.064195000  | -0.788212000 |
| H | -6.086043000 | 0.904809000  | 0.292569000  |
| H | -6.241557000 | 2.109131000  | -0.979885000 |



|   |              |              |              |
|---|--------------|--------------|--------------|
| C | -4.489162000 | 0.860044000  | -1.167979000 |
| H | -4.359370000 | 1.027868000  | -2.245095000 |
| H | -4.204614000 | -0.183854000 | -0.972857000 |
| C | -3.571263000 | 1.801304000  | -0.394618000 |
| H | -3.654624000 | 1.650212000  | 0.686438000  |
| H | -3.814942000 | 2.845738000  | -0.617027000 |
| S | -1.818966000 | 1.575824000  | -0.890953000 |
| C | -0.950946000 | 2.967272000  | -0.049460000 |
| C | 2.768351000  | 4.003192000  | 0.411632000  |
| H | 3.135037000  | 3.211112000  | 1.080336000  |
| H | 3.098330000  | 3.743985000  | -0.604183000 |
| C | 1.234901000  | 4.032895000  | 0.461848000  |
| H | 0.887842000  | 4.848731000  | -0.188415000 |
| H | 0.907404000  | 4.282519000  | 1.482136000  |
| C | 0.561173000  | 2.708827000  | 0.035576000  |
| C | 0.863361000  | 1.511372000  | 0.959398000  |
| H | 0.916230000  | 2.492438000  | -0.987986000 |
| H | 1.954507000  | 1.344577000  | 0.997944000  |
| H | 0.582599000  | 1.784740000  | 1.989566000  |
| C | 7.546052000  | -1.572289000 | -0.587189000 |
| H | 8.273403000  | -0.964609000 | -0.039049000 |
| H | 7.480184000  | -2.545141000 | -0.085561000 |
| H | 7.946921000  | -1.742665000 | -1.593294000 |
| C | 6.184959000  | -0.882501000 | -0.642828000 |
| H | 5.826886000  | -0.692115000 | 0.379098000  |
| H | 6.290214000  | 0.101968000  | -1.119372000 |
| C | 5.136701000  | -1.699619000 | -1.401301000 |
| H | 5.026835000  | -2.684468000 | -0.924520000 |
| H | 5.493307000  | -1.889761000 | -2.423517000 |
| C | 3.772313000  | -1.005017000 | -1.464351000 |
| H | 3.878919000  | -0.026473000 | -1.950067000 |
| H | 3.416068000  | -0.813997000 | -0.441518000 |
| C | 2.750364000  | -1.843202000 | -2.226138000 |
| H | 2.580008000  | -2.810744000 | -1.742342000 |
| H | 3.087838000  | -2.024469000 | -3.252421000 |
| S | 1.148035000  | -0.958668000 | -2.367772000 |
| C | 0.166378000  | -2.114389000 | -3.373713000 |
| H | 0.062530000  | -3.085902000 | -2.884705000 |
| H | -0.819675000 | -1.667944000 | -3.527872000 |
| H | 0.647270000  | -2.233837000 | -4.347933000 |
| H | -1.180441000 | 3.871077000  | -0.622808000 |
| H | -1.378512000 | 3.067349000  | 0.955244000  |
| C | 3.376265000  | 5.314134000  | 0.818997000  |
| H | 3.165922000  | 5.639081000  | 1.839767000  |

|   |              |              |              |
|---|--------------|--------------|--------------|
| C | 4.126446000  | 6.087346000  | 0.034190000  |
| H | 4.363276000  | 5.804884000  | -0.990383000 |
| H | 4.537877000  | 7.029833000  | 0.385286000  |
| Y | -0.171517000 | -0.469584000 | 0.204364000  |

62

**K3,  $E_{(\text{SCF Done})} = -1297.156956$  a.u.**

|   |              |              |              |
|---|--------------|--------------|--------------|
| C | 0.250001000  | -2.108004000 | 1.063623000  |
| C | 0.260302000  | -2.526173000 | -0.302359000 |
| C | 1.610827000  | -2.481285000 | -0.766638000 |
| C | 2.433763000  | -2.039236000 | 0.313009000  |
| C | 1.595999000  | -1.807763000 | 1.446481000  |
| C | -0.912269000 | -3.043489000 | -1.089229000 |
| H | -1.868828000 | -2.677326000 | -0.701932000 |
| H | -0.953332000 | -4.140037000 | -1.044229000 |
| H | -0.858240000 | -2.777675000 | -2.151962000 |
| C | 2.081423000  | -2.948276000 | -2.116417000 |
| H | 2.169943000  | -4.042586000 | -2.137321000 |
| H | 3.068473000  | -2.549547000 | -2.372917000 |
| H | 1.390601000  | -2.676936000 | -2.924291000 |
| C | 3.934733000  | -1.965324000 | 0.312710000  |
| H | 4.309576000  | -1.191631000 | 0.991350000  |
| H | 4.345876000  | -1.768668000 | -0.683636000 |
| H | 4.367266000  | -2.917101000 | 0.648740000  |
| C | 2.066320000  | -1.504811000 | 2.838882000  |
| H | 2.318102000  | -2.433056000 | 3.369022000  |
| H | 1.300933000  | -0.993891000 | 3.431292000  |
| H | 2.960705000  | -0.874166000 | 2.846663000  |
| C | -0.936435000 | -2.117243000 | 1.987258000  |
| H | -0.993255000 | -3.068285000 | 2.533360000  |
| H | -0.881670000 | -1.323969000 | 2.741201000  |
| H | -1.884161000 | -2.005164000 | 1.449795000  |
| C | -7.308789000 | -0.830243000 | -0.193958000 |
| H | -7.907763000 | -1.437102000 | -0.880829000 |
| H | -7.216472000 | -1.386034000 | 0.746762000  |
| H | -7.871373000 | 0.087192000  | 0.015140000  |
| C | -5.938781000 | -0.515694000 | -0.790286000 |
| H | -5.414890000 | -1.453866000 | -1.023413000 |
| H | -6.065437000 | 0.010518000  | -1.746574000 |
| C | -5.067582000 | 0.332277000  | 0.139182000  |
| H | -4.937076000 | -0.192549000 | 1.096747000  |
| H | -5.590311000 | 1.270929000  | 0.371191000  |
| C | -3.695095000 | 0.654478000  | -0.461176000 |
| H | -3.824354000 | 1.188115000  | -1.411730000 |
| H | -3.170007000 | -0.283609000 | -0.693490000 |

|   |              |              |              |
|---|--------------|--------------|--------------|
| C | -2.850933000 | 1.500224000  | 0.486275000  |
| H | -2.666828000 | 0.983621000  | 1.434077000  |
| H | -3.348289000 | 2.451973000  | 0.700430000  |
| S | -1.237161000 | 1.930740000  | -0.278068000 |
| C | -0.473229000 | 3.065617000  | 0.969048000  |
| C | 1.622581000  | 3.473832000  | -0.382830000 |
| H | 1.016480000  | 3.106580000  | -1.226784000 |
| H | 1.522607000  | 4.565263000  | -0.421941000 |
| C | 1.057948000  | 2.964550000  | 0.965174000  |
| C | 1.518291000  | 1.546652000  | 1.351967000  |
| H | -0.869651000 | 2.773731000  | 1.947110000  |
| H | -0.821601000 | 4.076998000  | 0.735596000  |
| C | 3.090782000  | 3.097241000  | -0.629822000 |
| C | 3.316776000  | 1.680643000  | -1.086816000 |
| C | 2.668460000  | 1.060743000  | -2.099844000 |
| H | 3.684542000  | 3.293153000  | 0.268970000  |
| H | 3.499407000  | 3.750648000  | -1.414081000 |
| H | 4.120047000  | 1.130670000  | -0.594878000 |
| H | 1.381497000  | 3.689570000  | 1.731730000  |
| H | 0.997936000  | 1.250592000  | 2.280070000  |
| H | 2.582260000  | 1.561248000  | 1.630825000  |
| H | 3.010369000  | 0.092271000  | -2.465856000 |
| H | 1.932784000  | 1.585427000  | -2.714393000 |
| Y | 0.897644000  | -0.012806000 | -0.298362000 |

62

**TS-3,  $E_{(\text{SCF Done})} = -1297.141648$  a.u.,  $\text{IF} = i294.8351$  cm<sup>-1</sup>**

|   |              |              |              |
|---|--------------|--------------|--------------|
| C | 0.427688000  | -2.134957000 | 1.140872000  |
| C | 0.330130000  | -2.573634000 | -0.214413000 |
| C | 1.631733000  | -2.483628000 | -0.804539000 |
| C | 2.530460000  | -1.993372000 | 0.186515000  |
| C | 1.788923000  | -1.766224000 | 1.386724000  |
| C | -0.890520000 | -3.152452000 | -0.876475000 |
| H | -1.820858000 | -2.799625000 | -0.418222000 |
| H | -0.893599000 | -4.247318000 | -0.790725000 |
| H | -0.937347000 | -2.924947000 | -1.948131000 |
| C | 2.003194000  | -2.961908000 | -2.179812000 |
| H | 2.238268000  | -4.034540000 | -2.165414000 |
| H | 2.885856000  | -2.447355000 | -2.572672000 |
| H | 1.192142000  | -2.827203000 | -2.904474000 |
| C | 4.020947000  | -1.881299000 | 0.045635000  |
| H | 4.444627000  | -1.117723000 | 0.706431000  |
| H | 4.328008000  | -1.646055000 | -0.978692000 |
| H | 4.503210000  | -2.831552000 | 0.310758000  |
| C | 2.371176000  | -1.402096000 | 2.723782000  |

|   |              |              |              |
|---|--------------|--------------|--------------|
| H | 2.693550000  | -2.303439000 | 3.261570000  |
| H | 1.648472000  | -0.890232000 | 3.368719000  |
| H | 3.249262000  | -0.754357000 | 2.632300000  |
| C | -0.667770000 | -2.182070000 | 2.170259000  |
| H | -0.658471000 | -3.143370000 | 2.701156000  |
| H | -0.558627000 | -1.402206000 | 2.932546000  |
| H | -1.663981000 | -2.078522000 | 1.726106000  |
| C | -7.275572000 | -0.963539000 | -0.122331000 |
| H | -7.859744000 | -1.601034000 | -0.793941000 |
| H | -7.170239000 | -1.493887000 | 0.831603000  |
| H | -7.859811000 | -0.054865000 | 0.064316000  |
| C | -5.913442000 | -0.631537000 | -0.727151000 |
| H | -5.367570000 | -1.562472000 | -0.937615000 |
| H | -6.052512000 | -0.131784000 | -1.695774000 |
| C | -5.062586000 | 0.259096000  | 0.181111000  |
| H | -4.918938000 | -0.239484000 | 1.150760000  |
| H | -5.607274000 | 1.190411000  | 0.390893000  |
| C | -3.698597000 | 0.599431000  | -0.428619000 |
| H | -3.841615000 | 1.109032000  | -1.390295000 |
| H | -3.153179000 | -0.331898000 | -0.641406000 |
| C | -2.872756000 | 1.484807000  | 0.499368000  |
| H | -2.671089000 | 0.989907000  | 1.455397000  |
| H | -3.394894000 | 2.426337000  | 0.699599000  |
| S | -1.276089000 | 1.942593000  | -0.286060000 |
| C | -0.522877000 | 3.068223000  | 0.965170000  |
| C | 1.486643000  | 3.709578000  | -0.500242000 |
| H | 0.840746000  | 3.369028000  | -1.323731000 |
| H | 1.445390000  | 4.804122000  | -0.507129000 |
| C | 1.002651000  | 3.130087000  | 0.844483000  |
| C | 1.705271000  | 1.777534000  | 1.062070000  |
| H | -0.818709000 | 2.703970000  | 1.955092000  |
| H | -0.965031000 | 4.058113000  | 0.813931000  |
| C | 2.903601000  | 3.195404000  | -0.723521000 |
| C | 2.932138000  | 1.675631000  | -0.708821000 |
| C | 2.449488000  | 0.905465000  | -1.805421000 |
| H | 3.565425000  | 3.590753000  | 0.056703000  |
| H | 3.302009000  | 3.536196000  | -1.686306000 |
| H | 3.780626000  | 1.239936000  | -0.182890000 |
| H | 1.317542000  | 3.823279000  | 1.638642000  |
| H | 1.073927000  | 1.093042000  | 1.690099000  |
| H | 2.604451000  | 1.894593000  | 1.670235000  |
| H | 3.085052000  | 0.093293000  | -2.155807000 |
| H | 1.925394000  | 1.443703000  | -2.602752000 |
| Y | 0.831473000  | -0.042425000 | -0.319790000 |

**L3,  $E_{(\text{SCF Done})} = -1297.166110$  a.u.**

|   |              |              |              |
|---|--------------|--------------|--------------|
| C | 0.317676000  | -2.447293000 | 1.006338000  |
| C | 0.379711000  | -2.813656000 | -0.372565000 |
| C | 1.712998000  | -2.569697000 | -0.837107000 |
| C | 2.470899000  | -2.047604000 | 0.247733000  |
| C | 1.605421000  | -1.954716000 | 1.386418000  |
| C | -0.724734000 | -3.457543000 | -1.165988000 |
| H | -1.720290000 | -3.168183000 | -0.810627000 |
| H | -0.669503000 | -4.551415000 | -1.087134000 |
| H | -0.668225000 | -3.219570000 | -2.234424000 |
| C | 2.247014000  | -2.903460000 | -2.200668000 |
| H | 2.674949000  | -3.914695000 | -2.210601000 |
| H | 3.038358000  | -2.213928000 | -2.510766000 |
| H | 1.468222000  | -2.883693000 | -2.970878000 |
| C | 3.947369000  | -1.783791000 | 0.240588000  |
| H | 4.235857000  | -1.018795000 | 0.968462000  |
| H | 4.300096000  | -1.457048000 | -0.742010000 |
| H | 4.500704000  | -2.696588000 | 0.499092000  |
| C | 2.027152000  | -1.587850000 | 2.783356000  |
| H | 2.366602000  | -2.478867000 | 3.327882000  |
| H | 1.208916000  | -1.154093000 | 3.369443000  |
| H | 2.858534000  | -0.875498000 | 2.791968000  |
| C | -0.854883000 | -2.649351000 | 1.925519000  |
| H | -0.808562000 | -3.640131000 | 2.397015000  |
| H | -0.879953000 | -1.916494000 | 2.740074000  |
| H | -1.814455000 | -2.597671000 | 1.399077000  |
| C | -7.187944000 | -0.747653000 | -0.077849000 |
| H | -7.731905000 | -1.496626000 | -0.662442000 |
| H | -7.173256000 | -1.085886000 | 0.965032000  |
| H | -7.761939000 | 0.185424000  | -0.117706000 |
| C | -5.773460000 | -0.550692000 | -0.618213000 |
| H | -5.236467000 | -1.510240000 | -0.600227000 |
| H | -5.821338000 | -0.244882000 | -1.672564000 |
| C | -4.976699000 | 0.489481000  | 0.172393000  |
| H | -4.923338000 | 0.184688000  | 1.227544000  |
| H | -5.512500000 | 1.448804000  | 0.154580000  |
| C | -3.560009000 | 0.696682000  | -0.373455000 |
| H | -3.613287000 | 1.017161000  | -1.422280000 |
| H | -3.025771000 | -0.266645000 | -0.360469000 |
| C | -2.785346000 | 1.729685000  | 0.439469000  |
| H | -2.661778000 | 1.409993000  | 1.480040000  |
| H | -3.306083000 | 2.692879000  | 0.434329000  |
| S | -1.129192000 | 2.030563000  | -0.294268000 |

|   |              |              |              |
|---|--------------|--------------|--------------|
| C | -0.402264000 | 3.243594000  | 0.891223000  |
| C | 1.588434000  | 3.959162000  | -0.629196000 |
| H | 0.940674000  | 3.596043000  | -1.438655000 |
| H | 1.566215000  | 5.052491000  | -0.672833000 |
| C | 1.107034000  | 3.424047000  | 0.737560000  |
| C | 1.972885000  | 2.156170000  | 0.994275000  |
| H | -0.651612000 | 2.900520000  | 1.901916000  |
| H | -0.919663000 | 4.191833000  | 0.713162000  |
| C | 2.996136000  | 3.375785000  | -0.781623000 |
| C | 2.852805000  | 1.921836000  | -0.278828000 |
| C | 2.294531000  | 0.956529000  | -1.350180000 |
| H | 3.699037000  | 3.931975000  | -0.145352000 |
| H | 3.372813000  | 3.419489000  | -1.807948000 |
| H | 3.821237000  | 1.525060000  | 0.044501000  |
| H | 1.364868000  | 4.164328000  | 1.506434000  |
| H | 1.356336000  | 1.301020000  | 1.358715000  |
| H | 2.633672000  | 2.328532000  | 1.850939000  |
| H | 3.119636000  | 0.538955000  | -1.935644000 |
| H | 1.667070000  | 1.521799000  | -2.073678000 |
| Y | 0.647303000  | -0.260181000 | -0.302073000 |

83

**K3',  $E_{(\text{SCF Done})} = -1932.308301$  a.u.**

|   |              |              |             |
|---|--------------|--------------|-------------|
| C | -1.002133000 | 1.075503000  | 2.416373000 |
| C | -0.499058000 | -0.261248000 | 2.464221000 |
| C | 0.927026000  | -0.197290000 | 2.425721000 |
| C | 1.303981000  | 1.175739000  | 2.334720000 |
| C | 0.109908000  | 1.962501000  | 2.328117000 |
| C | -1.307229000 | -1.504594000 | 2.714196000 |
| H | -2.349453000 | -1.388407000 | 2.401180000 |
| H | -1.323578000 | -1.747622000 | 3.785399000 |
| H | -0.900655000 | -2.383524000 | 2.199535000 |
| C | 1.854468000  | -1.355937000 | 2.655169000 |
| H | 2.011517000  | -1.515732000 | 3.730836000 |
| H | 2.842999000  | -1.193336000 | 2.213456000 |
| H | 1.454749000  | -2.293816000 | 2.253675000 |
| C | 2.704283000  | 1.711536000  | 2.448246000 |
| H | 2.824376000  | 2.679027000  | 1.948469000 |
| H | 3.451563000  | 1.025306000  | 2.033891000 |
| H | 2.972337000  | 1.867947000  | 3.501842000 |
| C | 0.045051000  | 3.460827000  | 2.398444000 |
| H | 0.038818000  | 3.798588000  | 3.443613000 |
| H | -0.857703000 | 3.857778000  | 1.924526000 |
| H | 0.907307000  | 3.936346000  | 1.918500000 |
| C | -2.435049000 | 1.484625000  | 2.598872000 |

|   |              |              |              |
|---|--------------|--------------|--------------|
| H | -2.683739000 | 1.540349000  | 3.667351000  |
| H | -2.636930000 | 2.470244000  | 2.169557000  |
| H | -3.136406000 | 0.776841000  | 2.144740000  |
| C | -7.743872000 | -2.350226000 | 0.957521000  |
| H | -8.395863000 | -2.016374000 | 1.771473000  |
| H | -8.332520000 | -2.334401000 | 0.032671000  |
| H | -7.467989000 | -3.392265000 | 1.158556000  |
| C | -6.507600000 | -1.461413000 | 0.842262000  |
| H | -6.817392000 | -0.420199000 | 0.675173000  |
| H | -5.959408000 | -1.469041000 | 1.795181000  |
| C | -5.566999000 | -1.894154000 | -0.284739000 |
| H | -6.115438000 | -1.888265000 | -1.237639000 |
| H | -5.253644000 | -2.935138000 | -0.117894000 |
| C | -4.328087000 | -1.000084000 | -0.405509000 |
| H | -3.772604000 | -1.005083000 | 0.540876000  |
| H | -4.646000000 | 0.036265000  | -0.577628000 |
| C | -3.410505000 | -1.463731000 | -1.529324000 |
| H | -3.938844000 | -1.502428000 | -2.488720000 |
| H | -3.034057000 | -2.474164000 | -1.334016000 |
| S | -1.905504000 | -0.455935000 | -1.827374000 |
| C | -2.571475000 | 1.116359000  | -2.519759000 |
| C | -0.338395000 | 2.142903000  | -3.132011000 |
| H | 0.085755000  | 1.127301000  | -3.055226000 |
| H | -0.601716000 | 2.268299000  | -4.190367000 |
| C | -1.602257000 | 2.273799000  | -2.261898000 |
| C | -1.282677000 | 2.387563000  | -0.765771000 |
| H | -3.525751000 | 1.311881000  | -2.022099000 |
| H | -2.754300000 | 0.952351000  | -3.587056000 |
| C | 0.754635000  | 3.161451000  | -2.767905000 |
| C | 1.480710000  | 2.870684000  | -1.478602000 |
| C | 2.260144000  | 1.789122000  | -1.256226000 |
| H | 0.317442000  | 4.165133000  | -2.725262000 |
| H | 1.501280000  | 3.178495000  | -3.572645000 |
| H | -2.141307000 | 3.168497000  | -2.620746000 |
| C | 7.964410000  | -1.676466000 | 0.253453000  |
| H | 8.777649000  | -0.943407000 | 0.268430000  |
| H | 7.869854000  | -2.089118000 | 1.264952000  |
| H | 8.266093000  | -2.493476000 | -0.412470000 |
| C | 6.656772000  | -1.038882000 | -0.210412000 |
| H | 6.400979000  | -0.200845000 | 0.454067000  |
| H | 6.793224000  | -0.606018000 | -1.211309000 |
| C | 5.491719000  | -2.030328000 | -0.244926000 |
| H | 5.350492000  | -2.462265000 | 0.756504000  |
| H | 5.747598000  | -2.868907000 | -0.907941000 |

|   |              |              |              |
|---|--------------|--------------|--------------|
| C | 4.180176000  | -1.395156000 | -0.718596000 |
| H | 4.318294000  | -0.977526000 | -1.724724000 |
| H | 3.924770000  | -0.556323000 | -0.056458000 |
| C | 3.040572000  | -2.406851000 | -0.735892000 |
| H | 2.847149000  | -2.803365000 | 0.265644000  |
| H | 3.289443000  | -3.245575000 | -1.395786000 |
| S | 1.484435000  | -1.697688000 | -1.403851000 |
| C | 0.463347000  | -3.199544000 | -1.474013000 |
| H | 0.268033000  | -3.603798000 | -0.477249000 |
| H | -0.475555000 | -2.934783000 | -1.964453000 |
| H | 0.975323000  | -3.948141000 | -2.084651000 |
| H | 2.882027000  | 1.725128000  | -0.364453000 |
| H | 1.427358000  | 3.629100000  | -0.698055000 |
| H | 2.436101000  | 1.049068000  | -2.036816000 |
| Y | 0.081790000  | 0.606309000  | 0.068246000  |
| H | -0.944858000 | 3.407824000  | -0.535720000 |
| H | -2.220727000 | 2.273253000  | -0.193103000 |

83

**TS-3',  $E_{(\text{SCF Done})} = -1932.295079$  a.u., IF =  $i291.4027$  cm<sup>-1</sup>**

|   |              |              |              |
|---|--------------|--------------|--------------|
| C | 1.043920000  | 0.562840000  | -2.538733000 |
| C | 0.503971000  | -0.748246000 | -2.383711000 |
| C | -0.921465000 | -0.640312000 | -2.387486000 |
| C | -1.261575000 | 0.735995000  | -2.545084000 |
| C | -0.047263000 | 1.481268000  | -2.628464000 |
| C | 1.278321000  | -2.036828000 | -2.396678000 |
| H | 2.317008000  | -1.899025000 | -2.079801000 |
| H | 1.310816000  | -2.460191000 | -3.409863000 |
| H | 0.832482000  | -2.803621000 | -1.751809000 |
| C | -1.881603000 | -1.793900000 | -2.446178000 |
| H | -2.050460000 | -2.101602000 | -3.487354000 |
| H | -2.861729000 | -1.540740000 | -2.028941000 |
| H | -1.504893000 | -2.675330000 | -1.915509000 |
| C | -2.640559000 | 1.274260000  | -2.795932000 |
| H | -2.741300000 | 2.320544000  | -2.488839000 |
| H | -3.414061000 | 0.699761000  | -2.274889000 |
| H | -2.880605000 | 1.233484000  | -3.867023000 |
| C | 0.064464000  | 2.940944000  | -2.963721000 |
| H | 0.090879000  | 3.085899000  | -4.052170000 |
| H | 0.977268000  | 3.392505000  | -2.561330000 |
| H | -0.786394000 | 3.519528000  | -2.588688000 |
| C | 2.490519000  | 0.905839000  | -2.760188000 |
| H | 2.734684000  | 0.863689000  | -3.830342000 |
| H | 2.734744000  | 1.918310000  | -2.420948000 |
| H | 3.169742000  | 0.213695000  | -2.252328000 |



|   |               |               |               |
|---|---------------|---------------|---------------|
| C | 7. 586744000  | -2. 474139000 | -0. 524675000 |
| H | 8. 190672000  | -2. 346222000 | -1. 429032000 |
| H | 8. 218241000  | -2. 220953000 | 0. 335045000  |
| H | 7. 327170000  | -3. 536508000 | -0. 445664000 |
| C | 6. 336003000  | -1. 599352000 | -0. 569638000 |
| H | 6. 627972000  | -0. 545816000 | -0. 683528000 |
| H | 5. 743296000  | -1. 851798000 | -1. 460573000 |
| C | 5. 461772000  | -1. 748123000 | 0. 677668000  |
| H | 6. 055105000  | -1. 497808000 | 1. 568728000  |
| H | 5. 166703000  | -2. 801380000 | 0. 792006000  |
| C | 4. 207691000  | -0. 867816000 | 0. 639078000  |
| H | 3. 605530000  | -1. 117558000 | -0. 244003000 |
| H | 4. 507771000  | 0. 182526000  | 0. 529108000  |
| C | 3. 359858000  | -1. 047376000 | 1. 891057000  |
| H | 3. 934565000  | -0. 837232000 | 2. 800318000  |
| H | 3. 005039000  | -2. 080465000 | 1. 976776000  |
| S | 1. 840515000  | -0. 023493000 | 2. 017670000  |
| C | 2. 520053000  | 1. 660831000  | 2. 292333000  |
| C | 0. 275685000  | 2. 797656000  | 2. 812812000  |
| H | -0. 105969000 | 1. 782523000  | 3. 007170000  |
| H | 0. 503442000  | 3. 238687000  | 3. 790144000  |
| C | 1. 515162000  | 2. 746190000  | 1. 904246000  |
| C | 1. 032964000  | 2. 643522000  | 0. 449965000  |
| H | 3. 428839000  | 1. 753394000  | 1. 689935000  |
| H | 2. 791354000  | 1. 735367000  | 3. 350521000  |
| C | -0. 776915000 | 3. 601459000  | 2. 058215000  |
| C | -1. 102101000 | 2. 950349000  | 0. 722367000  |
| C | -1. 972197000 | 1. 833574000  | 0. 641822000  |
| H | -0. 405233000 | 4. 621209000  | 1. 896708000  |
| H | -1. 703888000 | 3. 684242000  | 2. 637315000  |
| H | 2. 057572000  | 3. 694451000  | 2. 039525000  |
| C | -7. 943096000 | -1. 463386000 | 0. 238632000  |
| H | -8. 729723000 | -0. 703780000 | 0. 181103000  |
| H | -7. 914319000 | -1. 985939000 | -0. 725018000 |
| H | -8. 239756000 | -2. 191330000 | 1. 002963000  |
| C | -6. 591950000 | -0. 833483000 | 0. 569068000  |
| H | -6. 339525000 | -0. 083322000 | -0. 194162000 |
| H | -6. 662304000 | -0. 289538000 | 1. 521347000  |
| C | -5. 462503000 | -1. 861978000 | 0. 659142000  |
| H | -5. 389134000 | -2. 406452000 | -0. 293715000 |
| H | -5. 714152000 | -2. 611944000 | 1. 422560000  |
| C | -4. 107020000 | -1. 231547000 | 0. 995209000  |
| H | -4. 176532000 | -0. 700157000 | 1. 953483000  |
| H | -3. 853192000 | -0. 481267000 | 0. 234869000  |

|   |              |              |              |
|---|--------------|--------------|--------------|
| C | -3.006132000 | -2.282885000 | 1.072956000  |
| H | -2.882335000 | -2.800309000 | 0.116720000  |
| H | -3.244656000 | -3.028459000 | 1.840003000  |
| S | -1.392799000 | -1.562576000 | 1.570280000  |
| C | -0.403826000 | -3.078417000 | 1.734226000  |
| H | -0.289274000 | -3.595177000 | 0.777767000  |
| H | 0.577017000  | -2.796118000 | 2.123513000  |
| H | -0.882459000 | -3.742009000 | 2.459504000  |
| H | -2.721071000 | 1.839050000  | -0.148006000 |
| H | -1.140866000 | 3.630497000  | -0.126279000 |
| H | -2.304761000 | 1.393006000  | 1.585233000  |
| Y | -0.109835000 | 0.515905000  | -0.168659000 |
| H | 1.072581000  | 3.611973000  | -0.051919000 |
| H | 1.724694000  | 2.012860000  | -0.159962000 |

83

**M3,  $E_{(\text{SCF Done})} = -1932.322581$  a.u.**

|   |              |              |              |
|---|--------------|--------------|--------------|
| C | -1.181060000 | -0.568528000 | 2.688887000  |
| C | -0.986286000 | -1.833199000 | 2.056601000  |
| C | 0.411858000  | -2.124268000 | 2.077707000  |
| C | 1.078972000  | -1.044324000 | 2.734471000  |
| C | 0.099236000  | -0.087658000 | 3.117932000  |
| C | -2.072078000 | -2.761726000 | 1.589178000  |
| H | -2.988035000 | -2.225147000 | 1.320015000  |
| H | -2.344940000 | -3.470307000 | 2.382974000  |
| H | -1.771317000 | -3.362229000 | 0.722620000  |
| C | 1.046748000  | -3.432704000 | 1.697986000  |
| H | 1.198743000  | -4.057416000 | 2.588490000  |
| H | 2.031796000  | -3.308725000 | 1.233269000  |
| H | 0.418608000  | -4.011688000 | 1.013771000  |
| C | 2.539042000  | -0.999477000 | 3.081085000  |
| H | 2.916145000  | 0.026132000  | 3.135533000  |
| H | 3.154351000  | -1.540489000 | 2.353591000  |
| H | 2.720513000  | -1.465800000 | 4.059071000  |
| C | 0.344217000  | 1.114149000  | 3.982421000  |
| H | 0.273232000  | 0.840137000  | 5.043937000  |
| H | -0.386734000 | 1.910191000  | 3.809881000  |
| H | 1.340326000  | 1.537144000  | 3.822716000  |
| C | -2.508811000 | 0.055129000  | 3.023501000  |
| H | -2.880332000 | -0.320486000 | 3.986450000  |
| H | -2.443967000 | 1.144645000  | 3.114051000  |
| H | -3.278787000 | -0.170595000 | 2.277448000  |
| C | -7.425938000 | -1.705925000 | -1.759446000 |
| H | -8.175763000 | -2.041694000 | -1.035619000 |
| H | -7.911026000 | -0.988276000 | -2.431424000 |

|   |              |              |              |
|---|--------------|--------------|--------------|
| H | -7.129531000 | -2.575051000 | -2.358705000 |
| C | -6.223483000 | -1.080275000 | -1.056405000 |
| H | -6.557642000 | -0.234891000 | -0.438601000 |
| H | -5.782069000 | -1.811229000 | -0.363552000 |
| C | -5.148770000 | -0.596671000 | -2.032730000 |
| H | -5.590170000 | 0.133075000  | -2.726345000 |
| H | -4.811534000 | -1.441305000 | -2.651378000 |
| C | -3.942859000 | 0.036802000  | -1.331045000 |
| H | -3.495710000 | -0.689646000 | -0.637542000 |
| H | -4.283475000 | 0.883636000  | -0.721106000 |
| C | -2.887380000 | 0.500837000  | -2.328068000 |
| H | -3.303102000 | 1.214545000  | -3.048566000 |
| H | -2.495870000 | -0.340071000 | -2.911920000 |
| S | -1.397342000 | 1.305080000  | -1.624438000 |
| C | -2.054183000 | 2.935789000  | -1.075487000 |
| C | 0.257579000  | 4.141368000  | -1.059996000 |
| H | 0.541718000  | 3.346114000  | -1.762193000 |
| H | 0.132846000  | 5.055168000  | -1.650092000 |
| C | -1.031059000 | 3.761380000  | -0.297910000 |
| C | -0.542012000 | 3.119867000  | 1.030206000  |
| H | -2.944526000 | 2.755751000  | -0.464645000 |
| H | -2.358208000 | 3.457799000  | -1.989384000 |
| C | 1.312675000  | 4.270017000  | 0.043621000  |
| C | 1.012671000  | 3.079947000  | 0.981314000  |
| C | 1.615212000  | 1.744037000  | 0.498242000  |
| H | 1.173885000  | 5.220990000  | 0.577618000  |
| H | 2.339048000  | 4.252696000  | -0.337011000 |
| H | -1.567160000 | 4.687531000  | -0.050674000 |
| C | 7.664710000  | -0.232075000 | -1.728241000 |
| H | 8.294245000  | 0.663618000  | -1.707460000 |
| H | 7.925259000  | -0.841733000 | -0.854791000 |
| H | 7.930863000  | -0.804179000 | -2.624907000 |
| C | 6.183017000  | 0.136824000  | -1.725820000 |
| H | 5.954827000  | 0.739175000  | -0.835030000 |
| H | 5.960846000  | 0.774659000  | -2.592637000 |
| C | 5.266334000  | -1.088167000 | -1.754451000 |
| H | 5.485079000  | -1.726496000 | -0.885946000 |
| H | 5.492709000  | -1.691309000 | -2.645297000 |
| C | 3.779338000  | -0.717647000 | -1.756607000 |
| H | 3.556788000  | -0.089679000 | -2.629109000 |
| H | 3.552868000  | -0.115332000 | -0.866516000 |
| C | 2.896227000  | -1.960283000 | -1.786804000 |
| H | 3.062633000  | -2.594968000 | -0.910046000 |
| H | 3.096205000  | -2.554395000 | -2.685466000 |

|   |              |              |              |
|---|--------------|--------------|--------------|
| S | 1.114091000  | -1.521501000 | -1.865798000 |
| C | 0.356471000  | -3.160736000 | -2.079249000 |
| H | 0.638791000  | -3.837554000 | -1.270490000 |
| H | -0.729121000 | -3.034902000 | -2.088554000 |
| H | 0.668747000  | -3.574254000 | -3.041718000 |
| H | 2.631719000  | 1.635334000  | 0.899858000  |
| H | 1.401138000  | 3.275049000  | 1.986686000  |
| H | 1.747907000  | 1.780607000  | -0.608308000 |
| Y | 0.124373000  | -0.046944000 | 0.493922000  |
| H | -0.875357000 | 3.728136000  | 1.878990000  |
| H | -1.018339000 | 2.136346000  | 1.213544000  |

69

**TS1',  $E_{(\text{SCF Done})} = -1476.39064714$  a.u., IF =  $i1270.7113$  cm<sup>-1</sup>**

|   |              |              |              |
|---|--------------|--------------|--------------|
| N | 1.441586000  | 0.604160000  | -1.947280000 |
| C | -0.162542000 | 1.975414000  | 0.061408000  |
| C | 1.334322000  | 2.081455000  | 0.013552000  |
| C | 2.130751000  | 1.409644000  | -0.950058000 |
| C | 3.528311000  | 1.539781000  | -0.943124000 |
| H | 4.129033000  | 1.030863000  | -1.689460000 |
| C | 4.153852000  | 2.349570000  | -0.005784000 |
| H | 5.234210000  | 2.458913000  | -0.023500000 |
| C | 3.387606000  | 3.032268000  | 0.943351000  |
| H | 3.869151000  | 3.679630000  | 1.670589000  |
| C | 2.009847000  | 2.882944000  | 0.955972000  |
| H | 1.416874000  | 3.419398000  | 1.692185000  |
| C | 2.269628000  | -0.437734000 | -2.584729000 |
| H | 3.021150000  | -0.010579000 | -3.261743000 |
| H | 1.616734000  | -1.090815000 | -3.169620000 |
| H | 2.782991000  | -1.035884000 | -1.826273000 |
| C | 0.839570000  | 1.456274000  | -2.996506000 |
| H | 0.185554000  | 2.206704000  | -2.553174000 |
| H | 0.258186000  | 0.837145000  | -3.682642000 |
| H | 1.627500000  | 1.968536000  | -3.564099000 |
| C | -0.563019000 | -1.981646000 | 1.525828000  |
| C | 0.550926000  | -2.580930000 | 0.862134000  |
| C | 1.710097000  | -1.807334000 | 1.159063000  |
| C | 1.317919000  | -0.741969000 | 2.028934000  |
| C | -0.087681000 | -0.837422000 | 2.236513000  |
| C | 0.532720000  | -3.886574000 | 0.122733000  |
| H | 1.233492000  | -3.903234000 | -0.719731000 |
| H | -0.462386000 | -4.120934000 | -0.265462000 |
| H | 0.821590000  | -4.707542000 | 0.792626000  |
| C | 3.126017000  | -2.156300000 | 0.793737000  |
| H | 3.605563000  | -2.718720000 | 1.606233000  |

|    |              |              |              |
|----|--------------|--------------|--------------|
| H  | 3.743918000  | -1.268251000 | 0.618682000  |
| H  | 3.178326000  | -2.791207000 | -0.097354000 |
| C  | 2.268021000  | 0.143133000  | 2.777671000  |
| H  | 1.791317000  | 1.058801000  | 3.135987000  |
| H  | 3.135380000  | 0.431225000  | 2.177376000  |
| H  | 2.646757000  | -0.389939000 | 3.660652000  |
| C  | -0.901596000 | 0.013188000  | 3.168763000  |
| H  | -0.985099000 | -0.462358000 | 4.155018000  |
| H  | -1.921090000 | 0.172747000  | 2.802444000  |
| H  | -0.448792000 | 0.996855000  | 3.326655000  |
| C  | -1.918859000 | -2.608812000 | 1.683019000  |
| H  | -1.859781000 | -3.445304000 | 2.392197000  |
| H  | -2.649746000 | -1.904136000 | 2.089017000  |
| H  | -2.319613000 | -3.009209000 | 0.746580000  |
| Sc | 0.281082000  | -0.356339000 | -0.171157000 |
| C  | -5.608312000 | 2.957402000  | 0.897446000  |
| H  | -6.628881000 | 2.968237000  | 1.294022000  |
| H  | -4.949447000 | 3.377784000  | 1.667080000  |
| H  | -5.581869000 | 3.630797000  | 0.032303000  |
| C  | -5.181835000 | 1.542829000  | 0.512458000  |
| H  | -5.253430000 | 0.884778000  | 1.389837000  |
| H  | -5.881593000 | 1.136607000  | -0.230832000 |
| C  | -3.759740000 | 1.479241000  | -0.050577000 |
| H  | -3.061497000 | 1.892011000  | 0.691904000  |
| H  | -3.693917000 | 2.133296000  | -0.933573000 |
| C  | -3.335623000 | 0.057533000  | -0.432621000 |
| H  | -4.078620000 | -0.358725000 | -1.128641000 |
| H  | -3.359628000 | -0.583320000 | 0.455054000  |
| C  | -1.950483000 | 0.004794000  | -1.075040000 |
| S  | -1.435329000 | -1.651895000 | -1.632681000 |
| C  | -1.565290000 | -1.620206000 | -3.451289000 |
| H  | -1.008685000 | -0.793834000 | -3.896100000 |
| H  | -2.619380000 | -1.549236000 | -3.730500000 |
| H  | -1.164161000 | -2.568916000 | -3.818999000 |
| H  | -1.061105000 | 0.942571000  | -0.376030000 |
| H  | -1.929843000 | 0.640371000  | -1.973118000 |
| H  | -0.525996000 | 2.281548000  | 1.046680000  |
| H  | -0.629358000 | 2.648367000  | -0.671249000 |

91

**2,1-TS2',  $E_{(\text{SCF Done})} = -2020.51522117$  a.u., IF =  $i254.5565$  cm<sup>-1</sup>**

|   |              |              |             |
|---|--------------|--------------|-------------|
| C | 1.093931000  | -2.111895000 | 1.745123000 |
| C | -0.041986000 | -1.566309000 | 2.415675000 |
| C | -1.191776000 | -2.317817000 | 2.028634000 |
| C | -0.765336000 | -3.328568000 | 1.118613000 |

|    |              |              |              |
|----|--------------|--------------|--------------|
| C  | 0.644528000  | -3.207226000 | 0.948545000  |
| C  | 0.003313000  | -0.522099000 | 3.493197000  |
| H  | -0.959330000 | -0.017365000 | 3.619466000  |
| H  | 0.766683000  | 0.240064000  | 3.305062000  |
| H  | 0.247406000  | -0.981681000 | 4.460535000  |
| C  | -2.571310000 | -2.163981000 | 2.599175000  |
| H  | -2.681704000 | -2.770354000 | 3.508013000  |
| H  | -3.349522000 | -2.489749000 | 1.902284000  |
| H  | -2.792630000 | -1.128774000 | 2.879599000  |
| C  | -1.606467000 | -4.434031000 | 0.549473000  |
| H  | -1.360300000 | -4.656865000 | -0.495388000 |
| H  | -2.675759000 | -4.209233000 | 0.599237000  |
| H  | -1.451419000 | -5.362443000 | 1.115183000  |
| C  | 1.504586000  | -4.209783000 | 0.233420000  |
| H  | 1.641592000  | -5.101450000 | 0.859786000  |
| H  | 2.505150000  | -3.826241000 | 0.014938000  |
| H  | 1.063773000  | -4.558346000 | -0.707890000 |
| C  | 2.519130000  | -1.710802000 | 1.995770000  |
| H  | 2.626732000  | -0.630738000 | 2.142205000  |
| H  | 2.902082000  | -2.194623000 | 2.904522000  |
| H  | 3.183692000  | -2.001913000 | 1.177207000  |
| Sc | -0.366396000 | -1.151368000 | 0.018756000  |
| C  | 8.104118000  | -0.700988000 | -1.516238000 |
| H  | 8.910724000  | -0.001047000 | -1.274307000 |
| H  | 8.210864000  | -1.571413000 | -0.857917000 |
| H  | 8.258548000  | -1.042091000 | -2.546703000 |
| C  | 6.736167000  | -0.043319000 | -1.349615000 |
| H  | 6.625399000  | 0.319599000  | -0.317876000 |
| H  | 6.672990000  | 0.843506000  | -1.995507000 |
| C  | 5.578975000  | -0.988924000 | -1.679204000 |
| H  | 5.639525000  | -1.877308000 | -1.033810000 |
| H  | 5.687337000  | -1.350562000 | -2.711580000 |
| C  | 4.205277000  | -0.329060000 | -1.515152000 |
| H  | 4.142652000  | 0.552772000  | -2.166413000 |
| H  | 4.092146000  | 0.027301000  | -0.482109000 |
| C  | 3.074319000  | -1.295245000 | -1.854020000 |
| H  | 3.069596000  | -2.160691000 | -1.187488000 |
| H  | 3.161574000  | -1.651047000 | -2.886015000 |
| S  | 1.440468000  | -0.447596000 | -1.747766000 |
| C  | 0.192417000  | -1.670575000 | -2.215544000 |
| H  | -2.397369000 | 2.086353000  | 1.376164000  |
| H  | 4.802357000  | 6.001637000  | 1.988683000  |
| C  | -1.370752000 | 2.399368000  | 1.572775000  |
| H  | -1.079208000 | 2.104586000  | 2.583106000  |

|   |              |              |              |
|---|--------------|--------------|--------------|
| H | -1.311124000 | 3.484420000  | 1.464572000  |
| S | -0.304632000 | 1.616035000  | 0.326384000  |
| C | 1.347251000  | 2.239455000  | 0.822274000  |
| H | 1.465432000  | 2.068261000  | 1.898306000  |
| H | 2.060105000  | 1.592992000  | 0.301237000  |
| H | 0.500837000  | -2.677620000 | -1.897672000 |
| H | 0.052043000  | -1.670306000 | -3.294083000 |
| H | 5.420045000  | 5.506621000  | 0.404704000  |
| C | 1.579207000  | 3.702601000  | 0.456444000  |
| H | 0.832049000  | 4.338788000  | 0.948265000  |
| H | 1.439861000  | 3.830526000  | -0.624368000 |
| C | 2.981070000  | 4.168609000  | 0.862623000  |
| H | 3.733974000  | 3.534017000  | 0.372331000  |
| H | 3.117144000  | 4.027093000  | 1.944872000  |
| C | 3.246422000  | 5.633494000  | 0.507271000  |
| H | 2.494137000  | 6.266404000  | 0.998222000  |
| H | 3.106352000  | 5.774472000  | -0.573449000 |
| C | 4.644925000  | 6.097282000  | 0.907701000  |
| H | 4.803660000  | 7.147447000  | 0.641289000  |
| C | -2.499316000 | -1.272113000 | -0.804764000 |
| H | -1.926743000 | -2.421780000 | -2.542635000 |
| C | -1.873070000 | -1.448492000 | -2.058317000 |
| H | -1.880385000 | -0.613186000 | -2.757992000 |
| H | -2.918851000 | -2.176885000 | -0.365824000 |
| C | -3.277917000 | -0.001267000 | -0.500870000 |
| H | -3.308714000 | 0.181024000  | 0.584216000  |
| H | -2.781577000 | 0.868699000  | -0.957070000 |
| C | -4.728620000 | -0.058122000 | -1.011762000 |
| H | -4.714099000 | -0.215603000 | -2.099311000 |
| H | -5.223761000 | -0.940105000 | -0.581212000 |
| C | -5.535614000 | 1.197186000  | -0.679401000 |
| H | -5.034221000 | 2.078025000  | -1.108474000 |
| H | -5.542386000 | 1.348513000  | 0.411048000  |
| C | -6.977835000 | 1.141340000  | -1.187019000 |
| H | -6.973809000 | 0.989655000  | -2.276462000 |
| H | -7.479667000 | 0.260738000  | -0.759567000 |
| C | -7.788369000 | 2.395411000  | -0.854856000 |
| H | -7.286096000 | 3.274943000  | -1.282492000 |
| H | -7.791893000 | 2.546405000  | 0.234195000  |
| C | -9.226196000 | 2.330766000  | -1.365234000 |
| H | -9.779917000 | 3.241532000  | -1.112597000 |
| H | -9.256038000 | 2.215426000  | -2.455452000 |
| H | -9.765439000 | 1.481924000  | -0.927651000 |

**B',  $E_{(\text{SCF Done})} = -2111.565494$  a.u.**

|    |              |              |              |
|----|--------------|--------------|--------------|
| Sc | 0.258615000  | -1.353456000 | 0.291078000  |
| C  | -1.946012000 | -1.723457000 | 0.025336000  |
| H  | 1.771432000  | -0.745300000 | -3.316958000 |
| C  | 2.465184000  | -0.160943000 | -2.711384000 |
| C  | -1.570446000 | -0.614992000 | -3.595533000 |
| H  | -1.938799000 | 0.132671000  | -4.290666000 |
| C  | -0.623097000 | -1.541009000 | -4.054769000 |
| H  | -0.278755000 | -1.488730000 | -5.084189000 |
| C  | -0.176406000 | -2.541441000 | -3.207149000 |
| H  | 0.519909000  | -3.299677000 | -3.554914000 |
| C  | -0.659906000 | -2.585329000 | -1.890601000 |
| H  | -0.392805000 | -3.434970000 | -1.264969000 |
| C  | 1.679461000  | -3.361967000 | 0.542535000  |
| C  | 2.383030000  | -2.282210000 | 1.151342000  |
| C  | 1.632734000  | -1.851938000 | 2.285185000  |
| C  | 0.461342000  | -2.665728000 | 2.375022000  |
| C  | 0.500615000  | -3.608665000 | 1.311299000  |
| C  | 3.772983000  | -1.846455000 | 0.790018000  |
| H  | 4.003295000  | -0.843784000 | 1.161667000  |
| H  | 3.946607000  | -1.856537000 | -0.291510000 |
| H  | 4.513600000  | -2.526490000 | 1.232782000  |
| C  | 2.114016000  | -0.903412000 | 3.344596000  |
| H  | 1.288144000  | -0.418360000 | 3.874399000  |
| H  | 2.774240000  | -0.126201000 | 2.944220000  |
| H  | 2.695919000  | -1.447474000 | 4.100828000  |
| C  | -0.562012000 | -2.620861000 | 3.471360000  |
| H  | -1.555989000 | -2.910453000 | 3.115838000  |
| H  | -0.650780000 | -1.621685000 | 3.907626000  |
| H  | -0.292924000 | -3.311168000 | 4.282244000  |
| C  | -0.436034000 | -4.769330000 | 1.145558000  |
| H  | -0.036089000 | -5.650701000 | 1.664548000  |
| H  | -0.582619000 | -5.062064000 | 0.100217000  |
| H  | -1.421902000 | -4.568522000 | 1.575237000  |
| C  | 2.206347000  | -4.210851000 | -0.579427000 |
| H  | 2.961105000  | -4.915328000 | -0.204793000 |
| H  | 1.421688000  | -4.811930000 | -1.049084000 |
| H  | 2.686892000  | -3.617669000 | -1.365564000 |
| N  | -3.105208000 | 0.228598000  | -1.869382000 |
| C  | 5.600480000  | 5.720127000  | -0.196191000 |
| H  | 5.773678000  | 6.705995000  | -0.640109000 |
| H  | 5.353198000  | 5.871171000  | 0.861501000  |
| H  | 6.545232000  | 5.165383000  | -0.241019000 |
| C  | 4.485084000  | 4.975935000  | -0.926547000 |



|   |               |               |               |
|---|---------------|---------------|---------------|
| H | 3. 562377000  | 5. 572224000  | -0. 896047000 |
| H | 4. 746199000  | 4. 871668000  | -1. 988826000 |
| C | 4. 209768000  | 3. 590156000  | -0. 338135000 |
| H | 3. 949888000  | 3. 692909000  | 0. 726084000  |
| H | 5. 132050000  | 2. 992020000  | -0. 371042000 |
| C | 3. 089805000  | 2. 842815000  | -1. 068774000 |
| H | 3. 356008000  | 2. 736084000  | -2. 128564000 |
| H | 2. 164188000  | 3. 432561000  | -1. 041084000 |
| C | 2. 833304000  | 1. 468246000  | -0. 457110000 |
| H | 2. 508483000  | 1. 558935000  | 0. 583393000  |
| H | 3. 738438000  | 0. 852337000  | -0. 462702000 |
| S | 1. 515884000  | 0. 526979000  | -1. 322772000 |
| C | -2. 094639000 | -0. 662651000 | -2. 303123000 |
| C | -1. 630630000 | -1. 675653000 | -1. 396134000 |
| C | -2. 029412000 | 1. 801167000  | 1. 180347000  |
| S | -0. 627754000 | 0. 785261000  | 1. 799099000  |
| C | 0. 472111000  | 2. 119841000  | 2. 365080000  |
| C | -4. 410664000 | -0. 415807000 | -1. 682424000 |
| H | -4. 302637000 | -1. 340127000 | -1. 112404000 |
| H | -5. 073501000 | 0. 257364000  | -1. 129817000 |
| H | -4. 884325000 | -0. 656829000 | -2. 648110000 |
| C | -3. 241335000 | 1. 460194000  | -2. 631887000 |
| H | -3. 908527000 | 2. 136738000  | -2. 088786000 |
| H | -2. 267320000 | 1. 947304000  | -2. 736403000 |
| H | -3. 673116000 | 1. 310753000  | -3. 636535000 |
| C | -2. 923330000 | 2. 268099000  | 2. 330658000  |
| C | -3. 991454000 | 3. 285974000  | 1. 909172000  |
| C | -5. 107992000 | 2. 725221000  | 1. 027392000  |
| C | -6. 176214000 | 3. 765561000  | 0. 696572000  |
| H | -5. 747646000 | 4. 620163000  | 0. 159225000  |
| H | -6. 967621000 | 3. 340495000  | 0. 069890000  |
| H | -6. 646996000 | 4. 151225000  | 1. 608412000  |
| H | 3. 277734000  | -0. 798230000 | -2. 353717000 |
| H | 2. 866482000  | 0. 657393000  | -3. 313757000 |
| H | 0. 727493000  | 2. 793469000  | 1. 542670000  |
| H | -0. 025764000 | 2. 684235000  | 3. 157160000  |
| H | 1. 377158000  | 1. 674099000  | 2. 778740000  |
| H | -2. 121754000 | -2. 726251000 | 0. 420108000  |
| H | -2. 694200000 | -1. 019236000 | 0. 380944000  |
| H | -1. 597737000 | 2. 648802000  | 0. 634473000  |
| H | -2. 556915000 | 1. 181689000  | 0. 448858000  |
| H | -2. 301829000 | 2. 724787000  | 3. 111418000  |
| H | -3. 400466000 | 1. 393389000  | 2. 791137000  |
| H | -4. 439325000 | 3. 699235000  | 2. 822826000  |

|   |              |             |             |
|---|--------------|-------------|-------------|
| H | -3.509904000 | 4.134791000 | 1.401137000 |
| H | -4.682927000 | 2.330993000 | 0.094363000 |
| H | -5.572875000 | 1.869566000 | 1.537714000 |

90

**TS1',  $E_{(\text{SCF Done})} = -2111.515125$  a.u., IF =  $i1222.7897$  cm<sup>-1</sup>**

|    |              |              |              |
|----|--------------|--------------|--------------|
| Sc | 0.400250000  | -0.982056000 | 0.503502000  |
| C  | -1.788258000 | -1.249575000 | -0.146500000 |
| H  | -0.634784000 | -1.028554000 | -1.069038000 |
| C  | 0.454968000  | -0.651062000 | -1.855619000 |
| C  | -4.788028000 | -0.896891000 | -2.475778000 |
| H  | -5.701439000 | -0.317572000 | -2.565784000 |
| C  | -4.479642000 | -1.827603000 | -3.465225000 |
| H  | -5.147218000 | -1.951899000 | -4.313505000 |
| C  | -3.330702000 | -2.604113000 | -3.352389000 |
| H  | -3.084630000 | -3.341939000 | -4.110942000 |
| C  | -2.487058000 | -2.414806000 | -2.260604000 |
| H  | -1.577104000 | -3.006349000 | -2.181313000 |
| C  | 0.686509000  | -3.404817000 | 0.776456000  |
| C  | 1.951964000  | -2.880578000 | 0.368584000  |
| C  | 2.436251000  | -2.033049000 | 1.410737000  |
| C  | 1.467700000  | -2.030967000 | 2.459035000  |
| C  | 0.385688000  | -2.873452000 | 2.061885000  |
| C  | 2.724333000  | -3.327280000 | -0.839264000 |
| H  | 3.468828000  | -2.590847000 | -1.156521000 |
| H  | 2.078462000  | -3.542469000 | -1.697285000 |
| H  | 3.272640000  | -4.252945000 | -0.619376000 |
| C  | 3.795239000  | -1.396441000 | 1.470869000  |
| H  | 3.788739000  | -0.442229000 | 2.007705000  |
| H  | 4.207494000  | -1.210276000 | 0.475003000  |
| H  | 4.505150000  | -2.052279000 | 1.992373000  |
| C  | 1.634121000  | -1.448096000 | 3.834027000  |
| H  | 0.743935000  | -0.914800000 | 4.187396000  |
| H  | 2.487743000  | -0.766443000 | 3.890994000  |
| H  | 1.828116000  | -2.249928000 | 4.558655000  |
| C  | -0.793032000 | -3.222238000 | 2.924261000  |
| H  | -0.510338000 | -3.975320000 | 3.672114000  |
| H  | -1.618856000 | -3.646450000 | 2.345044000  |
| H  | -1.178480000 | -2.356893000 | 3.475979000  |
| C  | -0.100485000 | -4.453653000 | 0.046613000  |
| H  | 0.193816000  | -5.454821000 | 0.388897000  |
| H  | -1.178629000 | -4.362909000 | 0.210508000  |
| H  | 0.073955000  | -4.423408000 | -1.033201000 |
| N  | -4.273080000 | 0.222875000  | -0.332051000 |
| C  | 7.757323000  | 2.569979000  | -2.311135000 |

|   |              |              |              |
|---|--------------|--------------|--------------|
| H | 8.424477000  | 3.353387000  | -1.936699000 |
| H | 8.243908000  | 1.604249000  | -2.129440000 |
| H | 7.669397000  | 2.699437000  | -3.396300000 |
| C | 6.391313000  | 2.639802000  | -1.632434000 |
| H | 6.515309000  | 2.543322000  | -0.544451000 |
| H | 5.945283000  | 3.629405000  | -1.803785000 |
| C | 5.426409000  | 1.560478000  | -2.128368000 |
| H | 5.869761000  | 0.568825000  | -1.956808000 |
| H | 5.300064000  | 1.657246000  | -3.216023000 |
| C | 4.053875000  | 1.632340000  | -1.450101000 |
| H | 3.609105000  | 2.620341000  | -1.628580000 |
| H | 4.175908000  | 1.528174000  | -0.363262000 |
| C | 3.114077000  | 0.549132000  | -1.968609000 |
| H | 3.502978000  | -0.452396000 | -1.766331000 |
| H | 2.953871000  | 0.649470000  | -3.047055000 |
| S | 1.452267000  | 0.707309000  | -1.194175000 |
| C | -3.956551000 | -0.711553000 | -1.363703000 |
| C | -2.766411000 | -1.472153000 | -1.263095000 |
| C | -1.020961000 | 2.459370000  | 1.174798000  |
| S | -0.165933000 | 1.143765000  | 2.138695000  |
| C | 1.427921000  | 1.949193000  | 2.479731000  |
| C | -4.777638000 | -0.417484000 | 0.883876000  |
| H | -4.108482000 | -1.222599000 | 1.197919000  |
| H | -4.830386000 | 0.322270000  | 1.690738000  |
| H | -5.783959000 | -0.846200000 | 0.741126000  |
| C | -5.140524000 | 1.323936000  | -0.725166000 |
| H | -5.142429000 | 2.072299000  | 0.073964000  |
| H | -4.760463000 | 1.792333000  | -1.637452000 |
| H | -6.188518000 | 1.022232000  | -0.895367000 |
| C | -1.421528000 | 3.652038000  | 2.043872000  |
| C | -1.921373000 | 4.848854000  | 1.222798000  |
| C | -3.218972000 | 4.612449000  | 0.448805000  |
| C | -3.709053000 | 5.868218000  | -0.269593000 |
| H | -2.966831000 | 6.227941000  | -0.992212000 |
| H | -4.638974000 | 5.677416000  | -0.815702000 |
| H | -3.901405000 | 6.680973000  | 0.440530000  |
| H | 1.090210000  | -1.481366000 | -2.179121000 |
| H | -0.168855000 | -0.318282000 | -2.689074000 |
| H | 1.929780000  | 2.223585000  | 1.548464000  |
| H | 1.266806000  | 2.834394000  | 3.098381000  |
| H | 2.042382000  | 1.242554000  | 3.038861000  |
| H | -1.852358000 | -2.060757000 | 0.596891000  |
| H | -2.056814000 | -0.308850000 | 0.368141000  |
| H | -0.355205000 | 2.759001000  | 0.356865000  |

|   |              |             |              |
|---|--------------|-------------|--------------|
| H | -1.897072000 | 1.971065000 | 0.734320000  |
| H | -0.561677000 | 3.983458000 | 2.638479000  |
| H | -2.191213000 | 3.334684000 | 2.758794000  |
| H | -2.068443000 | 5.688454000 | 1.915216000  |
| H | -1.131163000 | 5.167768000 | 0.527076000  |
| H | -3.078581000 | 3.808047000 | -0.286224000 |
| H | -3.993685000 | 4.262457000 | 1.146338000  |

90

**C'', E<sub>(SCF Done)</sub> = -2111.556644 a.u.**

|    |              |              |              |
|----|--------------|--------------|--------------|
| Sc | 0.680999000  | -1.034374000 | -0.162046000 |
| C  | -2.077164000 | -1.451901000 | -1.122354000 |
| H  | -1.183535000 | -1.115681000 | -1.678849000 |
| C  | 1.100082000  | 0.002771000  | -2.071165000 |
| C  | -5.340535000 | 0.493670000  | -0.816224000 |
| H  | -6.184556000 | 0.586481000  | -0.139793000 |
| C  | -5.309050000 | 1.267201000  | -1.974450000 |
| H  | -6.124319000 | 1.954846000  | -2.182651000 |
| C  | -4.247242000 | 1.145861000  | -2.866974000 |
| H  | -4.218934000 | 1.738602000  | -3.776695000 |
| C  | -3.214392000 | 0.256395000  | -2.578389000 |
| H  | -2.377922000 | 0.163777000  | -3.268728000 |
| C  | 0.956289000  | -3.419095000 | -0.620398000 |
| C  | 2.255301000  | -2.832378000 | -0.650347000 |
| C  | 2.558231000  | -2.358949000 | 0.664048000  |
| C  | 1.445495000  | -2.662360000 | 1.505180000  |
| C  | 0.454735000  | -3.314875000 | 0.712004000  |
| C  | 3.193262000  | -2.884425000 | -1.819968000 |
| H  | 3.933252000  | -2.078894000 | -1.802061000 |
| H  | 2.663448000  | -2.831539000 | -2.776299000 |
| H  | 3.754017000  | -3.828835000 | -1.815447000 |
| C  | 3.879854000  | -1.816033000 | 1.127001000  |
| H  | 3.771463000  | -1.059276000 | 1.910887000  |
| H  | 4.448488000  | -1.365479000 | 0.309078000  |
| H  | 4.500420000  | -2.621777000 | 1.541364000  |
| C  | 1.386956000  | -2.507960000 | 2.998179000  |
| H  | 0.408632000  | -2.163304000 | 3.352986000  |
| H  | 2.149993000  | -1.817593000 | 3.370368000  |
| H  | 1.575854000  | -3.473586000 | 3.486114000  |
| C  | -0.816759000 | -3.904721000 | 1.251245000  |
| H  | -0.605134000 | -4.845168000 | 1.777365000  |
| H  | -1.534752000 | -4.136356000 | 0.460124000  |
| H  | -1.313679000 | -3.242595000 | 1.969417000  |
| C  | 0.308933000  | -4.126248000 | -1.776799000 |
| H  | 0.803124000  | -5.089361000 | -1.959254000 |

|   |              |              |              |
|---|--------------|--------------|--------------|
| H | -0.746426000 | -4.341702000 | -1.589550000 |
| H | 0.373237000  | -3.552911000 | -2.708724000 |
| N | -4.320473000 | -1.215016000 | 0.654796000  |
| C | 8.319954000  | 3.026880000  | -0.253185000 |
| H | 8.894470000  | 3.616864000  | 0.468651000  |
| H | 8.796060000  | 2.042132000  | -0.331428000 |
| H | 8.409363000  | 3.517919000  | -1.229440000 |
| C | 6.858954000  | 2.904643000  | 0.173506000  |
| H | 6.803618000  | 2.442459000  | 1.169373000  |
| H | 6.420443000  | 3.907061000  | 0.276228000  |
| C | 6.019093000  | 2.086732000  | -0.810038000 |
| H | 6.455765000  | 1.082701000  | -0.914266000 |
| H | 6.071870000  | 2.549536000  | -1.805803000 |
| C | 4.552082000  | 1.965276000  | -0.384107000 |
| H | 4.115040000  | 2.967999000  | -0.286606000 |
| H | 4.494868000  | 1.495644000  | 0.607353000  |
| C | 3.739627000  | 1.151840000  | -1.385614000 |
| H | 4.121136000  | 0.131226000  | -1.477194000 |
| H | 3.755559000  | 1.616286000  | -2.377185000 |
| S | 1.968822000  | 1.079863000  | -0.896519000 |
| C | -4.314363000 | -0.414623000 | -0.522458000 |
| C | -3.224210000 | -0.521438000 | -1.416822000 |
| C | -1.235149000 | 1.945011000  | 0.963045000  |
| S | -0.522601000 | 0.458824000  | 1.783793000  |
| C | 0.857564000  | 1.182620000  | 2.724100000  |
| C | -4.700849000 | -2.607523000 | 0.418598000  |
| H | -4.139797000 | -3.026623000 | -0.419816000 |
| H | -4.481068000 | -3.201850000 | 1.312156000  |
| H | -5.774791000 | -2.711209000 | 0.188975000  |
| C | -5.048920000 | -0.670803000 | 1.791669000  |
| H | -4.780676000 | -1.242725000 | 2.686394000  |
| H | -4.764440000 | 0.372722000  | 1.952771000  |
| H | -6.145804000 | -0.723000000 | 1.681534000  |
| C | -1.867964000 | 2.923247000  | 1.951010000  |
| C | -2.361984000 | 4.209951000  | 1.274263000  |
| C | -3.519927000 | 4.025850000  | 0.291900000  |
| C | -4.027284000 | 5.354423000  | -0.265434000 |
| H | -3.234431000 | 5.889712000  | -0.801669000 |
| H | -4.855603000 | 5.200830000  | -0.965202000 |
| H | -4.386143000 | 6.010742000  | 0.536222000  |
| H | 1.821953000  | -0.518720000 | -2.708280000 |
| H | 0.420970000  | 0.593437000  | -2.692341000 |
| H | 1.508454000  | 1.766572000  | 2.069042000  |
| H | 0.463070000  | 1.807283000  | 3.527950000  |

|   |              |              |              |
|---|--------------|--------------|--------------|
| H | 1.420414000  | 0.359540000  | 3.167795000  |
| H | -2.262665000 | -2.481694000 | -1.449088000 |
| H | -1.918627000 | -1.506568000 | -0.031645000 |
| H | -0.439575000 | 2.422217000  | 0.379199000  |
| H | -1.978468000 | 1.544289000  | 0.265818000  |
| H | -1.134298000 | 3.199268000  | 2.718037000  |
| H | -2.697754000 | 2.427826000  | 2.471117000  |
| H | -2.674700000 | 4.902145000  | 2.067589000  |
| H | -1.519118000 | 4.699412000  | 0.764303000  |
| H | -3.216024000 | 3.379004000  | -0.541802000 |
| H | -4.342650000 | 3.501670000  | 0.798477000  |

83

**J4,  $E_{(\text{SCF Done})} = -1933.922654$  a.u.**

|   |              |              |              |
|---|--------------|--------------|--------------|
| C | -1.593904000 | -2.259077000 | 1.292689000  |
| C | -0.334761000 | -2.871441000 | 1.009648000  |
| C | 0.649446000  | -2.262230000 | 1.846571000  |
| C | 0.001532000  | -1.275255000 | 2.650467000  |
| C | -1.385874000 | -1.271442000 | 2.304342000  |
| C | -0.124398000 | -4.058476000 | 0.111835000  |
| H | 0.893189000  | -4.102849000 | -0.291925000 |
| H | -0.822799000 | -4.072024000 | -0.732879000 |
| H | -0.283200000 | -4.995362000 | 0.662662000  |
| C | 2.087918000  | -2.680002000 | 1.972559000  |
| H | 2.202660000  | -3.439386000 | 2.757622000  |
| H | 2.740190000  | -1.843399000 | 2.245431000  |
| H | 2.477571000  | -3.122058000 | 1.048976000  |
| C | 0.628114000  | -0.512886000 | 3.781510000  |
| H | 0.095968000  | 0.419503000  | 3.992747000  |
| H | 1.672797000  | -0.254665000 | 3.581338000  |
| H | 0.611999000  | -1.110048000 | 4.703210000  |
| C | -2.449257000 | -0.465370000 | 2.996630000  |
| H | -2.739555000 | -0.938537000 | 3.944047000  |
| H | -3.360280000 | -0.379078000 | 2.395401000  |
| H | -2.111388000 | 0.548164000  | 3.241289000  |
| C | -2.917690000 | -2.691573000 | 0.725767000  |
| H | -2.854289000 | -2.971379000 | -0.332775000 |
| H | -3.298612000 | -3.572503000 | 1.259556000  |
| H | -3.681543000 | -1.913061000 | 0.817725000  |
| C | -8.333979000 | 0.319662000  | -1.203210000 |
| H | -8.984986000 | -0.334663000 | -1.792326000 |
| H | -8.495937000 | 0.084029000  | -0.144601000 |
| H | -8.663832000 | 1.352073000  | -1.368426000 |
| C | -6.869618000 | 0.136738000  | -1.595232000 |
| H | -6.579117000 | -0.914042000 | -1.453578000 |

|   |              |              |              |
|---|--------------|--------------|--------------|
| H | -6.746377000 | 0.346890000  | -2.666770000 |
| C | -5.924315000 | 1.034937000  | -0.794277000 |
| H | -6.045401000 | 0.826898000  | 0.278752000  |
| H | -6.212998000 | 2.085866000  | -0.937555000 |
| C | -4.454657000 | 0.855936000  | -1.189353000 |
| H | -4.330469000 | 1.071474000  | -2.258416000 |
| H | -4.163004000 | -0.193494000 | -1.041516000 |
| C | -3.539854000 | 1.769029000  | -0.379457000 |
| H | -3.618402000 | 1.573570000  | 0.694609000  |
| H | -3.789786000 | 2.820596000  | -0.557054000 |
| S | -1.786819000 | 1.580797000  | -0.894084000 |
| C | -0.940111000 | 2.979324000  | -0.037953000 |
| C | 2.748014000  | 4.121989000  | 0.404827000  |
| H | 3.141921000  | 3.334553000  | 1.063154000  |
| H | 3.080135000  | 3.882544000  | -0.614930000 |
| C | 1.214611000  | 4.104676000  | 0.464009000  |
| H | 0.837984000  | 4.917812000  | -0.173136000 |
| H | 0.886242000  | 4.331521000  | 1.489305000  |
| C | 0.580864000  | 2.765731000  | 0.024992000  |
| C | 0.939142000  | 1.565328000  | 0.927189000  |
| H | 0.929573000  | 2.574223000  | -1.004811000 |
| H | 2.033518000  | 1.425437000  | 0.921601000  |
| H | 0.698097000  | 1.832779000  | 1.969721000  |
| C | 7.520095000  | -1.722454000 | -0.702695000 |
| H | 8.279406000  | -1.170311000 | -0.139304000 |
| H | 7.422763000  | -2.714366000 | -0.245500000 |
| H | 7.898936000  | -1.861362000 | -1.722094000 |
| C | 6.187201000  | -0.977614000 | -0.703541000 |
| H | 5.852090000  | -0.821067000 | 0.331583000  |
| H | 6.324613000  | 0.023207000  | -1.135651000 |
| C | 5.096194000  | -1.716577000 | -1.481686000 |
| H | 4.954497000  | -2.717974000 | -1.050068000 |
| H | 5.429718000  | -1.871945000 | -2.517492000 |
| C | 3.759655000  | -0.966983000 | -1.488738000 |
| H | 3.897503000  | 0.028968000  | -1.928786000 |
| H | 3.425935000  | -0.811746000 | -0.452629000 |
| C | 2.694394000  | -1.727742000 | -2.272205000 |
| H | 2.493038000  | -2.710363000 | -1.833180000 |
| H | 3.007939000  | -1.871850000 | -3.311924000 |
| S | 1.126042000  | -0.775593000 | -2.345897000 |
| C | 0.082355000  | -1.843887000 | -3.385937000 |
| H | -0.049205000 | -2.833953000 | -2.943248000 |
| H | -0.888015000 | -1.352918000 | -3.497753000 |
| H | 0.541049000  | -1.932962000 | -4.373944000 |

|    |              |              |              |
|----|--------------|--------------|--------------|
| H  | -1.202156000 | 3.884560000  | -0.594981000 |
| H  | -1.358997000 | 3.053504000  | 0.972590000  |
| C  | 3.317746000  | 5.446854000  | 0.822243000  |
| H  | 3.102449000  | 5.755823000  | 1.846898000  |
| C  | 4.040600000  | 6.249876000  | 0.041689000  |
| H  | 4.281160000  | 5.984404000  | -0.986502000 |
| H  | 4.425157000  | 7.200932000  | 0.400125000  |
| Lu | -0.124818000 | -0.390108000 | 0.231958000  |

62

**K4,  $E_{(\text{SCF Done})} = -1298.778641$  a.u.**

|   |              |              |              |
|---|--------------|--------------|--------------|
| C | 0.005029000  | -2.099592000 | 1.024364000  |
| C | 0.058020000  | -2.465122000 | -0.356180000 |
| C | 1.428726000  | -2.467321000 | -0.759656000 |
| C | 2.222552000  | -2.106628000 | 0.371826000  |
| C | 1.345485000  | -1.878520000 | 1.476805000  |
| C | -1.099054000 | -2.901646000 | -1.211606000 |
| H | -2.055414000 | -2.511522000 | -0.848701000 |
| H | -1.185730000 | -3.996396000 | -1.214421000 |
| H | -0.989978000 | -2.595096000 | -2.258791000 |
| C | 1.937892000  | -2.911794000 | -2.103037000 |
| H | 1.983127000  | -4.007636000 | -2.155964000 |
| H | 2.950744000  | -2.547782000 | -2.304991000 |
| H | 1.294110000  | -2.587034000 | -2.929504000 |
| C | 3.724081000  | -2.096785000 | 0.437757000  |
| H | 4.101428000  | -1.357397000 | 1.152356000  |
| H | 4.185046000  | -1.891443000 | -0.534585000 |
| H | 4.102823000  | -3.074241000 | 0.764699000  |
| C | 1.766384000  | -1.638744000 | 2.897636000  |
| H | 1.956029000  | -2.592126000 | 3.408668000  |
| H | 0.997374000  | -1.113820000 | 3.472744000  |
| H | 2.684860000  | -1.047473000 | 2.963893000  |
| C | -1.219662000 | -2.094132000 | 1.896689000  |
| H | -1.340277000 | -3.062715000 | 2.399729000  |
| H | -1.165306000 | -1.335257000 | 2.685377000  |
| H | -2.136981000 | -1.919215000 | 1.324652000  |
| C | -7.407407000 | -0.722817000 | -0.197859000 |
| H | -8.031414000 | -1.280045000 | -0.904240000 |
| H | -7.309691000 | -1.329858000 | 0.710072000  |
| H | -7.946845000 | 0.193103000  | 0.070554000  |
| C | -6.042239000 | -0.404435000 | -0.803142000 |
| H | -5.542423000 | -1.338798000 | -1.095893000 |
| H | -6.175032000 | 0.174312000  | -1.727653000 |
| C | -5.137037000 | 0.375327000  | 0.153257000  |
| H | -5.001474000 | -0.201434000 | 1.079655000  |



|    |              |              |              |
|----|--------------|--------------|--------------|
| H  | -5.635515000 | 1.310930000  | 0.443818000  |
| C  | -3.768385000 | 0.699900000  | -0.455055000 |
| H  | -3.901258000 | 1.283184000  | -1.375173000 |
| H  | -3.266406000 | -0.234763000 | -0.743456000 |
| C  | -2.892905000 | 1.480431000  | 0.519300000  |
| H  | -2.711231000 | 0.919001000  | 1.441377000  |
| H  | -3.362506000 | 2.434558000  | 0.780770000  |
| S  | -1.277561000 | 1.910996000  | -0.245090000 |
| C  | -0.515636000 | 3.044134000  | 1.008486000  |
| C  | 1.578093000  | 3.448310000  | -0.346246000 |
| H  | 0.949594000  | 3.104106000  | -1.182860000 |
| H  | 1.504624000  | 4.541784000  | -0.378302000 |
| C  | 1.016887000  | 2.949274000  | 1.009434000  |
| C  | 1.479622000  | 1.537092000  | 1.420735000  |
| H  | -0.913899000 | 2.748920000  | 1.984624000  |
| H  | -0.867764000 | 4.054224000  | 0.775068000  |
| C  | 3.031908000  | 3.038403000  | -0.620727000 |
| C  | 3.220228000  | 1.630972000  | -1.119096000 |
| C  | 2.495806000  | 1.022983000  | -2.086452000 |
| H  | 3.645217000  | 3.197810000  | 0.271928000  |
| H  | 3.449542000  | 3.697994000  | -1.395973000 |
| H  | 4.060137000  | 1.075354000  | -0.699137000 |
| H  | 1.334647000  | 3.684855000  | 1.767834000  |
| H  | 1.002333000  | 1.287196000  | 2.383680000  |
| H  | 2.555556000  | 1.554678000  | 1.652782000  |
| H  | 2.808214000  | 0.059790000  | -2.489795000 |
| H  | 1.715048000  | 1.554415000  | -2.636287000 |
| Lu | 0.835624000  | -0.000899000 | -0.192683000 |

62

**TS-4,  $E_{(\text{SCF Done})} = -1298.763439$  a.u., IF =  $i296.1285$  cm<sup>-1</sup>**

|   |              |              |              |
|---|--------------|--------------|--------------|
| C | 0.048449000  | -2.119019000 | 1.054703000  |
| C | 0.094004000  | -2.505475000 | -0.320246000 |
| C | 1.461518000  | -2.482020000 | -0.742951000 |
| C | 2.258754000  | -2.081778000 | 0.371073000  |
| C | 1.388829000  | -1.850658000 | 1.481144000  |
| C | -1.064293000 | -2.992491000 | -1.147483000 |
| H | -2.024004000 | -2.600358000 | -0.794427000 |
| H | -1.136293000 | -4.087380000 | -1.103188000 |
| H | -0.965316000 | -2.729752000 | -2.207130000 |
| C | 1.971538000  | -2.951184000 | -2.076320000 |
| H | 2.102550000  | -4.041461000 | -2.077370000 |
| H | 2.943845000  | -2.514291000 | -2.324268000 |
| H | 1.284407000  | -2.714712000 | -2.896416000 |
| C | 3.759813000  | -2.040775000 | 0.409971000  |

|   |              |              |              |
|---|--------------|--------------|--------------|
| H | 4.136169000  | -1.328435000 | 1.151711000  |
| H | 4.195237000  | -1.775887000 | -0.559241000 |
| H | 4.165650000  | -3.024291000 | 0.681426000  |
| C | 1.818561000  | -1.561783000 | 2.892654000  |
| H | 1.998994000  | -2.496284000 | 3.440052000  |
| H | 1.059303000  | -1.007937000 | 3.456024000  |
| H | 2.747827000  | -0.984296000 | 2.934603000  |
| C | -1.165030000 | -2.137480000 | 1.942692000  |
| H | -1.270324000 | -3.114030000 | 2.433853000  |
| H | -1.109396000 | -1.389953000 | 2.742266000  |
| H | -2.092282000 | -1.964005000 | 1.385982000  |
| C | -7.365803000 | -0.763374000 | -0.127326000 |
| H | -7.983997000 | -1.345213000 | -0.818727000 |
| H | -7.262040000 | -1.345401000 | 0.796165000  |
| H | -7.914477000 | 0.153817000  | 0.116844000  |
| C | -6.004019000 | -0.447511000 | -0.741461000 |
| H | -5.494860000 | -1.384182000 | -1.009570000 |
| H | -6.142674000 | 0.105391000  | -1.680749000 |
| C | -5.106839000 | 0.366220000  | 0.194044000  |
| H | -4.964911000 | -0.184849000 | 1.135004000  |
| H | -5.614683000 | 1.304033000  | 0.460093000  |
| C | -3.741837000 | 0.688869000  | -0.423591000 |
| H | -3.881329000 | 1.247967000  | -1.357594000 |
| H | -3.231345000 | -0.248172000 | -0.689027000 |
| C | -2.873363000 | 1.501256000  | 0.531382000  |
| H | -2.681670000 | 0.960475000  | 1.463913000  |
| H | -3.354660000 | 2.454322000  | 0.775235000  |
| S | -1.267671000 | 1.935309000  | -0.252302000 |
| C | -0.505680000 | 3.059700000  | 0.997033000  |
| C | 1.520024000  | 3.659113000  | -0.462628000 |
| H | 0.867984000  | 3.327142000  | -1.284755000 |
| H | 1.501060000  | 4.754158000  | -0.477343000 |
| C | 1.021454000  | 3.099604000  | 0.886320000  |
| C | 1.699683000  | 1.738101000  | 1.120020000  |
| H | -0.813655000 | 2.706868000  | 1.987222000  |
| H | -0.935059000 | 4.053329000  | 0.834165000  |
| C | 2.927154000  | 3.116596000  | -0.685338000 |
| C | 2.928909000  | 1.598410000  | -0.668886000 |
| C | 2.414821000  | 0.827771000  | -1.750515000 |
| H | 3.598113000  | 3.502247000  | 0.091562000  |
| H | 3.328724000  | 3.446676000  | -1.650828000 |
| H | 3.764525000  | 1.145477000  | -0.136428000 |
| H | 1.340336000  | 3.796992000  | 1.675122000  |
| H | 1.058472000  | 1.073784000  | 1.762079000  |

|    |             |              |              |
|----|-------------|--------------|--------------|
| H  | 2.602843000 | 1.846466000  | 1.723791000  |
| H  | 3.024726000 | -0.009335000 | -2.088948000 |
| H  | 1.912401000 | 1.373050000  | -2.556594000 |
| Lu | 0.797221000 | -0.031824000 | -0.249344000 |

62

**L4,  $E_{(\text{SCF Done})} = -1298.788080$  a.u.**

|   |              |              |              |
|---|--------------|--------------|--------------|
| C | 0.036168000  | -2.359083000 | 1.032653000  |
| C | 0.127416000  | -2.735722000 | -0.342709000 |
| C | 1.491919000  | -2.586146000 | -0.754015000 |
| C | 2.239638000  | -2.109551000 | 0.360730000  |
| C | 1.338313000  | -1.954577000 | 1.464485000  |
| C | -0.984034000 | -3.312413000 | -1.177332000 |
| H | -1.972138000 | -2.957820000 | -0.863151000 |
| H | -1.002202000 | -4.407014000 | -1.093294000 |
| H | -0.870520000 | -3.084132000 | -2.243188000 |
| C | 2.057391000  | -2.967932000 | -2.092195000 |
| H | 2.400677000  | -4.010923000 | -2.082623000 |
| H | 2.915530000  | -2.347009000 | -2.366691000 |
| H | 1.318470000  | -2.886803000 | -2.896691000 |
| C | 3.729334000  | -1.936335000 | 0.407718000  |
| H | 4.038173000  | -1.199033000 | 1.155596000  |
| H | 4.135981000  | -1.620811000 | -0.557645000 |
| H | 4.217546000  | -2.883590000 | 0.672970000  |
| C | 1.726779000  | -1.610683000 | 2.876943000  |
| H | 1.983576000  | -2.519237000 | 3.437307000  |
| H | 0.916297000  | -1.120327000 | 3.427945000  |
| H | 2.602817000  | -0.955307000 | 2.919004000  |
| C | -1.182266000 | -2.478581000 | 1.905270000  |
| H | -1.218176000 | -3.466456000 | 2.383616000  |
| H | -1.192781000 | -1.739350000 | 2.714180000  |
| H | -2.114837000 | -2.370268000 | 1.340670000  |
| C | -7.238343000 | -0.521297000 | -0.088195000 |
| H | -7.805261000 | -1.239414000 | -0.689470000 |
| H | -7.233207000 | -0.884403000 | 0.946370000  |
| H | -7.783906000 | 0.429377000  | -0.105096000 |
| C | -5.819035000 | -0.354850000 | -0.626071000 |
| H | -5.311408000 | -1.330163000 | -0.632001000 |
| H | -5.858254000 | -0.023017000 | -1.672804000 |
| C | -4.990696000 | 0.641818000  | 0.187868000  |
| H | -4.945959000 | 0.311338000  | 1.235503000  |
| H | -5.497074000 | 1.617151000  | 0.193057000  |
| C | -3.568584000 | 0.817907000  | -0.355394000 |
| H | -3.612693000 | 1.164412000  | -1.396175000 |
| H | -3.063778000 | -0.160839000 | -0.365807000 |

|    |              |              |              |
|----|--------------|--------------|--------------|
| C  | -2.762355000 | 1.807015000  | 0.481065000  |
| H  | -2.646918000 | 1.459979000  | 1.513498000  |
| H  | -3.251632000 | 2.786419000  | 0.499132000  |
| S  | -1.099236000 | 2.076260000  | -0.251223000 |
| C  | -0.331118000 | 3.248317000  | 0.950526000  |
| C  | 1.666975000  | 3.929586000  | -0.577332000 |
| H  | 0.998620000  | 3.603289000  | -1.385505000 |
| H  | 1.682419000  | 5.023569000  | -0.602864000 |
| C  | 1.181354000  | 3.389096000  | 0.786232000  |
| C  | 2.011290000  | 2.092621000  | 1.015614000  |
| H  | -0.582850000 | 2.896360000  | 1.957453000  |
| H  | -0.824497000 | 4.212371000  | 0.790382000  |
| C  | 3.051846000  | 3.299841000  | -0.755349000 |
| C  | 2.863268000  | 1.844510000  | -0.272261000 |
| C  | 2.252283000  | 0.916188000  | -1.352879000 |
| H  | 3.781442000  | 3.822356000  | -0.120798000 |
| H  | 3.417057000  | 3.345016000  | -1.785571000 |
| H  | 3.820137000  | 1.406884000  | 0.031930000  |
| H  | 1.466748000  | 4.109681000  | 1.563899000  |
| H  | 1.374600000  | 1.250075000  | 1.381744000  |
| H  | 2.687629000  | 2.232781000  | 1.865962000  |
| H  | 3.056636000  | 0.459784000  | -1.937783000 |
| H  | 1.669956000  | 1.524147000  | -2.076920000 |
| Lu | 0.598680000  | -0.225741000 | -0.275899000 |

83

**K4',  $E_{(\text{SCF Done})} = -1933.934212$  a.u.**

|   |              |              |             |
|---|--------------|--------------|-------------|
| C | -1.023605000 | 0.953557000  | 2.405554000 |
| C | -0.543786000 | -0.392697000 | 2.412100000 |
| C | 0.883770000  | -0.351806000 | 2.387865000 |
| C | 1.285770000  | 1.016427000  | 2.346887000 |
| C | 0.105304000  | 1.823703000  | 2.355369000 |
| C | -1.372035000 | -1.630457000 | 2.620686000 |
| H | -2.417774000 | -1.477552000 | 2.337580000 |
| H | -1.370493000 | -1.924356000 | 3.679126000 |
| H | -0.996991000 | -2.492344000 | 2.055677000 |
| C | 1.785793000  | -1.534378000 | 2.592523000 |
| H | 1.909932000  | -1.742273000 | 3.664210000 |
| H | 2.788618000  | -1.369495000 | 2.185516000 |
| H | 1.382823000  | -2.447654000 | 2.140522000 |
| C | 2.693294000  | 1.524642000  | 2.492253000 |
| H | 2.833879000  | 2.507510000  | 2.029189000 |
| H | 3.433874000  | 0.842117000  | 2.060219000 |
| H | 2.954053000  | 1.639031000  | 3.552996000 |
| C | 0.065285000  | 3.320472000  | 2.468282000 |

|   |              |              |              |
|---|--------------|--------------|--------------|
| H | 0.061569000  | 3.629475000  | 3.522243000  |
| H | -0.829037000 | 3.745580000  | 2.003110000  |
| H | 0.936657000  | 3.795239000  | 2.004213000  |
| C | -2.450343000 | 1.383114000  | 2.589159000  |
| H | -2.709861000 | 1.403688000  | 3.656192000  |
| H | -2.628720000 | 2.387589000  | 2.194976000  |
| H | -3.160283000 | 0.707374000  | 2.101026000  |
| C | -7.762257000 | -2.364704000 | 0.871926000  |
| H | -8.427645000 | -2.023850000 | 1.672034000  |
| H | -8.335905000 | -2.358188000 | -0.062425000 |
| H | -7.488952000 | -3.404580000 | 1.087175000  |
| C | -6.525008000 | -1.475828000 | 0.768453000  |
| H | -6.832708000 | -0.436517000 | 0.586820000  |
| H | -5.992300000 | -1.473721000 | 1.730009000  |
| C | -5.566349000 | -1.918566000 | -0.339294000 |
| H | -6.099295000 | -1.921460000 | -1.300946000 |
| H | -5.255642000 | -2.957890000 | -0.158395000 |
| C | -4.325601000 | -1.025158000 | -0.447905000 |
| H | -3.785291000 | -1.021322000 | 0.506908000  |
| H | -4.641000000 | 0.009412000  | -0.634087000 |
| C | -3.390860000 | -1.499707000 | -1.552591000 |
| H | -3.904087000 | -1.545792000 | -2.519780000 |
| H | -3.019311000 | -2.508894000 | -1.342129000 |
| S | -1.878440000 | -0.498683000 | -1.838922000 |
| C | -2.532595000 | 1.081295000  | -2.525718000 |
| C | -0.292066000 | 2.118575000  | -3.088777000 |
| H | 0.132331000  | 1.102567000  | -3.016978000 |
| H | -0.537763000 | 2.256012000  | -4.149672000 |
| C | -1.569794000 | 2.237437000  | -2.237874000 |
| C | -1.275586000 | 2.330423000  | -0.734463000 |
| H | -3.495459000 | 1.270762000  | -2.042588000 |
| H | -2.697150000 | 0.928140000  | -3.597479000 |
| C | 0.793998000  | 3.133608000  | -2.693924000 |
| C | 1.507139000  | 2.818373000  | -1.403670000 |
| C | 2.269365000  | 1.724122000  | -1.188619000 |
| H | 0.353439000  | 4.134890000  | -2.636257000 |
| H | 1.549889000  | 3.168275000  | -3.489540000 |
| H | -2.104734000 | 3.135598000  | -2.593794000 |
| C | 7.958268000  | -1.729218000 | 0.197840000  |
| H | 8.770416000  | -0.995887000 | 0.238364000  |
| H | 7.872525000  | -2.185742000 | 1.191096000  |
| H | 8.256077000  | -2.515914000 | -0.505301000 |
| C | 6.645937000  | -1.074629000 | -0.227397000 |
| H | 6.393811000  | -0.266950000 | 0.474707000  |

|    |              |              |              |
|----|--------------|--------------|--------------|
| H  | 6.773617000  | -0.598037000 | -1.209387000 |
| C  | 5.482723000  | -2.066499000 | -0.296102000 |
| H  | 5.350254000  | -2.542334000 | 0.686346000  |
| H  | 5.735018000  | -2.874741000 | -0.997058000 |
| C  | 4.165991000  | -1.414074000 | -0.731075000 |
| H  | 4.295079000  | -0.954082000 | -1.719618000 |
| H  | 3.914906000  | -0.605405000 | -0.031400000 |
| C  | 3.029104000  | -2.427245000 | -0.779297000 |
| H  | 2.843571000  | -2.860755000 | 0.208053000  |
| H  | 3.276742000  | -3.240709000 | -1.470611000 |
| S  | 1.461515000  | -1.708736000 | -1.412627000 |
| C  | 0.449270000  | -3.216578000 | -1.482171000 |
| H  | 0.259138000  | -3.623038000 | -0.485403000 |
| H  | -0.492071000 | -2.959153000 | -1.971265000 |
| H  | 0.966141000  | -3.960930000 | -2.093857000 |
| H  | 2.880305000  | 1.638966000  | -0.291576000 |
| H  | 1.454120000  | 3.565607000  | -0.612353000 |
| H  | 2.444453000  | 0.995071000  | -1.979186000 |
| H  | -0.923190000 | 3.343922000  | -0.493674000 |
| H  | -2.230460000 | 2.240405000  | -0.186407000 |
| Lu | 0.060238000  | 0.564730000  | 0.075599000  |

83

**TS-4',  $E_{(\text{SCF Done})} = -1933.921056$  a.u., IF =  $i293.9991$  cm<sup>-1</sup>**

|   |              |              |             |
|---|--------------|--------------|-------------|
| C | -1.066850000 | 0.564083000  | 2.480178000 |
| C | -0.540390000 | -0.754965000 | 2.342237000 |
| C | 0.886292000  | -0.662599000 | 2.355309000 |
| C | 1.240781000  | 0.712024000  | 2.498984000 |
| C | 0.033913000  | 1.471526000  | 2.566935000 |
| C | -1.326309000 | -2.036186000 | 2.374663000 |
| H | -2.369322000 | -1.889072000 | 2.077783000 |
| H | -1.343260000 | -2.455520000 | 3.389839000 |
| H | -0.901843000 | -2.810099000 | 1.724012000 |
| C | 1.831222000  | -1.826535000 | 2.444374000 |
| H | 1.981437000  | -2.120384000 | 3.492320000 |
| H | 2.820371000  | -1.591921000 | 2.037768000 |
| H | 1.451179000  | -2.711434000 | 1.921990000 |
| C | 2.624250000  | 1.239018000  | 2.749256000 |
| H | 2.738806000  | 2.278919000  | 2.425819000 |
| H | 3.394394000  | 0.647716000  | 2.242312000 |
| H | 2.858256000  | 1.213446000  | 3.822115000 |
| C | -0.063580000 | 2.936418000  | 2.883379000 |
| H | -0.092745000 | 3.096137000  | 3.969628000 |
| H | -0.969696000 | 3.392490000  | 2.471417000 |
| H | 0.794745000  | 3.501382000  | 2.504596000 |

|   |              |              |              |
|---|--------------|--------------|--------------|
| C | -2.509937000 | 0.927167000  | 2.691465000  |
| H | -2.757882000 | 0.906230000  | 3.761273000  |
| H | -2.741843000 | 1.936437000  | 2.334675000  |
| H | -3.195943000 | 0.234948000  | 2.193157000  |
| C | -7.610115000 | -2.501105000 | 0.519323000  |
| H | -8.231419000 | -2.346198000 | 1.407565000  |
| H | -8.225752000 | -2.277124000 | -0.359800000 |
| H | -7.346964000 | -3.564767000 | 0.479055000  |
| C | -6.362353000 | -1.621919000 | 0.560272000  |
| H | -6.658467000 | -0.566167000 | 0.635421000  |
| H | -5.786058000 | -1.844103000 | 1.469693000  |
| C | -5.464705000 | -1.807866000 | -0.665265000 |
| H | -6.041560000 | -1.586997000 | -1.574733000 |
| H | -5.165820000 | -2.863408000 | -0.741210000 |
| C | -4.213005000 | -0.923719000 | -0.630256000 |
| H | -3.627711000 | -1.143748000 | 0.271353000  |
| H | -4.516935000 | 0.128743000  | -0.559564000 |
| C | -3.341385000 | -1.142413000 | -1.859223000 |
| H | -3.900238000 | -0.966704000 | -2.785478000 |
| H | -2.980673000 | -2.176025000 | -1.901944000 |
| S | -1.825291000 | -0.114241000 | -1.999380000 |
| C | -2.511067000 | 1.558468000  | -2.323664000 |
| C | -0.271517000 | 2.687647000  | -2.872266000 |
| H | 0.106602000  | 1.668779000  | -3.052772000 |
| H | -0.501491000 | 3.114506000  | -3.855283000 |
| C | -1.508376000 | 2.653374000  | -1.958705000 |
| C | -1.025047000 | 2.571528000  | -0.504422000 |
| H | -3.422038000 | 1.664878000  | -1.726967000 |
| H | -2.778771000 | 1.602277000  | -3.384414000 |
| C | 0.788037000  | 3.499415000  | -2.135715000 |
| C | 1.125929000  | 2.865535000  | -0.796741000 |
| C | 1.976035000  | 1.736012000  | -0.703553000 |
| H | 0.419907000  | 4.521782000  | -1.984333000 |
| H | 1.710699000  | 3.572024000  | -2.723344000 |
| H | -2.051977000 | 3.598402000  | -2.110477000 |
| C | 7.918470000  | -1.561975000 | -0.236674000 |
| H | 8.711591000  | -0.808460000 | -0.188604000 |
| H | 7.892244000  | -2.079184000 | 0.729912000  |
| H | 8.204090000  | -2.296393000 | -0.999026000 |
| C | 6.570206000  | -0.922902000 | -0.561123000 |
| H | 6.328950000  | -0.166643000 | 0.199426000  |
| H | 6.638200000  | -0.384501000 | -1.516679000 |
| C | 5.432318000  | -1.943160000 | -0.637908000 |
| H | 5.361378000  | -2.482353000 | 0.318019000  |

|    |              |              |              |
|----|--------------|--------------|--------------|
| H  | 5.672796000  | -2.699078000 | -1.399044000 |
| C  | 4.079326000  | -1.303753000 | -0.967766000 |
| H  | 4.145588000  | -0.779033000 | -1.929725000 |
| H  | 3.837380000  | -0.547044000 | -0.210383000 |
| C  | 2.970475000  | -2.347460000 | -1.028719000 |
| H  | 2.848599000  | -2.854417000 | -0.066904000 |
| H  | 3.199539000  | -3.102696000 | -1.789222000 |
| S  | 1.356299000  | -1.627669000 | -1.527007000 |
| C  | 0.362549000  | -3.144360000 | -1.646384000 |
| H  | 0.246434000  | -3.632969000 | -0.675601000 |
| H  | -0.617183000 | -2.871535000 | -2.044452000 |
| H  | 0.840204000  | -3.829712000 | -2.351741000 |
| H  | 2.730189000  | 1.746139000  | 0.081349000  |
| H  | 1.169644000  | 3.553639000  | 0.045260000  |
| H  | 2.297884000  | 1.279447000  | -1.642660000 |
| H  | -1.053969000 | 3.548834000  | -0.019177000 |
| H  | -1.724479000 | 1.960705000  | 0.117645000  |
| Lu | 0.112053000  | 0.487642000  | 0.144569000  |

83

**M4,  $E_{(\text{SCF Done})} = -1933.949418$  a.u.**

|   |              |              |             |
|---|--------------|--------------|-------------|
| C | -1.171287000 | -0.581076000 | 2.599401000 |
| C | -1.015989000 | -1.835636000 | 1.935709000 |
| C | 0.374795000  | -2.160016000 | 1.926561000 |
| C | 1.078819000  | -1.108857000 | 2.590964000 |
| C | 0.127185000  | -0.137448000 | 3.013158000 |
| C | -2.128940000 | -2.734760000 | 1.474510000 |
| H | -3.054447000 | -2.181325000 | 1.285905000 |
| H | -2.362945000 | -3.486346000 | 2.240584000 |
| H | -1.879537000 | -3.286730000 | 0.560415000 |
| C | 0.967427000  | -3.477995000 | 1.513718000 |
| H | 1.111005000  | -4.124701000 | 2.389725000 |
| H | 1.950552000  | -3.374562000 | 1.040096000 |
| H | 0.314668000  | -4.025050000 | 0.826128000 |
| C | 2.545946000  | -1.102353000 | 2.911222000 |
| H | 2.947608000  | -0.086639000 | 2.975411000 |
| H | 3.135595000  | -1.645221000 | 2.164204000 |
| H | 2.735197000  | -1.588143000 | 3.878131000 |
| C | 0.418363000  | 1.041737000  | 3.894667000 |
| H | 0.379337000  | 0.746472000  | 4.951978000 |
| H | -0.306400000 | 1.851016000  | 3.763432000 |
| H | 1.414274000  | 1.455275000  | 3.710467000 |
| C | -2.478624000 | 0.062840000  | 2.973285000 |
| H | -2.846666000 | -0.334940000 | 3.928462000 |
| H | -2.385532000 | 1.146636000  | 3.098339000 |



|   |              |              |              |
|---|--------------|--------------|--------------|
| H | -3.263707000 | -0.118409000 | 2.230964000  |
| C | -7.480551000 | -1.729235000 | -1.718180000 |
| H | -8.226074000 | -2.069117000 | -0.991811000 |
| H | -7.969883000 | -1.008363000 | -2.383625000 |
| H | -7.187384000 | -2.595105000 | -2.323698000 |
| C | -6.274395000 | -1.106819000 | -1.018676000 |
| H | -6.605185000 | -0.264967000 | -0.394436000 |
| H | -5.828636000 | -1.840739000 | -0.332067000 |
| C | -5.205980000 | -0.617586000 | -1.999147000 |
| H | -5.652014000 | 0.115631000  | -2.686122000 |
| H | -4.872199000 | -1.458463000 | -2.624521000 |
| C | -3.996054000 | 0.012559000  | -1.300850000 |
| H | -3.543630000 | -0.717007000 | -0.614963000 |
| H | -4.333545000 | 0.855660000  | -0.684281000 |
| C | -2.948508000 | 0.482336000  | -2.303188000 |
| H | -3.371234000 | 1.195973000  | -3.019630000 |
| H | -2.558146000 | -0.355824000 | -2.891686000 |
| S | -1.456704000 | 1.295752000  | -1.611995000 |
| C | -2.126852000 | 2.912875000  | -1.037073000 |
| C | 0.158407000  | 4.167485000  | -1.085295000 |
| H | 0.428291000  | 3.389385000  | -1.811639000 |
| H | 0.001139000  | 5.089813000  | -1.653917000 |
| C | -1.098575000 | 3.756182000  | -0.286330000 |
| C | -0.556781000 | 3.115234000  | 1.021080000  |
| H | -2.996116000 | 2.713818000  | -0.402438000 |
| H | -2.466216000 | 3.429034000  | -1.941795000 |
| C | 1.250560000  | 4.290646000  | -0.016993000 |
| C | 0.992879000  | 3.084591000  | 0.911987000  |
| C | 1.580804000  | 1.758755000  | 0.378948000  |
| H | 1.122854000  | 5.232816000  | 0.534859000  |
| H | 2.262797000  | 4.287884000  | -0.433866000 |
| H | -1.647653000 | 4.668480000  | -0.017256000 |
| C | 7.716637000  | -0.268638000 | -1.632881000 |
| H | 8.366651000  | 0.611520000  | -1.589751000 |
| H | 7.940709000  | -0.890372000 | -0.757829000 |
| H | 7.991662000  | -0.840839000 | -2.526820000 |
| C | 6.244588000  | 0.135695000  | -1.664616000 |
| H | 6.008198000  | 0.737376000  | -0.775763000 |
| H | 6.059289000  | 0.784599000  | -2.531795000 |
| C | 5.300505000  | -1.067151000 | -1.725503000 |
| H | 5.483288000  | -1.717708000 | -0.857903000 |
| H | 5.534373000  | -1.668271000 | -2.615828000 |
| C | 3.823103000  | -0.661252000 | -1.759901000 |
| H | 3.636415000  | -0.019294000 | -2.630379000 |

|    |              |              |              |
|----|--------------|--------------|--------------|
| H  | 3.587335000  | -0.063653000 | -0.869543000 |
| C  | 2.913149000  | -1.882929000 | -1.825012000 |
| H  | 3.043991000  | -2.531342000 | -0.952520000 |
| H  | 3.119725000  | -2.471913000 | -2.725605000 |
| S  | 1.143404000  | -1.402276000 | -1.944811000 |
| C  | 0.357022000  | -3.018522000 | -2.223886000 |
| H  | 0.599295000  | -3.722964000 | -1.425950000 |
| H  | -0.724802000 | -2.868272000 | -2.263303000 |
| H  | 0.690111000  | -3.412756000 | -3.187408000 |
| H  | 2.609604000  | 1.648933000  | 0.747872000  |
| H  | 1.420017000  | 3.264125000  | 1.904551000  |
| H  | 1.688564000  | 1.828718000  | -0.727459000 |
| H  | -0.863039000 | 3.720083000  | 1.882490000  |
| H  | -1.014428000 | 2.125686000  | 1.218546000  |
| Lu | 0.129349000  | -0.033937000 | 0.421632000  |
